# Supplementary material for: Enteric glia as a source of neural progenitors in adult zebrafish
Source: eLife. 2020 Aug 27;9:e56086. doi: 10.7554/eLife.56086 (PMC7521928; doi:10.7554/eLife.56086)
Supplement: Supplementary file 2. — Genes displayed in the heat map depicting the nRNASeq data of this study were selected as follows: genes with a logFC (Cherry+ vs Cherry-)>0, padj (Cherry+ vs Cherry-)<0.05 and an average TPM of 3. We intersected this selection with the 2,561 genes identified in ‘Additional File 2: Supplementary file 1 of Roy-Carson et al., 2017 as upregulated in 7 dpf phox2b:EGFP+ gut cells relative to EGFP- gut. This selection highlights 758 genes depicted in Figure 2—figure supplement 1F. Gene names and Ensembl gene IDs found in column K. [file elife-56086-supp2.xlsx]

## Sheet: Suppl File 2 McCallum
Supplementary File 2
Table containing the order of heatmap genes and values for Figure 2-figure supplement 1F
PE_SOX10_1	PE_SOX10_5	PE_SOX10_3	PE_SOX10_4	PE_SOX10_2	PE_neg_4	PE_neg_3	PE_neg_5	PE_neg_1	PE_neg_2	geneID
0.757143	-0.378512	0.228853	0.108366	-0.978795	-0.274017	-0.918464	-1.03641	0.248723	0.80862	MYADM_ENSDARG00000086815
1.14951	0.0131268	0.605721	0.13335	-1.1375	0.21084	0.643856	-1.20574	-2.53178	-1.42266	lmna_ENSDARG00000013415
0.355896	0.551526	0.49774	0.829828	0.645403	-0.199835	-1.06572	-1.57546	-1.21647	-1.37079	dynll1_ENSDARG00000058454
0.939051	0.913115	0.481627	0.199942	0.43625	-0.888527	-0.692855	-1.69909	-1.33819	-1.18677	vat1_ENSDARG00000056481
0.605949	0.287821	0.695479	0.285201	1.01928	-0.331907	-1.53103	-1.8472	-1.80193	-0.541455	rtn1a_ENSDARG00000006497
0.904491	1.0559	0.880644	-0.107384	0.497315	-0.907306	-1.55051	-2.59998	-1.72247	-0.928215	FAM20C_ENSDARG00000074317
1.37905	0.244084	1.09434	0.0505768	-0.406484	-0.48811	-0.733455	-2.09836	-1.0329	-1.98436	arvcfb_ENSDARG00000061688
1.32009	0.549884	1.253	-0.288663	-0.652376	-0.541497	-1.2322	-1.16313	-1.88164	-1.43322	gak_ENSDARG00000090654
0.422996	1.43505	0.231215	-0.624175	-0.0644501	-0.11336	0.0858547	-1.7734	-1.2709	-1.04758	acsl1a_ENSDARG00000030514
1.21281	1.42083	-0.769635	-0.184673	-0.037331	-0.00958605	-1.10912	-3.02339	-1.33151	-0.769635	gch1_ENSDARG00000070453
-2.22827	0.390641	-0.576192	1.26816	1.1542	-0.713696	-0.576192	-0.576192	-4	0.286304	her4.2_ENSDARG00000094426
0.468739	1.28005	0.108149	-0.312838	0.42651	-0.839384	-1.18731	-0.677112	-0.0921498	-1.32481	samsn1a_ENSDARG00000054543
1.11117	0.603483	1.18845	-0.562767	-0.301569	-1.07263	-2.34826	-0.247462	-0.909689	-0.98148	cacna1ha_ENSDARG00000060496
0.838509	1.00972	1.03878	-0.0889781	0.0516651	-1.18986	-1.66454	-1.41563	-0.591478	-1.41563	dock11_ENSDARG00000062485
1.09904	1.38697	0.376055	-0.135526	-0.328559	-1.07696	-1.39693	-0.884314	-0.988422	-1.56239	mcf2l2_ENSDARG00000079742
0.472042	1.33957	1.26297	-0.682989	-0.517111	-1.1941	-1.45887	-0.4129	-0.898326	-1.87737	adam8a_ENSDARG00000001452
0.802974	1.153	0.839417	-0.0103399	-0.18315	-1.61124	-0.426819	-0.869042	-1.53877	-1.30161	rasal2_ENSDARG00000036257
1.11714	0.880644	0.987774	0.00992684	-0.278054	-2.16827	-0.987328	-1.11936	-1.48709	-0.664303	prkceb_ENSDARG00000069928
0.784154	1.32292	0.0706886	0.0356158	0.38377	-2.19866	-1.40219	-0.202461	-1.67048	-0.697053	aatka_ENSDARG00000078222
1.45681	0.979044	0.322075	-0.276429	0.353376	-1.51728	-2.28533	-0.94354	-2.06702	-0.695613	fmnl2a_ENSDARG00000012586
1.02782	0.460161	0.904625	-0.560175	0.857704	-1.23916	-1.50219	-0.0838791	-1.71877	-2.32936	gnb2_ENSDARG00000035357
0.595733	1.07416	0.929932	-0.41493	0.871459	-1.48961	-0.953554	-1.21162	-1.32772	-2.3521	si:ch73-46j18.5_ENSDARG00000092467
0.481643	0.406875	0.014174	-0.198179	1.73859	-0.862312	-1.08594	-0.993908	-1.41436	-2.63675	dock4b_ENSDARG00000024874
1.3379	0.459724	0.394	0.133408	0.877679	-1.22186	-2.40118	-1.48864	-0.643153	-2.09633	dnajc6_ENSDARG00000079891
1.19975	1.21234	0.211743	-0.235499	0.828985	-1.69127	-1.67351	-1.77873	-1.14097	-2.09592	itpr1a_ENSDARG00000014655
1.33161	0.442106	0.236892	0.41139	0.695574	-0.738586	-1.57769	-1.07477	-1.85677	-1.68294	pcdh19_ENSDARG00000034344
1.65747	-0.0875058	0.352875	0.585993	0.325704	-0.701987	-2.4844	-0.886666	-2.40943	-1.51354	rufy3_ENSDARG00000029692
1.64913	0.486122	-0.724729	0.839003	0.407016	-1.73049	-2.17271	-0.73627	-1.70759	-1.6739	mapta_ENSDARG00000089314
0.533809	0.882243	0.590612	-0.243288	0.770132	-0.972511	0.0665775	-0.526815	-1.65628	-3.56154	clstn1_ENSDARG00000031720
0.74402	1.50333	0.386468	0.119823	0.359161	-0.396301	-1.98126	-1.61353	-1.65006	-2.68753	pbrm1_ENSDARG00000003877
1.22058	0.593	0.738117	-0.0150463	0.925575	-0.946875	-1.35453	-1.64731	-2.2688	-2.57693	hoxc1a_ENSDARG00000070337
1.12188	0.844902	0.507402	-0.323917	0.901316	-0.596935	-1.3339	-0.762359	-2.21842	-3.69647	amigo3_ENSDARG00000074469
0.94542	1.58261	0.0836684	-0.994626	0.250573	-0.507879	-2.31194	0.0950111	-2.04354	-3.15075	atp11a_ENSDARG00000008413
0.859613	0.715038	-0.805116	-0.216431	1.41247	-0.707819	0.120294	-4	-1.18699	-1.90945	kcnma1a_ENSDARG00000079840
1.19944	0.560177	-0.128209	-0.389334	1.61067	-0.781651	-1.15716	-4	-2.02084	-2.52531	hoxb5b_ENSDARG00000054030
1.43733	0.547584	0.512639	0.674767	0.609413	-1.42621	-1.95737	-2.65729	-1.76264	-2.3313	nav3_ENSDARG00000005476
1.69903	0.86135	-0.0608691	0.346176	0.478204	-0.860275	-2.29393	-3.00613	-1.91686	-2.56071	SRCIN1_ENSDARG00000059773
1.56966	0.718587	0.0537713	0.713028	0.724125	-1.1745	-2.30378	-3.71882	-2.78022	-2.39689	nhsb_ENSDARG00000079977
1.00596	0.143014	0.0402547	0.672835	1.60899	-1.37156	-2.59395	-3.71948	-1.5642	-2.00899	ap3m2_ENSDARG00000016128
1.79237	0.569035	0.9549	-0.0350885	-0.0451003	-1.38319	-1.63207	-3.67496	-2.07351	-2.76476	myo16_ENSDARG00000078582
1.79598	1.03208	0.416581	-0.113505	0.349467	-2.27233	-1.90149	-3.80839	-2.738	-1.98057	pcloa_ENSDARG00000063299
1.63478	1.00068	0.20566	-0.112049	0.0349995	-2.68334	-0.0284166	-1.8752	-2.01894	-2.88769	eml1_ENSDARG00000042840
1.18249	0.917059	1.03143	0.121456	-0.0524818	-2.21839	-0.148004	-2.13093	-1.56304	-4	nf1b_ENSDARG00000004184
0.878475	0.263194	1.27315	-0.139904	0.60969	-2.16657	0.45384	-2.06274	-2.00384	-4	ndrg4_ENSDARG00000103937
1.21759	1.1559	1.25076	-1.13828	-0.104337	-0.340777	-1.13828	-2.57641	-3.00704	-2.77571	si:ch211-117c9.5_ENSDARG00000071235
0.959218	1.23189	1.78091	-0.943266	-0.161734	-1.75771	-1.8431	-2.67709	-2.9912	-4	amigo1_ENSDARG00000079620
0.565916	1.77414	-0.145958	0.565916	0.353613	-1.61162	-0.844068	-1.77512	-2.0732	-4	jarid2a_ENSDARG00000060925
1.29074	0.572112	0.660467	0.145214	1.0755	-1.15644	-1.35389	-2.09085	-2.67582	-4	aatkb_ENSDARG00000104442
1.38508	1.12003	0.225213	0.733008	0.463618	-1.41724	-1.56533	-2.68732	-3.31536	-4	bean1_ENSDARG00000087413
0.844925	1.87181	-0.0295443	0.104941	0.677259	-1.82863	-1.3432	-4	-2.51829	-4	kcnj9_ENSDARG00000061636
0.667876	1.16857	1.08675	1.0636	-2.34239	-0.39486	-1.06228	-2.07936	-1.85697	-4	ntrk2a_ENSDARG00000059897
1.91857	0.788805	-0.228269	0.754453	-0.865699	-0.713696	-1.81323	-2.81323	-1.45066	-4	dlgap1b_ENSDARG00000037415
0.599092	1.69373	0.360305	0.510864	0.0562986	-0.668842	-0.82412	-2.03562	-4	-4	igsf11_ENSDARG00000017217
0.904693	1.48966	-0.365396	1.33722	-0.888074	-0.867896	-1.54597	-1.10708	-3.33738	-4	RHOBTB2_ENSDARG00000074828
0.258233	-1.10434	-1.91169	-1.58976	-2.91169	-1.74177	0.703018	1.88272	0.869668	-2.58976	trpm2_ENSDARG00000095696
0.862496	-0.97208	2.4018	-0.557042	-1.26426	-3.07162	-1.45271	-2.02099	-2.41954	-1.41954	CU856539.1_ENSDARG00000010023
1.62466	-0.630151	1.99788	-0.20694	-2.76765	-3.76765	-2.91966	-1.00212	-1.38914	-2.50462	trpa1a_ENSDARG00000016699
1.18624	1.71636	0.934601	-1.37642	-2.148	-3.32309	-3.7227	-2.83434	-1.2112	0.22455	atp8a1_ENSDARG00000105446
0.797087	-0.391359	2.22404	0.26984	-4	-2.81762	-3.81762	-3.6477	-2.6477	0.182377	si:dkeyp-27e10.3_ENSDARG00000063008
-0.582361	1.55691	1.64281	1.49359	-1.62189	-4	-4	-2.98446	-4	-4	hsbp1a_ENSDARG00000069425
-0.165187	1.152	2.08398	1.12324	-2.00846	-2.774	-4	-4	-4	-4	nptnb_ENSDARG00000043864
-0.716828	0.0761717	2.76962	-0.155871	-2.73118	-4	-3.79008	-1.46815	-4	-4	ncanb_ENSDARG00000005783
-2.85549	0.925868	2.90606	-1.60756	-4	-2.85549	-4	-4	-4	-4	oprk1_ENSDARG00000006894
2.04736	-0.289679	1.58651	-0.58341	-2.01404	-3.95264	-1.83717	-0.493213	-4	-4	lrfn1_ENSDARG00000027602
1.23329	1.58809	1.5432	-0.161937	-3.52826	-4	-1.85583	-1.52826	-4	-4	clvs2_ENSDARG00000053122
1.33487	1.96121	0.927443	-1.64241	-0.887525	-4	-4	-0.598019	-4	-4	unc5db_ENSDARG00000061541
1.42854	1.56425	1.6413	-2.32833	-1.22523	-4	-4	-1.65695	-3.76129	-2.83529	atat1_ENSDARG00000004472
1.45935	1.06743	0.918206	-0.227645	-4	-4	-4	1.07575	-3.78223	-2.46031	ptprt_ENSDARG00000097572
1.87273	0.744589	1.74173	-1.38042	-3.33151	-3.2384	-4	-0.778973	-3.15094	-4	pcdh2ab8_ENSDARG00000089874
1.71049	1.91908	0.0766213	0.0766213	-4	-2.78136	-4	-0.652077	-4	-4	nsfa_ENSDARG00000007654
2.21242	1.65859	0.112194	-0.684819	-4	-3.09986	-3.09986	-2.14877	-4	-4	ARHGAP22_ENSDARG00000076434
1.44863	0.772483	2.06222	-0.0858194	-3.45505	-1.74723	-4	-4	-4	-4	sncb_ENSDARG00000104945
2.09908	1.16502	1.41779	-1.95661	-2.31918	-1.90414	-4	-4	-4	-4	sez6a_ENSDARG00000100876
1.30096	0.828473	2.36141	-3.03402	-4	-2.40599	-3.90849	-4	-2.6861	-3.49346	flot2b_ENSDARG00000069774
1.57009	1.11718	2.18709	-4	-3.02237	-4	-3.70044	-4	-4	-4	eif3bb_ENSDARG00000074213
2.52546	0.932886	1.13551	-2.87447	-4	-4	-4	-4	-4	-4	GABRA2_ENSDARG00000034011
1.7627	1.94882	0.690183	-2.42665	-4	-2.66872	-4	-1.71811	-3.8456	-1.50497	rab3ab_ENSDARG00000043835
1.58311	2.39113	0.0234366	-1.89031	-3.99722	-4	-4	-4	-4	-1.35781	fgf14_ENSDARG00000040982
0.248218	2.83834	0.33355	-4	-4	-4	-4	-2.01792	-3.55397	-4	gprc5ba_ENSDARG00000077080
1.72445	1.68138	1.45005	-1.24754	-4	-2.8325	-4	-2.36302	-4	-4	hpcal4_ENSDARG00000070491
2.12262	1.68966	0.992223	-2.04731	-4	-4	-4	-2.8953	-4	-4	nlgn1_ENSDARG00000087133
1.67202	2.43624	-0.344918	-2.47562	-4	-1.3336	-4	-4	-4	-4	adcy8_ENSDARG00000031783
0.746126	2.63217	0.396541	-0.557655	-2.97269	-4	-4	-4	-4	-4	rab39ba_ENSDARG00000019312
0.992492	2.65876	-0.0456427	-0.995017	-4	-3.53107	-4	-4	-4	-3.26804	ptpreb_ENSDARG00000021151
1.72142	2.1735	0.646329	-0.922909	-3.95853	-4	-4	-4	-4	-4	fam131ba_ENSDARG00000070952
2.14629	2.17604	-1.20163	-1.33914	-3.0761	-4	-3.66107	-4	-4	-4	kifc1_ENSDARG00000001558
1.22918	0.990283	1.03873	0.14736	-0.587437	-0.988099	-2.34834	-1.69674	-1.50911	-1.05502	kif1b_ENSDARG00000037020
1.03972	1.75257	0.123624	-0.0010953	-0.871917	-0.192176	-2.37256	-2.20614	-1.54643	-1.68039	gnao1a_ENSDARG00000016676
0.520007	1.15472	0.901436	1.29445	-1.92057	-1.64046	-2.40599	-1.92057	-1.3356	-0.773724	znf219_ENSDARG00000079738
0.983068	1.40933	-0.0371099	0.485568	-0.0627358	-0.711124	-0.752229	-1.77747	-2.93893	-1.29204	basp1_ENSDARG00000053358
1.87324	0.712859	-0.0724696	0.559093	-0.480239	-0.473008	-2.16267	-2.44444	-4	-1.40262	pclob_ENSDARG00000098880
1.4313	0.93305	0.719646	0.942039	-1.80392	-2.38888	-0.803916	-3.21895	-1.74502	-1.43468	sacs_ENSDARG00000091042
1.14259	0.970407	0.429046	1.46348	-1.13495	-1.67381	-1.87817	-3.49484	-2.70129	-1.16652	sgip1a_ENSDARG00000097897
1.0389	1.83709	0.658963	0.206451	-1.23412	-3.30451	-1.58205	-3.04148	-2.30451	-1.13459	kifap3b_ENSDARG00000006862
1.87552	0.924675	0.0315907	0.753855	-0.835143	-2.6425	-0.975073	-2.92261	-4	-1.52051	nrxn2a_ENSDARG00000061454
1.35884	0.661539	1.23285	0.815986	-3.34663	-0.676783	-1.52066	-3.34663	-3.2211	-1.10563	slc9a6b_ENSDARG00000075382
1.4006	1.12748	0.844061	1.03186	-2.37599	-2.62597	-2.1075	-2.16299	-4	-0.940601	kif3cb_ENSDARG00000079500
1.55141	1.24822	-0.536053	1.56081	-3.38405	-2.89862	-2.89862	-3.12102	-4	-0.898623	camsap1a_ENSDARG00000019208
0.560279	1.01467	1.20771	0.872814	-0.0407316	-1.3057	-3.0635	-1.35301	-1.4186	-3.29027	dpysl2b_ENSDARG00000032083
1.00228	1.14314	1.24766	0.417316	-0.698161	-1.02937	-4	-0.854281	-2.28312	-2.46	rgs16_ENSDARG00000040177
1.56195	1.53016	-0.0750394	0.978955	-2.31383	-1.31383	-3.63575	-2.56537	-1.70975	-3.63575	UBE2O_ENSDARG00000100674
0.189478	1.73697	0.858272	1.34702	-1.39548	-1.926	-4	-2.28857	-2.28857	-3.09592	gpr27_ENSDARG00000006607
0.894322	0.459919	0.964711	1.88709	-1.42761	-1.22597	-4	-2.57961	-2.74953	-4	ccdc85a_ENSDARG00000039497
1.88054	1.10145	0.221027	0.331451	-0.623695	-1.77897	-4	-0.653442	-2.91648	-4	nbeab_ENSDARG00000105184
1.30986	1.17326	1.16323	0.101538	-0.870717	-1.37551	-4	-0.22741	-4	-3.77761	tspan7b_ENSDARG00000008407
0.95363	0.982341	1.34214	1.07189	-1.36107	-1.75226	-3.68299	-0.705715	-3.7761	-4	si:dkeyp-115d7.2_ENSDARG00000089297
1.94313	0.614681	0.537974	0.851012	-2.13322	-1.82389	-3.74989	-0.399395	-4	-4	pacsin1a_ENSDARG00000032865
2.24128	0.485955	0.755329	0.0151154	-1.8867	-1.23739	-4	-2.09901	-3.50236	-2.90197	myh14_ENSDARG00000073732
0.17447	0.872704	1.47134	1.5434	-1.50935	-0.243755	-3.15704	-4	-4	-4	rtn4rl2b_ENSDARG00000037495
0.688221	1.7213	0.238056	1.25322	-0.702238	-0.296982	-4	-4	-4	-4	syn1_ENSDARG00000060368
-0.249614	1.90479	-0.506251	1.50012	0.181365	-0.668218	-4	-4	-4	-4	ptprn2_ENSDARG00000035970
-0.274622	0.815575	0.436517	2.0658	0.407806	-1.22882	-4	-4	-4	-4	cnr1_ENSDARG00000009020
1.20173	0.0258786	-1.02857	2.47849	-1.72901	-1.80301	-4	-4	-4	-4	gabrg2_ENSDARG00000053665
0.426459	2.30515	-1.06831	0.191081	-2.79077	-4	-0.33134	-0.686435	-1.20581	-4	lrp1ba_ENSDARG00000094171
1.45907	1.13035	0.866789	0.386382	-1.49983	-2.65363	-0.105197	-2.24764	-2.06867	-4	ppfia3_ENSDARG00000077053
2.14942	0.932189	-0.291707	0.593255	-1.41246	-2.30228	-1.08596	-2.99742	-3.06781	-4	hivep3a_ENSDARG00000075928
1.14242	1.8736	0.924826	0.475841	-1.801	-3.17951	-2.04201	-4	-2.91648	-4	fzd3a_ENSDARG00000021664
1.66846	0.844035	0.312184	1.5846	-2.15597	-3.06286	-2.10866	-4	-2.97539	-4	glra1_ENSDARG00000012019
0.555448	2.20558	1.23931	-1.03667	-2.78084	-3.24478	-0.97348	-4	-3.29541	-2.26987	crtc1b_ENSDARG00000076076
1.60301	0.97406	1.18259	0.323763	-1.55888	-3.88081	-0.0542595	-4	-3.79335	-4	cldn19_ENSDARG00000044569
1.14474	0.229624	1.97071	0.608136	-4	-4	-0.227234	-3.57773	-3.57773	-3.89966	coro1cb_ENSDARG00000021193
1.06341	1.84372	-1.18813	1.45847	-4	-1.85253	-3.33252	-1.41052	-2.02586	-3.41052	gdap1_ENSDARG00000058601
1.74514	2.15712	-2.1375	-0.0500407	-3.33015	-0.889576	-2.96758	-2.43706	-4	-4	alk_ENSDARG00000095833
1.3594	2.11109	-1.63649	1.14248	-4	-1.54134	-4	-4	-2.926	-4	DOCK4_ENSDARG00000076213
0.39537	2.59793	-0.60463	0.477833	-4	-1.37016	-4	-3.69209	-3.37016	-4	RNF19B_ENSDARG00000020284
1.29218	2.59393	-0.877744	-0.485427	-4	-2.55582	-4	-4	-3.55582	-4	chrna7_ENSDARG00000101702
1.66078	1.05283	0.577204	1.20856	-1.65782	-1.97974	-3.97974	-2.34033	-4	-3.77329	ctnna2_ENSDARG00000024785
1.71102	1.24265	0.200574	1.24122	-1.44144	-2.41414	-4	-2.34375	-4	-4	pcnxl2_ENSDARG00000055698
1.36202	2.31328	-0.157352	-0.256887	-1.47928	-2.47928	-4	-2.70167	-4	-4	ccdc85al_ENSDARG00000005343
1.29458	2.08813	0.459352	0.380997	-1.76728	-3.78223	-4	-2.81261	-4	-4	clip3_ENSDARG00000054456
1.13586	2.33066	-0.386709	0.518654	-1.99475	-3.1416	-4	-3.09097	-4	-4	slc18a2_ENSDARG00000015110
1.72338	1.59991	-0.158698	1.18322	-1.83007	-2.67807	-4	-4	-4	-4	KCNJ6_ENSDARG00000058985
2.37594	1.02146	0.0117452	0.438916	-2.87578	-2.80539	-3.73828	-4	-4	-4	ppp2r2cb_ENSDARG00000062277
2.09884	1.57589	-0.303259	0.397181	-2.30326	-4	-3.11061	-2.30326	-4	-4	si:dkey-27p18.5_ENSDARG00000068624
2.07397	1.43661	-1.2538	0.919012	-1.76281	-4	-3.96075	-2.1057	-4	-3.02585	lpar5b_ENSDARG00000068638
2.41828	1.19048	-1.44274	0.586406	-2.35701	-4	-4	-2.15056	-4	-4	RHOBTB1_ENSDARG00000079468
1.94255	2.06149	0.171368	-0.735522	-2.88753	-4	-4	-3.05745	-4	-4	cacng4b_ENSDARG00000074669
2.6528	0.769869	-0.0545591	-0.552059	-2.4696	-4	-4	-3.05456	-4	-4	barx2_ENSDARG00000041098
1.46503	1.00814	0.39501	1.70447	-3.28617	-4	-4	-1.62059	-2.50029	-4	atp8b2_ENSDARG00000099216
1.75916	1.40287	0.3306	1.20147	-2.95233	-4	-4	-1.81483	-4	-4	si:ch211-69e5.1_ENSDARG00000079519
2.16826	0.597254	0.576269	0.959245	-4	-3.34656	-3.81605	-1.6836	-4	-4	zgc:171965_ENSDARG00000077638
2.6416	-0.247365	-1.3584	1.15762	-4	-4	-4	-1.75432	-4	-4	waif2_ENSDARG00000054575
2.20179	-0.238787	-3.36807	1.8316	-4	-1.36807	-2.56071	-1.66763	-4	-4	C9orf172_ENSDARG00000076268
1.26183	0.931111	1.20043	1.40932	-4	-0.908092	-4	-4	-2.66016	-4	ak5_ENSDARG00000012555
1.80882	1.5043	-0.358192	1.15507	-3.13955	-1.23266	-3.3322	-4	-4	-4	lhfpl3_ENSDARG00000021595
0.682518	1.0906	-0.0179219	2.23947	-4	-1.21057	-4	-4	-4	-4	VSTM2B_ENSDARG00000098810
0.705417	1.0449	0.0907069	2.23537	-2.32433	-4	-4	-3.58736	-2.0024	-4	epdr1_ENSDARG00000045420
1.10303	1.45241	0.930048	1.44278	-2.23529	-4	-2.90514	-4	-3.45768	-4	pcdhb_ENSDARG00000077023
0.606058	1.90925	0.801609	1.43322	-2.34814	-4	-4	-4	-4	-4	sypa_ENSDARG00000042974
1.15727	1.2489	-0.915488	2.19807	-4	-2.77347	-4	-4	-3.45154	-4	tlr7_ENSDARG00000075685
1.88319	0.941106	-0.906891	1.9039	-3.81378	-4	-4	-4	-4	-4	tmem179_ENSDARG00000013292
1.43639	1.21908	0.980009	1.37073	-4	-3.27633	-3.74582	-4	-2.49206	-4	si:dkey-84j12.1_ENSDARG00000094625
2.22832	0.329414	0.244246	1.37909	-4	-4	-4	-3.79528	-2.44165	-4	chrm3b_ENSDARG00000071298
1.87652	-0.678072	1.49185	1.29921	-3.67807	-4	-4	-4	-2.09311	-4	galnt13_ENSDARG00000099227
1.12308	1.07085	1.9958	0.528472	-4	-4	-2.6907	-4	-4	-4	trim2b_ENSDARG00000076174
1.43784	2.01096	0.406269	0.74932	-4	-4	-4	-3.04468	-4	-4	cadm1a_ENSDARG00000031075
1.77897	1.50958	0.719633	0.895663	-3.31379	-4	-3.99186	-4	-4	-4	grid1b_ENSDARG00000044161
1.66935	1.35157	0.731671	1.33071	-4	-4	-4	-4	-4	-4	sv2c_ENSDARG00000059997
1.63263	1.62358	1.21759	0.520154	-4	-4	-4	-4	-4	-4	arf3a_ENSDARG00000070539
1.76692	1.44746	1.26359	0.409984	-4	-4	-4	-4	-4	-4	OGDHL_ENSDARG00000079249
2.52481	0.567041	0.188529	0.567041	-4	-4	-3.54844	-4	-4	-4	nptxrb_ENSDARG00000053375
1.55383	2.71404	-2.85798	-3.49541	-4	-4	-2.08037	-4	-4	-4	gnaq_ENSDARG00000011487
1.74487	2.61633	-4	-4	-1.11548	-4	-4	-4	-4	-4	samd10b_ENSDARG00000094377
0.0311326	3.01073	-4	-0.53771	-4	-4	-4	-2.53771	-4	-4	rtn4rl1a_ENSDARG00000007856
-1.74529	3.07017	-2.99322	0.136062	-4	-4	-3.67129	-4	-4	-4	rtn2a_ENSDARG00000016088
1.99764	-2.12575	1.27635	-2.47367	0.91239	-1.40954	-4	-0.611172	-3.12575	-3.12575	si:dkey-13n15.2_ENSDARG00000061806
2.10148	-0.75197	1.14615	-0.145312	0.214863	-1.51096	-3.62644	-1.75197	-3.88947	-4	parp6a_ENSDARG00000042703
1.8639	-2.36364	2.06932	-0.768029	-0.99751	-1.5887	-4	-1.70574	-2.42923	-4	upf3a_ENSDARG00000069297
1.72599	-2.58496	2.30433	-0.489805	-1.4199	-3.38143	-4	-1.67516	-3.45943	-4	tp53i11a_ENSDARG00000069430
2.48944	-2.2501	1.2824	-0.357011	-0.809523	-4	-4	-2.2501	-4	-4	atp6v0a2a_ENSDARG00000035538
0.715271	-1.42223	2.68629	-1.28473	-0.189572	-4	-4	-2.1592	-4	-4	tbc1d32_ENSDARG00000041734
1.15469	-4	-0.659925	-0.701246	2.53542	-4	-0.852085	-4	-4	-3.55835	hmx2_ENSDARG00000070954
0.711374	-2.80735	0.805088	-0.259867	2.3991	-2.42033	-4	-4	-4	-3.04836	gdap1l1_ENSDARG00000028628
2.29862	-4	0.925269	-0.897385	1.36296	-4	-4	-4	-4	-4	tmeff2a_ENSDARG00000051824
-0.2159	-3.53783	2.87882	-0.155359	-1.53783	-4	-2.53783	-4	-4	-1.82162	cyb561_ENSDARG00000038176
1.72437	-3.52356	1.65966	1.43837	-3.7866	-3.7866	-2.52356	-4	-1.8606	-3.10852	jazf1a_ENSDARG00000102551
1.6075	-1.90977	1.34195	2.05139	-4	-4	-4	-4	-4	-4	KCNA3_ENSDARG00000079491
0.569377	1.76692	0.0818858	-0.775945	0.360102	-1.51923	-0.815796	-1.58913	-1.37113	-0.859863	nol4lb_ENSDARG00000037607
-0.510079	2.15707	-0.181456	-0.472819	0.650496	-1.55264	-1.4934	-2.06598	-2.01748	-1.0476	prnprs3_ENSDARG00000003705
0.708027	1.77437	-0.343812	-0.0965022	0.87858	-1.76276	-2.70136	-2.47897	-1.40368	-1.40368	ppm1ab_ENSDARG00000043250
-0.198145	0.0497826	-0.449207	0.275786	2.11171	-1.61318	-2.51009	-2.04614	-0.860275	-0.908638	SPOCK1_ENSDARG00000074644
1.14319	0.422709	0.950067	-0.588263	1.08222	-2.3549	-3.33628	-2.29976	-1.27296	-0.27739	gmip_ENSDARG00000077249
1.53375	0.474984	0.713075	-0.853272	0.747458	-2.86921	-2.86921	-1.74636	-3.03914	0.201176	camsap2a_ENSDARG00000062173
-0.809414	0.619085	0.562144	-0.0979195	1.47352	-3.22445	-2.44952	-2.17715	-2.1016	0.971945	tuba2_ENSDARG00000045014
0.813408	0.583975	0.290987	0.871234	0.939758	-2.98136	-3.73138	-1.68302	-4	0.307039	GARNL3_ENSDARG00000060631
1.62412	1.02688	-1.29504	0.841618	0.458472	-2.25852	-4	-1.4307	-3.41052	-0.747557	myrip_ENSDARG00000038814
-0.280552	1.25576	-1.33442	1.03684	1.5994	-1.61005	-4	-1.7287	-4	-0.770518	sncgb_ENSDARG00000098380
1.65336	0.567205	0.470837	0.422581	-0.158705	-1.83458	-3.41954	-3.04917	-1.91911	-0.0122193	hoxa5a_ENSDARG00000102501
1.78115	0.801264	0.071678	0.231755	0.434248	-1.71014	-4	-3.73568	-1.20318	-1.2951	FAM107A_ENSDARG00000086300
1.32144	1.3848	0.363987	0.470493	-0.068306	-1.89638	-4	-2.97134	-4	-0.339076	cacna1ea_ENSDARG00000062346
0.771851	1.49596	0.690836	-0.0830557	0.757003	-2.10098	-4	-3.33544	-3.61555	-0.378512	syt11a_ENSDARG00000057913
1.62649	0.270611	-0.662275	1.05488	0.844078	-1.57739	-3.45874	-4	-4	-0.47785	ptpn5_ENSDARG00000074866
1.12557	0.86847	0.927364	0.66328	0.70366	-2.13153	-4	-4	-3.22173	-0.918536	ccdc177_ENSDARG00000067841
1.86801	0.661415	-0.0379679	0.682415	0.45724	-2.22865	-4	-4	-2.84532	-1.22865	pcdh1a4_ENSDARG00000097170
2.01444	0.637787	0.0786761	0.128078	0.652758	-2.9817	-4	-4	-3.85206	-1.33243	vgf_ENSDARG00000105529
1.52349	0.367946	-0.139818	0.226522	1.0815	-0.405307	-1.93683	-3.59925	-3.25058	-1.19463	si:ch211-195b15.8_ENSDARG00000094836
1.6148	-0.981563	1.17558	-0.088478	1.04116	-0.730024	-2.49941	-4	-3.2584	-1.91445	zgc:109889_ENSDARG00000069600
0.949349	0.443995	1.18339	-0.504901	1.1305	-0.0518735	-4	-3.97104	-4	-1.25644	calcrla_ENSDARG00000011473
1.29196	0.580461	0.774233	0.247218	0.676386	-1.69707	-3.28204	-0.632943	-2.34915	-1.69707	grid2_ENSDARG00000055302
1.46663	1.12651	0.734613	0.0462627	0.168945	-1.83105	-4	-1.05084	-1.86276	-2.44773	pcdh1g26_ENSDARG00000099931
1.56137	1.31534	0.247035	-0.414231	0.640046	-2.27798	-3.00381	-1.65986	-2.4948	-2.06039	snap91_ENSDARG00000098809
1.24118	0.528366	0.663842	-0.000602671	1.01339	-1.54008	-4	-1.29369	-2.87373	-0.627356	dgkaa_ENSDARG00000060626
1.54457	1.47078	0.291889	-0.396696	-0.358828	-1.32193	-4	-0.78136	-3.42772	-1.27886	bcr_ENSDARG00000079286
0.877301	1.65384	0.680609	0.407222	-0.135615	-2.28877	-4	-1.31204	-2.25456	-1.52664	srgap3_ENSDARG00000060309
0.364347	1.46973	0.971293	0.815375	0.0170086	-2.41541	-4	-1.43766	-2.92159	-1.05857	ptprnb_ENSDARG00000077047
0.589162	0.968104	1.36257	-0.372216	0.991563	-1.82215	-2.64071	-1.86748	-4	-1.11828	cd99l2_ENSDARG00000056722
1.14116	1.01147	1.40311	-0.0921498	0.223626	-1.36134	-2.9463	-2.12318	-3.64674	-2.32481	cacna2d2a_ENSDARG00000103390
1.10436	1.00193	1.04002	-0.155981	1.0306	-1.38918	-4	-2.09279	-4	-2.52163	MTCL1_ENSDARG00000091408
0.904823	0.902456	1.60926	0.0358615	0.491361	-1.9049	-3.82428	-2.15802	-4	-2.59296	nav1b_ENSDARG00000058771
1.53516	1.24123	0.535907	-0.604744	0.295307	-0.400386	-3.08161	-1.86844	-3.71802	-2.49359	b3gnt2a_ENSDARG00000052376
1.32941	0.434903	0.193895	-0.15006	1.60893	-0.806105	-4	-2.04314	-4	-2.52857	stx12l_ENSDARG00000044605
1.38842	1.13703	0.890457	-0.0862998	0.583238	-1.34802	-4	-3.2366	-2.69116	-2.49185	tbx2a_ENSDARG00000018025
1.07594	0.918855	0.607238	0.170196	1.36424	-2.27211	-4	-2.69642	-3.34319	-1.91185	gata3_ENSDARG00000016526
1.41089	1.21831	0.484377	0.408548	0.753185	-2.18961	-4	-2.77741	-4	-3.00837	znf536_ENSDARG00000103648
1.76776	1.02039	0.838553	0.106365	0.190317	-2.7681	-4	-2.88176	-3.64257	-2.8583	nrxn1b_ENSDARG00000063635
0.142465	-0.566073	1.68371	-1.01673	1.66134	-0.714171	-4	-2.46419	-3.11627	-1.33866	GPR180_ENSDARG00000099851
0.932344	-0.749105	1.76122	-1.88517	1.40632	-1.92536	-4	-1.05311	-3.01792	-1.81553	ttll10_ENSDARG00000090472
0.713335	1.12065	1.45382	0.080297	-0.464308	-4	-1.94378	-0.725354	-2.37743	-0.876032	BX005294.1_ENSDARG00000098705
0.394536	0.999156	1.30003	0.556773	0.119577	-4	-3.15086	-1.66945	-2.01676	-0.0426021	dab2ipa_ENSDARG00000069484
0.971431	1.12221	0.307956	0.572604	0.426856	-3.18875	-4	-0.920257	-1.2965	-0.458353	ptprfa_ENSDARG00000103479
1.4932	0.738177	0.950672	0.319501	-0.347923	-2.72489	-4	-1.666	-1.12663	-0.765535	arrb1_ENSDARG00000043241
0.733607	0.56469	1.91714	-0.439854	0.251807	-4	-4	-1.50027	-1.69291	-1.11884	myo5aa_ENSDARG00000061635
0.473541	1.06434	1.6329	-0.741848	0.947894	-3.88753	-3.88753	-2.08017	-1.96153	-1.92405	vangl1_ENSDARG00000004305
1.19341	-0.678072	1.83691	0.624048	-0.330149	-4	-4	-1.25486	-1.74519	-1.25486	osbpl6_ENSDARG00000063730
1.37357	-1.36869	1.75817	0.158561	0.787025	-4	-3.28622	-1.59817	-4	-1.45615	snap25b_ENSDARG00000058117
2.08729	-0.156772	0.431371	0.887139	-0.307714	-4	-4	-1.30771	-4	-1.17278	xgb_ENSDARG00000032896
1.30496	0.658314	-0.0759138	1.74699	-0.354069	-4	-4	-2.91437	-3.33758	-0.704256	celsr3_ENSDARG00000055825
1.3845	0.516922	-0.0565835	0.20237	1.35356	-3.50627	-1.93923	-2.70657	-4	-0.354264	CABZ01069081.1_ENSDARG00000101522
1.2693	1.11507	1.00075	-0.419313	0.451121	-3.81567	-2.7332	-3.6552	-3.37957	-0.134944	dmtn_ENSDARG00000013110
0.395132	0.450551	1.11055	0.281839	1.62242	-4	-1.67728	-3.69435	-4	-1.24118	gap43_ENSDARG00000099744
1.22172	-0.0539784	1.02992	1.08064	1.02175	-4	-2.49908	-3.21529	-4	-2.46806	si:dkeyp-41f9.4_ENSDARG00000092269
0.968499	0.541736	1.70928	-0.285013	0.810468	-3.04751	-2.60694	-4	-4	-1.31571	adssl1_ENSDARG00000099517
0.860286	1.07621	1.46253	0.748281	0.12332	-4	-2.55128	-4	-4	-1.81431	slc2a3a_ENSDARG00000013295
1.45347	0.354909	1.18416	0.549556	0.594683	-4	-3.92395	-2.92395	-2.98167	-1.46709	epb41l3a_ENSDARG00000002255
1.55778	0.698036	1.07261	0.080244	0.803314	-4	-3.99555	-3.17414	-3.72594	-2.15747	si:dkey-161j23.5_ENSDARG00000094441
1.53435	0.207739	1.18582	0.524973	0.892906	-4	-4	-3.68582	-4	-1.82956	syt4_ENSDARG00000036505
1.84633	1.02959	1.0835	0.0074558	-0.537175	-3.59246	-4	-4	-4	-1.28868	nrxn3b_ENSDARG00000062693
1.91119	0.382518	1.18001	0.703279	-0.832121	-4	-4	-3.74037	-4	-1.90143	olfm1b_ENSDARG00000014053
2.11352	0.906598	0.00613354	0.809736	-0.687763	-4	-4	-3.77523	-4	-1.96787	trim46a_ENSDARG00000012367
1.27315	1.4148	1.00813	-0.412482	0.686202	-3.18827	-4	-4	-4	-1.50474	myo10l1_ENSDARG00000074723
1.21866	1.33566	0.583429	0.0288397	1.07687	-4	-4	-4	-3.97116	-1.3862	disp2_ENSDARG00000042846
1.34726	0.735409	1.28935	-0.247344	1.06559	-3.34274	-4	-4	-4	-2.33151	kif1aa_ENSDARG00000061817
1.89871	1.01808	0.545583	-0.197734	0.564469	-4	-4	-4	-4	-2.2263	si:ch211-272b8.6_ENSDARG00000091607
0.553292	1.28998	1.56451	0.530594	0.199342	-3.49392	-4	-3.38203	-3.83341	-1.85566	dpysl3_ENSDARG00000002587
0.724391	1.21967	1.17078	0.679245	0.740332	-4	-3.8175	-3.52645	-3.86934	-2.04698	etv1_ENSDARG00000101959
1.1184	1.5333	1.18283	0.539728	-0.0948519	-4	-4	-4	-4	-2.52145	ngfrb_ENSDARG00000089223
0.901055	1.98939	0.915752	-0.271334	0.0813379	-4	-4	-4	-3.97177	-2.0083	sult4a1_ENSDARG00000101967
1.45024	0.460411	1.6665	-1.3335	0.604287	-4	-4	-4	-4	-0.448	tspan2b_ENSDARG00000059202
0.38807	1.27976	1.69724	-0.816288	0.963931	-4	-4	-4	-4	-1.09192	zgc:153615_ENSDARG00000038981
0.743796	1.606	1.47139	-1.68101	0.720241	-4	-4	-4	-4	-1.13848	iffo1a_ENSDARG00000062976
-0.179425	1.948	1.44401	-0.0431035	-1.10348	-4	-4	-3.58152	-2.84456	-0.232374	grm8a_ENSDARG00000077654
0.0313842	2.46772	0.0531338	-0.214946	-1.73634	-3.54993	-2.9219	-2.54993	-3.4244	-0.384871	fmnl2b_ENSDARG00000075041
1.0659	2.01981	0.475829	0.220627	-1.74713	-4	-2.53273	-4	-4	-0.485427	fam219ab_ENSDARG00000013813
1.10145	0.605256	1.85535	0.553337	-1.24044	-4	-4	-1.83133	-3.84925	-1.19963	TOM1L2_ENSDARG00000056394
0.699082	0.823889	2.29127	-0.516086	-1.60987	-3.76907	-4	-2.63156	-3.09099	-1.69868	zc3h12b_ENSDARG00000062463
0.283793	2.03715	1.4213	-0.823122	-0.0773057	-4	-4	-2.32193	-4	-2.20163	tcp11l1_ENSDARG00000031890
1.04786	1.16287	1.12682	-0.119784	-0.0249659	-1.24097	-1.26597	-1.11751	-4	-1.94203	MYADM_ENSDARG00000038709
0.633136	1.40051	0.72411	-0.798117	0.955633	-0.571346	-1.96039	-0.926441	-4	-2.65227	rab6bb_ENSDARG00000031343
1.31885	1.61339	0.724608	-2.05966	0.0851086	-2.64463	-1.87909	-0.718626	-4	-1.24774	kcna2b_ENSDARG00000102064
1.21414	0.341299	0.678185	0.0529857	0.951106	-3.29097	-1.82148	-1.09902	-0.912457	-1.12351	ank3b_ENSDARG00000077582
0.416705	0.585241	1.18239	-0.565898	1.2115	-3.77844	-1.61617	-0.197301	-1.42929	-1.93554	bbx_ENSDARG00000012699
0.808691	1.11476	0.268817	-0.659033	1.40968	-3.63807	-2.43162	-0.624268	-1.58363	-1.55715	hoxd4a_ENSDARG00000059276
0.844178	-0.196961	1.15564	0.343608	1.26788	-3.11582	-1.7939	-0.723507	-2.16163	-2.36094	syngr3b_ENSDARG00000025034
0.894457	0.579368	1.47189	0.0824419	0.689587	-2.30816	-2.88862	-1.7172	-1.9506	-1.72922	zeb2b_ENSDARG00000078416
1.10873	0.26556	0.910571	0.538946	0.983551	-2.88999	-2.4598	-1.77296	-2.43983	-0.895083	uchl1_ENSDARG00000026871
0.679726	0.361013	0.65029	0.304126	1.68176	-2.58182	-2.53703	-2.00991	-2.60805	-1.51515	nbeaa_ENSDARG00000070080
1.86529	0.895663	0.217591	0.158698	-0.104337	-4	-1.20387	-1.31079	-2.20387	-2.31079	chd5_ENSDARG00000105083
0.871038	1.97639	0.228743	0.041657	-0.266465	-4	-1.04997	-1.42612	-2.81079	-2.52128	satb1a_ENSDARG00000057649
1.26251	1.08848	0.915778	0.752613	-0.261462	-3.27092	-2.47446	-1.51885	-2.1613	-2.23345	lrrc7_ENSDARG00000079670
1.62005	1.41896	0.698432	-0.135736	-0.536274	-3.26259	-2.8109	-1.33883	-2.44316	-2.29477	cacna1ba_ENSDARG00000021735
1.80497	1.14218	0.203304	-0.144046	0.588102	-4	-1.93546	-1.88101	-4	-2.77792	syt3_ENSDARG00000075830
2.08981	0.180786	1.00182	-0.91875	0.258789	-4	-2.2236	-1.06314	-4	-2.50371	colq_ENSDARG00000019692
1.30517	0.207561	-0.169509	0.458523	1.39659	-2.73586	-2.11437	-0.0787431	-3.62894	-3.85133	rac3b_ENSDARG00000020795
0.82974	0.83775	0.0688165	-0.343954	1.78643	-4	-2.10452	-0.449651	-4	-3.18337	hand2_ENSDARG00000008305
0.629946	0.961489	-0.356958	-0.665909	1.92621	-3.08814	-4	-0.102641	-2.87402	-4	tbc1d9_ENSDARG00000059900
-1.02272	1.53916	-0.27208	1	1.36632	-4	-2.60768	-0.245112	-4	-2.83007	kcnq3_ENSDARG00000060085
1.49291	0.932961	0.474562	0.365461	0.519301	-3.02227	-4	-0.329247	-4	-2.22872	ghrhrb_ENSDARG00000053708
1.23245	1.20801	0.0406234	0.293855	1.13516	-4	-4	-1.41069	-2.70615	-1.65251	si:dkey-161j23.7_ENSDARG00000092882
1.65037	1.41799	0.3944	0.486518	-0.54861	-4	-4	-1.32332	-2.99792	-1.917	tmem178_ENSDARG00000020758
1.5815	1.88251	-0.254997	-0.430084	-0.414654	-4	-2.79932	-0.779418	-4	-2.11126	cdk5r1b_ENSDARG00000045087
1.494	1.72728	-1.10955	0.370144	0.488713	-4	-4	-1.79404	-4	-1.42149	pcbp4_ENSDARG00000024276
2.16947	0.963023	-0.729922	-0.693022	0.786146	-4	-4	-1.78322	-4	-2.30001	map7d2a_ENSDARG00000068480
0.792627	1.2568	1.03292	0.188309	0.623086	-3.6885	-0.951535	-2.26064	-2.74097	-2.32593	celf3a_ENSDARG00000034668
1.06163	1.70801	0.979892	-0.566403	-0.0775732	-2.86468	-1.51718	-2.58803	-2.38934	-2.27581	rtn1b_ENSDARG00000021143
0.95058	1.14698	1.38597	0.332451	0.0303076	-2.39337	-2.39337	-1.68442	-3.18692	-2.66755	clstn2_ENSDARG00000060637
1.05976	1.11922	0.890366	0.262031	0.933631	-2.64578	-2.76403	-2.62653	-2.65133	-2.71673	alcama_ENSDARG00000026531
0.833875	0.74586	1.14279	0.955229	0.694898	-2.78084	-2.37484	-2.97348	-3.14857	-2.34788	dip2bb_ENSDARG00000016348
0.682077	1.30464	0.888052	0.539565	0.778753	-2.5167	-2.72821	-2.39117	-1.76668	-3.39117	clcn4_ENSDARG00000035808
1.40133	1.12358	0.676403	0.355933	0.616348	-2.57456	-2.97612	-2.90991	-2.05295	-3.32584	slit3_ENSDARG00000034268
1.27241	1.20011	1.074	0.417955	-0.0414766	-2.37851	-2.85385	-1.49716	-2.43004	-4	ttyh3b_ENSDARG00000007678
1.16616	1.27374	1.13567	-0.0427084	0.398707	-3.05311	-2.06455	-1.88487	-2.31919	-4	nrxn1a_ENSDARG00000061647
1.2888	0.960472	0.661733	-0.167977	1.27812	-2.98706	-2.44392	-1.9666	-2.79442	-4	ctnnd2a_ENSDARG00000062415
1.08799	1.33592	0.981998	-0.609448	0.988453	-2.64898	-2.29534	-1.8189	-3.49697	-4	dlgap2a_ENSDARG00000059340
1.14712	1.75809	0.825523	-0.0362152	0.028969	-2.4553	-3.09814	-2.84357	-2.42324	-4	adgrb1b_ENSDARG00000078529
1.05278	1.44323	1.33859	-0.0254979	0.11826	-2.86503	-3.5081	-2.23032	-3.27166	-3.89057	si:ch211-207d6.2_ENSDARG00000031658
0.645329	1.68516	1.18393	-0.711802	0.608976	-3.15978	-3.09838	-2.57482	-2.12876	-2.41656	tacr1a_ENSDARG00000035533
1.30577	1.02029	1.14091	0.129621	0.610876	-3.25408	-4	-2.23172	-2.87904	-2.32335	dock9b_ENSDARG00000016311
1.17315	1.23161	0.887984	0.243601	0.822787	-3.74328	-3.8377	-2.74328	-2.95754	-2.55105	nos1_ENSDARG00000068910
1.17817	1.03835	0.66596	0.596752	0.834006	-3.84331	-2.58028	-2.06651	-2.60453	-2.62919	dlg2_ENSDARG00000099323
1.34581	0.859086	0.41686	0.41686	1.28103	-3.64152	-3.27895	-3.05084	-2.88409	-3.25248	syt1a_ENSDARG00000030614
0.855104	1.54816	0.122857	0.733113	0.682074	-4	-2.64386	-2.14136	-1.08586	-4	slc7a14a_ENSDARG00000010816
1.01082	0.964811	1.06583	0.399748	0.884704	-4	-2.56768	-2.91561	-1.10825	-4	CDH19_ENSDARG00000100598
1.38963	1.55098	0.720755	0.0160301	-0.198414	-4	-2.70246	-2.16189	-1.10011	-4	smpd3_ENSDARG00000098226
0.480179	1.54291	1.41459	0.421285	-0.0574782	-4	-2.63316	-2.20432	-1.60568	-4	sh3glb2b_ENSDARG00000035470
1.39621	1.40408	-0.74763	-0.162667	1.14052	-4	-3.24239	-1.57254	-0.920467	-4	fsd1_ENSDARG00000062017
1.40873	1.55778	0.838411	-0.916477	0.253448	-4	-3.46902	-1.64799	-1.39863	-4	DGKI_ENSDARG00000063578
0.666215	0.772176	1.28762	-0.392286	1.24357	-3.33143	-3.9871	-0.614679	-1.95292	-4	atp8a1_ENSDARG00000063001
0.877638	0.263591	1.46798	0.240208	1.23864	-4	-4	-1.54686	-3.00223	-3.00223	antxr2b_ENSDARG00000063011
0.4122	0.836339	0.495	1.21694	1.35635	-4	-4	-1.95298	-2.47654	-3.22862	si:ch211-113g11.6_ENSDARG00000070442
0.849047	1.25421	0.176211	1.49395	0.51063	-4	-4	-2.09101	-2.26935	-4	soga3b_ENSDARG00000075455
1.55343	1.20333	0.682938	0.496525	0.381508	-4	-4	-2.62449	-2.13906	-4	RNF157_ENSDARG00000057481
1.69918	1.08059	0.489491	0.954391	-0.234821	-4	-4	-1.99914	-2.86101	-4	P2RY6_ENSDARG00000100878
1.09519	0.152524	0.124142	1.22559	1.28234	-0.995322	-4	-1.92444	-3.30691	-4	KCNG2_ENSDARG00000035961
0.150025	-0.102362	1.31797	0.970047	1.52785	-2.14543	-4	-1.98037	-3.73039	-3.8679	si:dkey-225f23.5_ENSDARG00000104930
1.38723	0.422635	0.692938	1.1224	0.579875	-2.0368	-2.85622	-1.55137	-4	-4	ttbk1b_ENSDARG00000056659
1.0993	0.982167	0.982167	0.423872	0.953167	-2.14532	-3.20945	-2.49896	-4	-3.27657	scn1lab_ENSDARG00000062744
1.2168	1.23683	1.02684	0.333862	0.490405	-2.57096	-2.62779	-2.6736	-3.57717	-4	rims3_ENSDARG00000062305
1.15572	0.823514	0.914751	0.18538	1.18292	-2.35007	-4	-1.58828	-3.59088	-4	cacnb1_ENSDARG00000002167
1.75096	0.494974	1.02253	0.0901323	0.734801	-2.20163	-4	-2.35918	-4	-4	scdb_ENSDARG00000030265
0.245544	1.66623	0.131144	-0.215506	1.55055	-2.09592	-4	-1.18032	-3.748	-4	npdc1b_ENSDARG00000056156
1.18884	0.942503	0.0957848	-0.25184	1.70572	-2.38767	-3.36036	-1.84309	-4	-4	camk2n1a_ENSDARG00000025855
0.69825	1.32922	0.589021	0.971268	0.827533	-3.14975	-4	-1.20489	-4	-3.66432	oprl1_ENSDARG00000071209
0.458685	1.50915	0.797709	0.961748	0.751662	-2.69226	-4	-2.73533	-4	-3.65044	stxbp1a_ENSDARG00000001994
0.0281969	1.16146	1.81097	0.783659	0.0126	-4	-3.18903	-1.51096	-4	-4	GRIK3_ENSDARG00000077715
1.17406	1.44866	0.64089	1.06239	-0.773188	-3.32778	-4	-0.819983	-3.57289	-4	dock3_ENSDARG00000063180
1.25169	1.13861	1.03833	1.28333	-1.08956	-4	-4	-1.33647	-4	-4	erc1a_ENSDARG00000009941
1.23913	0.437847	1.9503	-0.382829	-0.240225	-3.32769	-4	-0.627248	-4	-4	gabbr1b_ENSDARG00000016667
1.46761	-0.0245633	1.32336	0.957105	0.438837	-3.33199	-4	-1.87256	-4	-4	CELF6_ENSDARG00000101933
1.1756	-0.274525	1.36991	0.276027	1.37224	-3.65595	-4	-1.33403	-4	-4	PLD5_ENSDARG00000063257
1.29377	0.141586	0.836623	0.696725	1.38075	-4	-3.29951	-2.18404	-4	-4	enox1_ENSDARG00000060243
1.32023	0.765502	1.23036	0.760507	0.372457	-4	-4	-1.88753	-3.53662	-4	ret_ENSDARG00000055305
1.75175	0.93445	1.01951	-0.111056	0.334588	-3.91434	-3.82242	-1.84034	-4	-4	si:ch73-389b16.2_ENSDARG00000103802
1.58142	1.03422	0.440367	0.066581	-0.412991	-2.90438	-1.56996	-0.513058	-1.2918	-2.15492	ddr1_ENSDARG00000078523
1.36077	0.590248	0.857481	-0.110479	0.53094	-2.48428	-1.32009	-1.01551	-1.04133	-2.44614	hoxc4a_ENSDARG00000070338
1.2186	1.12941	0.754244	0.268817	0.206756	-3.30104	-1.19251	-1.6006	-1.17176	-2.97911	dpp6b_ENSDARG00000024744
1.84286	0.304266	0.681968	0.350892	-0.584312	-2.47184	-1.06585	-1.0523	-1.38437	-3.2088	slc4a10a_ENSDARG00000063133
1.59631	0.381829	1.22136	-0.442887	-0.0126474	-2.74057	-0.899266	-1.32553	-1.25944	-3.15561	arfgef3_ENSDARG00000077656
1.66738	0.58703	0.872621	-0.145603	-0.955547	-2.70078	-1.77449	-1.73151	0.222599	-2.6734	madd_ENSDARG00000003495
1.13035	0.113175	0.401896	0.481015	1.01487	-3.9486	-0.577042	-1.24816	-0.333891	-4	nalcn_ENSDARG00000001835
0.652007	-0.234783	1.07072	0.110546	1.65323	-4	-2.54767	-1.50327	-0.646799	-4	hoxa1a_ENSDARG00000104307
1.24737	1.34506	0.137442	0.787459	-0.0212081	-3.58791	-1.08221	-1.26598	-1.83201	-4	gab2_ENSDARG00000105120
1.50989	0.351448	0.98276	0.212374	0.588963	-3.81673	-0.952278	-1.10668	-2.78571	-4	numbl_ENSDARG00000101949
0.981276	1.1176	0.914781	0.570564	0.633943	-3.90625	-1.95516	-1.16928	-2.60369	-4	nrg2b_ENSDARG00000086585
1.58781	0.373908	1.49697	0.587805	-1.31342	-4	-2.2716	-0.991489	-1.94145	-4	pitpnab_ENSDARG00000044091
1.58393	0.431929	0.946502	1.11286	-0.416068	-4	-2.22342	-1.22342	-2.96039	-4	mpp3a_ENSDARG00000015184
1.66059	1.13344	0.778857	0.558892	-0.484177	-3.97603	-2.27559	-1.87322	-2.46968	-4	gfra1a_ENSDARG00000099732
-0.354932	1.84774	0.839947	-0.308011	-0.00233257	-3.18633	-0.881478	-0.460014	-0.960913	-2.95187	adam19b_ENSDARG00000067545
0.958334	1.7498	1.26295	-1.2616	-0.320019	-3.65392	-1.05897	-2.28469	-1.77945	-4	coro2ba_ENSDARG00000079440
-0.330841	2.12304	1.49096	-1.89563	-0.176808	-4	-1.83673	-2.02116	-1.78015	-4	reep2_ENSDARG00000031382
1.60632	0.936467	-1.02046	-1.24286	1.51098	-3.10793	-2.52296	-1.80676	-0.996419	-2.33032	kcng1_ENSDARG00000099038
2.11134	0.911507	-1.47162	0.265345	0.409391	-4	-3.37851	-2.29105	-1.33412	-2.24923	arhgef9a_ENSDARG00000061746
0.617417	0.452269	1.08805	-0.0154398	1.54497	-3.61878	-1.66101	-4	-1.44886	-1.82737	kcnd3_ENSDARG00000056101
0.595741	0.383172	0.996703	-0.349292	1.75508	-4	-2.21084	-3.35379	-2.49913	-0.91861	ptbp2b_ENSDARG00000015901
0.428843	0.43352	0.63779	-0.0500407	1.95647	-3.25298	-4	-3.44563	-1.60912	-1.49809	uhrf1bp1_ENSDARG00000077011
0.433104	1.04664	0.82267	0.829994	1.13798	-3.98836	-4	-2.84152	-2.43816	-1.21075	ttll7_ENSDARG00000062973
1.06378	1.55199	0.467559	-0.132215	1.08698	-4	-4	-3.66025	-2.86769	-1.61586	pnoca_ENSDARG00000025024
-0.0235473	1.99008	-0.572441	0.393771	1.09894	-4	-3.23987	-4	-2.0054	-1.02355	scml4_ENSDARG00000017266
0.715389	1.05611	1.02271	0.878995	0.727288	-4	-1.86659	-4	-2.33424	-2.35919	ptprt_ENSDARG00000074781
0.223162	0.640236	1.15786	1.60209	0.268626	-4	-1.3618	-4	-3.15698	-2.11516	ppp1r1c_ENSDARG00000038941
0.804097	1.19759	0.794439	0.314815	1.30804	-3.63938	-2.07788	-4	-4	-2.94972	phox2a_ENSDARG00000007406
1.14932	0.909213	0.783963	0.621843	1.10289	-3.88753	-1.73576	-4	-3.75961	-4	atp2b3a_ENSDARG00000043474
0.393382	1.24767	1.58686	0.728607	0.31092	-4	-1.83794	-4	-4	-4	clstn3_ENSDARG00000073883
0.335814	0.302261	1.4112	1.1936	1.19055	-4	-2.29977	-4	-4	-4	slc9a5_ENSDARG00000078560
1.40694	1.29906	1.02306	-0.0456824	0.126157	-2.7411	-0.885369	-3.65967	-4	-4	UNC13A_ENSDARG00000061829
1.4017	1.41725	0.979199	0.148458	-0.254211	-3.68576	-0.835659	-3.41013	-4	-4	cntnap2a_ENSDARG00000058969
0.505254	1.69514	0.718796	0.490472	0.535812	-4	-0.706637	-2.98991	-4	-4	scn1ba_ENSDARG00000060222
0.329875	1.78287	1.31052	-0.104696	0.19258	-4	-0.949045	-3.56976	-4	-3.56976	tuba1c_ENSDARG00000055216
0.525953	1.46359	0.965762	0.436247	0.706435	-4	-0.470238	-4	-3.34775	-4	dscaml1_ENSDARG00000098057
0.817623	1.18587	1.44846	-0.241555	0.392317	-3.44746	-0.199531	-4	-4	-4	micu3a_ENSDARG00000078599
1.02737	1.13013	1.50864	-0.00197494	0.437557	-4	-0.943872	-4	-4	-4	spire2_ENSDARG00000003084
0.632077	1.09006	1.66518	-0.04791	0.709688	-4	-1.00594	-4	-4	-4	hmp19_ENSDARG00000102975
1.28166	0.737475	1.25738	0.711285	0.161643	-4	-0.784752	-3.93724	-4	-4	camk1gb_ENSDARG00000008788
1.15599	1.36423	0.880357	0.518561	0.413789	-4	-1.24419	-4	-3.13053	-4	dscamb_ENSDARG00000028118
1.61003	1.42697	0.468788	0.472904	-0.0576107	-4	-1.60738	-4	-2.69702	-4	mdkb_ENSDARG00000020708
1.42679	1.43963	1.1026	0.264421	-0.360069	-3.37799	-2.09259	-4	-3.43313	-4	mapk8ip2_ENSDARG00000063157
1.61438	1.59301	0.781735	0.362111	-1.06215	-3.76259	-1.72306	-4	-4	-4	nlgn4a_ENSDARG00000079455
1.69868	1.57883	0.141276	0.357611	-0.190239	-4	-1.6007	-4	-4	-3.67567	npas4a_ENSDARG00000055752
1.99121	0.500731	0.766713	0.41879	-0.053581	-4	-1.8036	-2.60007	-3.848	-4	pomgnt2_ENSDARG00000010941
1.7885	0.828967	0.947664	0.0453605	0.528332	-4	-2.58142	-3.45943	-3.49896	-4	scn8aa_ENSDARG00000005775
0.437189	1.055	1.3859	1.11101	0.371065	-4	-2.64973	-3.03103	-2.88146	-3.81733	tuba1a_ENSDARG00000001889
1.06187	0.66453	1.22186	1.32935	-0.0300572	-3.27798	-2.27798	-3.95606	-2.95606	-4	si:dkey-84j12.1_ENSDARG00000075126
0.88779	0.980237	1.88248	0.276061	-0.723939	-4	-1.70782	-3.87774	-2.39232	-3.39232	itm2ca_ENSDARG00000043448
1.15318	0.934652	1.59852	0.731789	-0.778749	-4	-2.61871	-3.80313	-1.78683	-4	magi2b_ENSDARG00000073769
1.64013	1.30715	0.14425	0.632771	-0.289301	-3.50109	-2.00951	-1.04502	-4	-4	maptb_ENSDARG00000087616
2.02129	0.894322	0.0474787	0.498393	-0.00537317	-2.74953	-2.42761	-1.71391	-4	-4	ttbk1a_ENSDARG00000056019
1.03507	1.74116	0.45838	0.340631	0.43676	-2.72815	-1.76236	-2.92079	-4	-4	elavl4_ENSDARG00000045639
1.36201	1.44245	0.804762	0.359579	0.0630151	-3.20602	-1.87259	-3.14943	-3.45756	-4	anos1b_ENSDARG00000004932
1.02373	1.78479	0.892669	0.572818	-0.675758	-2.59193	-2.84568	-2.50173	-4	-4	ncam1b_ENSDARG00000007220
0.179465	2.29897	0.767339	-0.977404	-0.366678	-2.43197	-0.864929	-2.32888	-4	-4	mmp24_ENSDARG00000018896
1.15806	2.20713	0.415037	-1.54011	0.0931094	-4	-1.90689	-3.56986	-4	-4	ctnnd2b_ENSDARG00000003779
1.00525	1.00131	-0.245794	0.880905	0.862234	-4	0.457758	-4	-4	-3.81526	glrbb_ENSDARG00000052769
0.250894	2.05534	0.487728	0.86048	-0.81139	-4	-0.576925	-3.39635	-3.57693	-4	lingo1a_ENSDARG00000034165
0.0255643	0.790859	0.24152	2.12046	-0.0672727	-4	-0.779749	-4	-3.53107	-3.53107	cdh4_ENSDARG00000015002
1.50268	1.01435	-1.32296	1.7462	-0.235495	-4	-1.37543	-4	-2.88239	-4	rab3c_ENSDARG00000014462
1.26105	1.68847	-0.163976	0.0353331	-0.964667	-1.91886	-2.3339	-1.74894	0.230884	-4	atcayb_ENSDARG00000059781
1.57554	0.542463	1.47393	0.199938	-1.32953	-1.80952	-2.2501	-1.80952	-1.19947	-4	C9orf172_ENSDARG00000076873
1.86876	1.09115	0.716752	-0.14505	-1.48794	-1.32193	-3.26053	-1.14505	-1.52356	-4	scn8ab_ENSDARG00000018032
0.880063	1.72458	1.21001	0.364852	-2.87036	-2.32604	-2.1334	-2.50113	-0.995896	-4	igsf3_ENSDARG00000077002
1.44786	1.67088	1.16273	-0.880663	-1.98335	-3.05611	-2.3595	-3.59216	-0.610305	-4	nlgn3a_ENSDARG00000104786
1.60966	0.696078	1.0402	-0.243687	-0.222392	-3.56026	-4	-0.628649	-0.51425	-3.40826	efr3bb_ENSDARG00000069318
1.70792	0.690207	1.22802	0.320832	-1.00769	-4	-4	-1.47126	-1.12225	-2.56538	ank1b_ENSDARG00000074777
2.34828	0.68966	-0.581642	0.232802	-1.1917	-2.43962	-4	-1.85466	-1.04731	-4	tnk2a_ENSDARG00000090646
1.87753	1.27076	0.671214	0.399361	-2.50271	-4	-4	-2.53924	-0.769358	-4	xpr1a_ENSDARG00000062449
1.12048	1.60039	1.06817	0.158504	0	-4	-4	-1.78427	-2.57568	-3.46877	nrxn2b_ENSDARG00000063150
1.40072	1.56468	0.574786	0.479661	-0.56243	-3.93589	-4	-0.856161	-2.61396	-4	fibpb_ENSDARG00000087666
1.37783	2.03607	-0.570583	0.417444	-0.775201	-4	-4	-1.40198	-2.06318	-3.48945	fbxl16_ENSDARG00000060915
1.34626	2.05518	0.814433	-0.628086	-1.6467	-4	-4	-2.24106	-2.38993	-3.66556	epha7_ENSDARG00000004635
0.66415	1.99479	0.950672	0.886542	-1.79528	-4	-4	-2.38024	-2.79528	-4	dlgap1a_ENSDARG00000014280
1.47014	0.718129	1.2473	0.161964	0.395716	-3.17717	-4	-4	-1.77664	-1.68489	cacna1da_ENSDARG00000102773
1.43263	0.330752	1.41614	-0.219445	0.812404	-2.85688	-4	-4	-1.32636	-2.56737	pcyt1ba_ENSDARG00000058162
2.25229	-0.670538	0.969466	-0.00757322	-0.600149	-3.118	-4	-3.2555	-0.744539	-2.48997	hdx_ENSDARG00000079382
2.22893	0.63485	0.306504	0.0993463	-0.331692	-4	-2.1116	-4	-1.98249	-2.64827	anxa13l_ENSDARG00000013613
1.49985	1.21692	-0.0600306	0.302798	0.918839	-4	-3.20454	-3.87439	-1.37382	-2.84197	jakmip1_ENSDARG00000076090
1.33037	1.24248	0.411083	0.444635	0.786326	-4	-4	-3.09142	-0.858757	-4	thsd7ba_ENSDARG00000095022
1.06515	2.12029	0.0837684	0.190684	-0.394279	-4	-4	-4	-1.20163	-4	si:dkey-81e3.2_ENSDARG00000097406
2.12131	1.36264	-1.25528	0.0348794	0.200254	-4	-4	-4	-1.34363	-4	asic4a_ENSDARG00000025162
1.64824	0.559218	0.254558	1.32922	0.0856549	-2.76602	-4	-2.1866	-2.27823	-4	hoxb2a_ENSDARG00000000175
1.99128	0.595177	0.455902	0.883074	-0.327286	-2.50562	-3.29412	-3.29412	-3.05311	-4	jakmip2_ENSDARG00000053547
1.72167	0.818967	0.86526	0.608288	-0.104683	-1.45667	-4	-3.00416	-3.00416	-4	pcdh2ab9_ENSDARG00000101318
1.76002	1.08069	0.894767	-0.214473	0.137697	-1.753	-4	-3.16586	-2.91155	-3.57512	cacna2d1a_ENSDARG00000014804
1.34094	1.46202	0.406086	0.124244	0.75375	-2.35001	-3.90256	-3.72198	-2.35824	-3.70092	kif1ab_ENSDARG00000062024
1.53887	0.936712	0.0433803	1.06253	0.698375	-2.32425	-4	-4	-2.7228	-3.95984	syt7a_ENSDARG00000063568
1.49679	0.534628	1.07107	0.137323	0.876582	-2.42487	-3.35863	-4	-1.98583	-3.39611	slit2_ENSDARG00000004246
1.35556	1.38408	1.17144	0.153703	0.031413	-3.1836	-4	-4	-1.86167	-4	si:dkey-280e21.3_ENSDARG00000056519
1.07159	0.426775	1.56355	0.987626	0.101855	-2.24018	-4	-4	-2.29171	-3.48811	gdi1_ENSDARG00000056122
1.31888	0.960662	1.54953	0.531217	-0.511533	-2.43753	-4	-3.56682	-2.31889	-4	shank2_ENSDARG00000062325
1.32338	0.770066	1.59319	0.49847	-0.0383561	-2.63081	-4	-4	-2.72392	-4	unc5a_ENSDARG00000099034
1.48733	0.65175	1.43507	0.622002	-0.377998	-4	-4	-3.54792	-1.09946	-4	AP3B2_ENSDARG00000105296
1.62837	0.951241	1.04576	0.936134	-1.31179	-3.04876	-4	-4	-1.07913	-4	slc2a1a_ENSDARG00000001437
2.17608	1.08092	0.708951	-0.0565835	-1.37851	-4	-4	-4	-1.37851	-4	parp6b_ENSDARG00000070473
1.31968	1.37279	1.1373	0.868112	-1.00225	-3.1949	-3.41729	-4	-2.41729	-4	nlgn2b_ENSDARG00000079251
1.46623	1.29125	1.37624	0.540234	-1.75132	-3.24882	-3.24882	-4	-2.66386	-3.94397	ccsapb_ENSDARG00000040085
1.54311	1.14599	1.14599	0.832543	-1.09531	-4	-4	-4	-2.44003	-2.99343	trpm2_ENSDARG00000101641
1.40888	1.2953	0.731548	1.24918	-0.726897	-3.30645	-4	-4	-3.21232	-4	pcbp3_ENSDARG00000054378
1.88885	0.910319	1.11433	0.2114	-0.0957814	-4	-4	-4	-2.6565	-4	cacna2d2b_ENSDARG00000078169
1.82073	1.07333	0.75777	0.638581	-0.303907	-4	-4	-4	-3.16189	-3.98132	phf24_ENSDARG00000077596
1.02414	-1.81506	1.81247	0.680792	0.339755	-3.64514	-2.52966	-2.90817	-0.142638	-4	kctd1_ENSDARG00000074056
1.5383	-0.193681	1.22756	1.42407	-1.21036	-4	-4	-2.17719	-0.992768	-4	abhd8a_ENSDARG00000103518
1.36127	-1.08453	1.90611	1.14495	-1.10962	-3.62059	-4	-4	-1.21459	-4	drc3_ENSDARG00000041300
-1.4361	0.257798	1.40718	0.780219	1.49881	-2.52356	-1.52356	-4	-3.52356	-0.716207	ptprua_ENSDARG00000092638
-2.7761	0.201176	1.54582	1.93814	0.598935	-3.7761	-4	-4	-4	-1.68864	chrnb2a_ENSDARG00000008674
0.236272	-1.99639	0.382123	2.24393	0.83143	-1.12192	-2.25942	-4	-3.58135	-4	fam163b_ENSDARG00000073914
-0.615292	-1.66366	1.45056	2.35669	-0.0462712	-3.80116	-4	-3.66366	-4	-4	stmn1b_ENSDARG00000033655
-0.912733	0.470595	1.0794	-0.681408	2.16733	-3.85133	-2.04398	-1.68141	-4	-2.5294	nrg3b_ENSDARG00000089766
-1.0122	0.896507	1.69033	-1.18553	1.79516	-4	-2.49219	-4	-4	-1.61084	chga_ENSDARG00000008829
-0.442862	-1.35928	-0.121947	-2.24013	2.77246	-1.95382	-2.55329	-3.7397	-3.59768	-1.6204	hrasb_ENSDARG00000005651
-0.0443691	0.0935102	0.574637	-0.215328	2.26093	-1.9216	-4	-2.36217	-3.03202	-2.36217	hnrnpa3_ENSDARG00000059351
-0.590016	0.876302	0.0927941	-0.137504	2.34197	-2.83794	-4	-4	-3.51602	-2.51602	fscn1b_ENSDARG00000037747
0.339993	-0.436682	0.655378	0.851298	2.12195	-2.69302	-4	-3.54102	-4	-4	atp6ap1a_ENSDARG00000041417
-1.03562	-0.750222	-0.0814276	1.601	2.26358	-2.8657	-4	-4	-4	-4	sdcbp_ENSDARG00000030097
-1.36588	-0.742949	-0.49141	-0.0381918	2.82157	-3.36588	-4	-3.83981	-4	-4	cplx2_ENSDARG00000061918
0.194011	-0.371969	1.72048	-0.925453	1.97797	-3.40054	-4	-2.1375	-4	-4	ypel2a_ENSDARG00000077224
0.736966	-1.58496	1.16506	-0.796467	2.34792	-4	-4	-4	-3.45943	-4	ubl7a_ENSDARG00000024229
1.10148	-1.73891	1.41795	-1.94837	2.18092	-4	-4	-4	-4	-4	sept5a_ENSDARG00000013843
-1.45273	-1.3438	1.08916	-1.95523	2.69662	-2.37027	-3.42472	-4	-4	-4	fnbp1a_ENSDARG00000036156
-2.00988	-0.537397	1.4626	-1.14199	2.51211	-4	-4	-4	-3.08389	-4	tagln3a_ENSDARG00000079805
0.91619	0.782053	-0.124837	1.12309	1.1143	-4	-0.967296	-2.21057	-2.82528	-2.30171	brinp2_ENSDARG00000014302
0.901017	0.908531	0.220683	0.152706	1.57011	-3.28787	-1.68018	-2.72599	-1.5509	-3.28787	pcdh1gc5_ENSDARG00000104826
1.10957	0.905924	-0.362866	0.22387	1.55499	-3.19709	-0.744575	-2.69013	-2.15961	-4	kcnc4_ENSDARG00000061288
1.2815	1.32193	-0.058103	0.231853	1.10301	-4	-1.35311	-2.75607	-2.60407	-4	aplp1_ENSDARG00000098368
0.785037	-0.473951	0.750173	-0.710557	1.99142	-2.47153	-0.873713	-2.15154	-2.88334	-2.31566	nacad_ENSDARG00000012347
0.577703	1.08598	0.826156	0.535715	1.17168	-2.94443	-1.58369	-2.24399	-2.70342	-3.6225	fam20cb_ENSDARG00000090338
0.92556	0.399025	0.211721	0.262296	1.85622	-3.15653	-2.27518	-1.84375	-2.54648	-4	hoxb4a_ENSDARG00000013533
0.0382083	0.451382	0.240879	-0.479775	2.23926	-2.26595	-1.65184	-2.01647	-2.59525	-4	hipk1a_ENSDARG00000063594
-0.162789	0.376004	0.862547	0.163223	2.02445	-4	-0.726887	-2.71851	-4	-4	tubb5_ENSDARG00000037997
-0.00580562	-0.550611	0.617427	0.0399981	2.30444	-4	-1.34529	-1.31615	-4	-4	ppp2r2bb_ENSDARG00000099221
0.263713	-1.89775	0.86555	-0.238787	2.33814	-3.56071	-0.936224	-2.82375	-4	-4	wdr17_ENSDARG00000075098
0.868086	0.424881	0.36447	-0.383612	1.78779	-0.457193	-1.49114	-3.20163	-3.82456	-4	st8sia6_ENSDARG00000021195
1.00535	0.204662	-0.795338	-0.210375	2.18416	-0.994647	-2.22597	-3.74953	-4	-4	myt1la_ENSDARG00000008209
0.77689	0.850387	-0.0216951	-1.08424	2.13946	-1.77331	-2.63313	-3.48113	-3.80305	-4	kcnb2_ENSDARG00000038862
0.654073	0.207671	0.507231	0.733299	1.57639	-2.0522	-0.599684	-4	-3.30012	-2.71516	ywhag2_ENSDARG00000071658
1.00503	0.773327	0.959546	-0.240849	1.39834	-2.49202	-1.34557	-4	-3.87053	-2.60749	capn1b_ENSDARG00000052748
1.06038	1.16678	0.346968	0.140068	1.36727	-2.6472	-1.19201	-4	-4	-3.35347	dpysl5a_ENSDARG00000011141
0.595672	0.562828	1.34557	1.14145	0.541313	-2.51517	-1.14594	-3.04124	-4	-4	atp1a3a_ENSDARG00000018259
0.272512	0.58179	0.961456	0.804017	1.53602	-2.67135	-2.12734	-3.2785	-3.43798	-3.04656	cpe_ENSDARG00000055874
0.464593	0.649018	-0.0142907	1.2612	1.61143	-2.71473	-2.44464	-4	-3.40988	-2.8953	flot1a_ENSDARG00000001710
0.649187	0.625698	0.297838	1.15369	1.47814	-1.64611	-1.64611	-4	-4	-4	eef1a1a_ENSDARG00000039502
0.875623	1.05557	-0.451639	1.31311	1.23227	-2.74709	-1.65194	-4	-4	-4	gpr85_ENSDARG00000068701
1.15926	1.784	-0.657432	-0.0294009	1.06305	-2.30951	-1.65743	-4	-4	-3.5319	phyhiplb_ENSDARG00000070498
1.58421	0.590221	0.123271	0.102393	1.44022	-2.23221	-1.67582	-4	-4	-4	sgsm1b_ENSDARG00000075376
1.18907	1.04921	-0.144672	0.608018	1.42705	-1.87507	-2.3345	-4	-4	-4	tex2l_ENSDARG00000078132
1.48069	1.33099	-0.626904	-0.208678	1.45076	-1.98765	-2.35962	-4	-4	-4	SAMD14_ENSDARG00000101171
1.76189	0.998235	0.267633	0.167792	0.853613	-2.59448	-2.87808	-3.57245	-4	-4	ank2b_ENSDARG00000043313
1.76529	1.42636	0.152472	0.135499	0.448865	-3.17792	-2.65067	-4	-4	-4	dctn1b_ENSDARG00000056753
1.53387	1.0691	-0.528842	0.485212	1.3821	-3.0837	-2.79536	-4	-4	-4	bsnb_ENSDARG00000079161
1.04586	0.916301	-0.534683	0.180948	1.96626	-4	-2.05494	-3.7179	-4	-4	si:dkey-22l1.1_ENSDARG00000096743
1.7204	-0.155178	0.930845	1.26596	0.176498	-4	-4	-4	-2.61156	-2.6455	kcnn3_ENSDARG00000019753
1.99865	-1.09671	0.526219	1.18622	0.513673	-3.23807	-3.15561	-4	-3.74057	-3.51818	adam22_ENSDARG00000060532
1.67729	-0.835613	1.2943	0.814444	0.852825	-4	-3.39855	-4	-4	-3.27302	eno2_ENSDARG00000014287
2.4019	-1.46317	0.28406	0.429911	0.484359	-4	-3.68557	-4	-3.27053	-2.27053	fam131a_ENSDARG00000077022
2.50226	-0.971671	0.162184	-0.819668	0.716385	-4	-2.44116	-4	-4	-1.89367	APBB3_ENSDARG00000053771
2.3678	-1.14451	0.651759	-0.0876814	0.579514	-4	-2.22395	-2.82258	-4	-4	ccdc64_ENSDARG00000074761
2.22142	0.37707	0.979414	-0.359896	-0.338201	-3.40429	-2.08236	-4	-4	-3.81933	add2_ENSDARG00000074581
2.24056	-0.668794	1.32193	-0.121306	-0.0715533	-4	-2.78427	-4	-4	-3.36923	ACAP2_ENSDARG00000056478
2.27367	-0.0680184	1.00474	-0.506461	0.424498	-4	-2.926	-4	-4	-4	taok3b_ENSDARG00000094052
1.41883	-0.399931	0.0151069	-0.110424	2.13058	-2.39993	-4	-4	-4	-4	thsd7bb_ENSDARG00000061497
1.71751	-0.5158	1.03814	-0.485427	1.60909	-2.90046	-4	-4	-4	-4	kcnk2a_ENSDARG00000055123
1.89483	-0.566398	-0.690134	-0.15631	1.9751	-4	-4	-4	-3.75622	-4	atcaya_ENSDARG00000071678
1.32145	-0.527698	-0.163595	-1.35241	2.43383	-4	-4	-3.98713	-4	-4	si:ch211-157j23.3_ENSDARG00000092898
1.35685	-1.06238	0.0659453	-1.31872	2.41524	-4	-3.90368	-4	-4	-4	slain1a_ENSDARG00000019185
0.380047	0.0638323	0.680752	-0.869313	2.3674	-4	-4	-3.21872	-4	-2.85307	oxr1b_ENSDARG00000063310
0.331829	0.30712	0.945539	-0.578468	2.26426	-3.76382	-4	-4	-4	-4	tppp2_ENSDARG00000035338
0.376524	0.226076	0.653498	-0.576622	2.37722	-4	-4	-4	-4	-4	insm1b_ENSDARG00000053301
0.395929	0.928424	0.149289	-1.00543	2.36599	-4	-4	-4	-4	-4	stmn4_ENSDARG00000030106
1.78754	0.0403055	0.654414	-1.62021	1.76545	-4	-4	-3.11497	-4	-3.98944	scamp5a_ENSDARG00000018743
1.67948	0.386058	0.184425	-1.96758	1.99692	-4	-4	-4	-4	-4	ZNF608_ENSDARG00000075823
1.31646	0.555575	1.3328	-0.467808	1.03968	-2.59591	-0.970308	-4	-4	-4	pcdh2ac_ENSDARG00000099783
1.39955	0.907696	1.23477	-0.709834	0.964527	-4	-0.899659	-4	-4	-4	trim46b_ENSDARG00000058649
0.702646	0.0975051	1.51913	-0.63946	1.7641	-4	-1.74481	-4	-4	-4	fmn2b_ENSDARG00000061778
2.18959	-0.110457	0.994241	-1.56215	0.716707	-3.84226	-1.12605	-4	-4	-4	hspa4l_ENSDARG00000053544
-0.417611	-0.626707	2.7504	-1.76553	-0.286367	-4	-0.406207	-4	-4	-4	ntrk3b_ENSDARG00000086214
0.873354	1.18033	1.41299	-1.30029	1.42826	-3.1416	-4	-4	-4	-4	ppp3cb_ENSDARG00000025106
0.963601	1.26376	1.48135	-2.27798	1.25859	-4	-4	-4	-4	-2.40352	rundc3ab_ENSDARG00000002546
1.26493	1.04138	1.30149	-2.80986	1.53143	-4	-4	-4	-4	-4	mturn_ENSDARG00000074505
0.965603	0.694034	2.50605	-1.93357	-1.44815	-4	-4	-3.48997	-4	-4	rundc3aa_ENSDARG00000007245
1.41257	1.02146	0.74119	-1.11188	0.903282	-2.33089	-2.13234	-1.50674	-1.39126	-2.80219	myo9ab_ENSDARG00000073843
1.24667	1.00553	1.23765	-0.685838	0.665595	-1.70341	-2.81105	-1.89606	-2.30437	-2.91367	clasp2_ENSDARG00000020345
1.76875	0.551434	0.452887	0.543659	0.0801155	-2.04744	-3.29579	-2.05754	-1.21255	-2.13386	itsn2a_ENSDARG00000000161
1.62612	1.06722	0.743138	0.408451	-0.459883	-1.59739	-2.77122	-2.47056	-1.71092	-2.97902	mark4a_ENSDARG00000023914
1.02901	0.850939	0.962544	-0.291213	0.759119	-0.773229	-4	-0.463274	-2.04824	-3.16853	jph3_ENSDARG00000102204
1.918	-0.0246034	-0.0131077	0.460823	0.734126	-1.40543	-4	-1.20903	-1.8611	-3.0835	lrfn4b_ENSDARG00000078078
1.86954	0.830369	-0.26539	-1.35285	1.05087	-1.5455	-3.93782	-1.03092	-2.03092	-2.93782	pcdh1g22_ENSDARG00000103013
0.785828	1.23898	-0.586628	-0.540936	1.60143	-0.216934	-3.01602	-1.55135	-2.43748	-4	ampd2b_ENSDARG00000029952
1.2108	-0.369036	0.0188899	-0.946345	2.01889	-0.583775	-2.83616	-1.49736	-2.6017	-4	prdm2a_ENSDARG00000090721
0.52063	0.473324	0.529067	-0.668996	1.85268	-0.315569	-4	-2.87063	-0.892998	-4	map7d2b_ENSDARG00000045316
0.756927	1.96887	-1.1683	0.284488	0.555485	-2.7102	-4	-2.04277	-0.297816	-4	FAM189B_ENSDARG00000079008
0.66639	2.08143	-1.32193	-0.691162	1.05479	-1.0282	-4	-2.57568	-1.27612	-4	si:dkey-12h9.6_ENSDARG00000056092
0.758816	1.26239	0.988365	-0.013583	0.938851	-1.63807	-3.96	-2.03717	-1.65015	-3.84452	si:dkeyp-120h9.1_ENSDARG00000020278
0.128898	1.46555	1.88058	-1.39274	0.113401	-1.69707	-4	-1.42858	-2.45606	-3.28204	mapk9_ENSDARG00000077364
1.15745	0.205542	1.13279	-1.7252	1.65851	-1.81831	-4	-1.47727	-2.02476	-4	PDE1C_ENSDARG00000090398
1.26266	2.26731	-0.285542	-1.76553	-0.206107	-2.20611	-4	-1.10657	-3.01346	-4	slit1b_ENSDARG00000099446
0.679508	-0.285043	2.12649	-0.327687	0.295243	-0.863019	-2.32769	-4	-1.2711	-4	fam57ba_ENSDARG00000026875
1.39088	0.958913	0.879277	0.32918	0.633641	-1.14062	-1.93799	-4	-4	-4	cbarpb_ENSDARG00000071325
1.17716	1.3902	0.574233	0.618486	0.575781	-2.27718	-2.57416	-4	-3.43042	-3.48105	lrrc38b_ENSDARG00000087745
1.69866	0.82382	0.76417	0.435401	0.411466	-2.04529	-2.95956	-3.95956	-3.23373	-4	amph_ENSDARG00000007663
1.22667	1.29615	0.0976835	0.753529	0.805291	-0.62894	-4	-4	-4	-4	tmem184bb_ENSDARG00000091956
1.46494	1.05689	0.841241	0.380336	0.519313	-1.43719	-3.00793	-4	-4	-3.51043	kif21a_ENSDARG00000061131
0.698233	1.65338	0.575376	0.838411	0.441075	-1.45705	-2.91648	-4	-4	-3.91648	MAPK8IP1_ENSDARG00000090326
1.16611	1.85924	0.697437	0.380964	-0.332007	-1.64652	-3.76199	-4	-4	-4	kcnq2b_ENSDARG00000091130
1.28856	0.730354	1.61511	0.326632	-0.129047	-1.04888	-4	-2.86601	-4	-4	hecw1b_ENSDARG00000004291
1.33043	0.209289	1.4863	0.0181473	0.905673	-0.981853	-4	-3.08139	-4	-4	cadm3_ENSDARG00000057013
1.34507	0.933021	1.10956	-0.184942	0.853362	-0.62829	-4	-4	-4	-4	dner_ENSDARG00000061031
1.52243	1.30826	1.01445	-0.990144	0.65494	-1.42372	-4	-3.3431	-3.73738	-4	astn1_ENSDARG00000068323
0.708714	1.11313	1.37155	0.2699	0.954912	-1.81201	-4	-4	-2.7833	-4	adcyap1b_ENSDARG00000027740
0.168477	1.44249	0.858313	0.572447	1.32476	-2.11001	-4	-4	-4	-4	pcsk1nl_ENSDARG00000076170
0.689195	0.657101	1.59378	0.270305	1.0941	-2.2322	-2.78474	-4	-4	-4	paqr3b_ENSDARG00000044253
1.27519	0.319588	1.70744	-0.377343	0.910782	-2.42364	-4	-3.53216	-4	-4	atp6v0a1b_ENSDARG00000015174
0.745033	0.401491	2.15537	-0.419539	0.592434	-1.867	-4	-4	-4	-4	rasd1_ENSDARG00000019274
1.74617	0.64112	0.175456	0.617233	-0.0092659	0.165608	-4	-3.80182	-2.72654	-4	ptger2a_ENSDARG00000011434
2.31316	-0.343954	0.177998	-0.0443941	0.203533	-0.500074	-4	-3.30743	-2.62936	-4	tecpr1b_ENSDARG00000074086
0.950245	0.36396	0.374833	0.374833	1.9022	-2.18185	-4	-3.32167	-3.15317	-4	adgrb3_ENSDARG00000059832
1.12353	0.615721	-0.355286	0.207881	1.98844	-1.65985	-4	-4	-4	-4	cart2_ENSDARG00000045832
1.3391	-1.25442	0.808589	0.808589	1.65247	-1.30689	-4	-4	-4	-4	wasf1_ENSDARG00000060349
1.02505	0.106703	0.0503954	1.28504	0.850555	-0.381488	-4	-1.14122	-2.9568	-1.9568	LRRC75A_ENSDARG00000076834
1.07455	-1.33562	-0.178083	1.34937	1.53834	-0.773029	-4	-2.89856	-2.03606	-2.8034	nrip2_ENSDARG00000079985
-0.12242	-0.665213	-0.311576	1.55527	1.91678	-1.31856	-3.05087	-2.71966	-3.68313	-2.4815	pcsk1_ENSDARG00000002600
0.388764	-0.259975	-1.23573	0.828926	2.11477	-1.12025	-2.89469	-0.972693	-2.18842	-4	apc2_ENSDARG00000063007
0.328313	-0.276386	-0.573197	1.2352	1.96966	-1.65609	-4	-1.34976	-2.28836	-4	kcnj2a_ENSDARG00000019418
-0.0298161	1.18615	0.028853	1.72389	0.564472	-1.72559	-2.50146	-3.64312	-3.11261	-1.8993	nek1_ENSDARG00000022350
0.372056	1.37947	0.0482678	1.61449	0.189996	-1.64289	-4	-1.8703	-3.64289	-2.584	adcyap1r1a_ENSDARG00000105201
0.23816	1.15754	-0.427421	2.10692	-0.197939	-1.58496	-3.2854	-2.70044	-4	-3.70044	csdc2a_ENSDARG00000041323
-1.40259	0.882816	0.212124	2.06502	0.551611	-0.817623	-3.81762	-1.81762	-4	-4	svopa_ENSDARG00000056833
1.15917	0.112475	-1.09106	1.14067	1.59926	-0.887525	-4	-3.55049	-1.55049	-4	igsf9bb_ENSDARG00000069467
0.135759	1.15402	-0.444617	1.70532	0.928601	-1.40397	-4	-3.45842	-1.69943	-4	sgk494b_ENSDARG00000086169
0.867311	0.172525	-0.77938	1.73697	1.31225	-2.71012	-4	-4	-1.09541	-4	pdzrn4_ENSDARG00000045687
2.23551	-0.15014	-1.10434	1.35509	-0.46048	-1.93441	-3.10434	-3.51937	-2.51937	-4	CABZ01029822.1_ENSDARG00000086931
2.21583	0.453326	-1.54667	0.949752	0.230934	-2.76907	-4	-2.35403	-2.54667	-4	cacna1fb_ENSDARG00000023683
1.26689	0.904317	-1.10949	1.58239	0.931538	-1.80993	-4	-4	-4	-4	mcf2b_ENSDARG00000056603
1.54071	1.0137	-1.27455	1.23447	0.907655	-1.88753	-4	-3.97499	-3.97499	-4	marcksb_ENSDARG00000008803
1.87971	0.815575	-1.90689	-0.528379	1.19745	-0.370838	-3.64386	-2.64386	-3.64386	-2.22882	st3gal2_ENSDARG00000102369
2.17681	0.61735	-0.204545	-0.777214	0.832025	-0.955689	-4	-4	-4	-2.67105	slc6a4b_ENSDARG00000057017
2.37106	1.30133	-1.56242	-1.34483	0.0225426	-0.703282	-4	-4	-4	-4	CABZ01081780.1_ENSDARG00000063158
2.20958	-0.852704	-0.416605	-0.355204	1.30776	-0.852704	-2.61824	-4	-3.3552	-4	asphd1_ENSDARG00000075813
1.7778	-1.88293	-0.297968	-1.16304	2.0903	-0.882931	-4	-4	-4	-2.97039	cuedc1a_ENSDARG00000068716
0.760944	-1.18207	-1.55045	0.569054	2.37899	-0.777224	-3.00988	-3.74685	-4	-4	si:dkey-153k10.9_ENSDARG00000004386
1.20068	1.29976	1.32507	-1.87657	0.83713	-1.31097	-2.81998	-3.06099	-4	-4	zgc:162928_ENSDARG00000095034
1.05692	0.261387	1.29197	-1.67807	1.55206	-0.352197	-4	-2.96101	-3.8679	-4	stmn4l_ENSDARG00000043932
-0.0584423	-0.313439	0.973442	-3.14994	2.49666	-0.987669	-4	-4	-4	-4	mcf2b_ENSDARG00000097371
0.654073	1.63324	0.878679	-0.382586	1.17741	-4	-4	-1.85534	-3.01062	-4	SHC3_ENSDARG00000098909
1.03172	1.01457	0.553555	-0.338173	1.73347	-4	-4	-1.96487	-4	-4	snap25a_ENSDARG00000020609
0.55765	1.72064	1.31616	-0.916084	0.776735	-4	-3.24793	-2.53605	-3.19902	-3.89646	si:ch73-344o19.1_ENSDARG00000096791
1.01808	1.70801	1.2879	-0.954955	0.377621	-4	-4	-2.57234	-2.57234	-4	si:dkeyp-77h1.4_ENSDARG00000058248
1.33442	1.79234	0.913843	-0.786596	0.31774	-4	-4	-2.7866	-4	-4	slitrk4_ENSDARG00000079781
0.925935	1.26833	0.747937	-0.296457	1.44051	-2.97453	-2.63349	-4	-2.71149	-4	dtnbp1b_ENSDARG00000055206
1.43585	0.582326	0.8517	-0.8056	1.54068	-3.27273	-2.63227	-2.96787	-3.23091	-4	mapk8ip3_ENSDARG00000062531
1.02693	2.10382	0.125292	-1.2298	0.913788	-4	-4	-4	-3.0711	-3.33414	fstl5_ENSDARG00000040198
0.666518	2.04813	-0.265367	-1.36691	1.55394	-3.25143	-4	-4	-4	-4	sybu_ENSDARG00000060112
1.39189	1.64336	-0.139152	-0.859578	1.35693	-4	-4	-3.86707	-4	-3.86707	map6a_ENSDARG00000074521
1.66852	1.41814	-0.536053	-1.10979	1.58289	-4	-4	-4	-4	-4	lgalslb_ENSDARG00000055525
1.21122	0.648221	1.57674	-0.902287	1.22882	-4	-4	-2.635	-3.40054	-4	adgrb2_ENSDARG00000025667
1.4627	0.598989	1.69702	-0.231086	0.429931	-4	-4	-2.51649	-4	-4	myo3b_ENSDARG00000006892
1.83333	0.204104	1.27849	-0.0272215	0.700755	-4	-4	-2.92073	-4	-4	stxbp5l_ENSDARG00000006383
0.791413	1.10481	1.51259	0.245183	0.833327	-2.94883	-4	-4	-3.13524	-4	akap6_ENSDARG00000077295
0.790437	1.12853	1.42205	0.388883	0.926092	-3.27185	-4	-4	-4	-4	serpini1_ENSDARG00000034168
0.997391	0.0549786	1.44789	0.494891	1.36431	-3.09007	-4	-4	-3.98316	-4	srgap1b_ENSDARG00000045789
1.56559	0.635569	1.28254	0.107545	0.781686	-4	-3.8586	-4	-4	-3.13658	elavl3_ENSDARG00000014420
1.17127	0.599715	1.765	0.130871	0.616298	-3.98692	-4	-3.63328	-4	-4	mapk10_ENSDARG00000102730
1.40805	1.28723	0.755113	-0.0902288	1.01022	-4	-4	-4	-2.58592	-4	sgsm2_ENSDARG00000063307
1.01352	1.63429	0.817597	0.598479	0.216146	-4	-3.60621	-3.96376	-2.64184	-3.5375	galnt14_ENSDARG00000023448
1.34476	1.87562	0.136239	0.317623	0.256487	-4	-4	-4	-2.8987	-4	kcnc1a_ENSDARG00000051852
1.21703	1.20736	0.552803	0.490358	1.12314	-3.49378	-3.14328	-4	-3.33997	-4	scg2b_ENSDARG00000038574
1.17134	1.10658	0.520727	0.897998	1.11995	-4	-4	-4	-4	-4	phox2bb_ENSDARG00000091029
1.43347	1.10887	0.290619	0.53389	1.2488	-4	-4	-4	-4	-4	plcxd3_ENSDARG00000054794
1.68815	1.1086	1.10657	-0.276404	0.43497	-3.36916	-4	-4	-3.41496	-4	cacna1bb_ENSDARG00000079295
1.85662	0.989229	1.03577	-0.0764384	0.109117	-3.42694	-3.94151	-4	-3.57894	-4	syngap1a_ENSDARG00000063713
1.42918	1.11622	1.10001	0.445605	0.464146	-3.84975	-3.30346	-4	-4	-4	ntrk1_ENSDARG00000004586
1.77767	1.00411	1.03779	0.107223	0.333583	-4	-3.38029	-4	-4	-4	chrna3_ENSDARG00000100991
1.69937	1.08828	0.859277	0.389582	0.378207	-4	-4	-4	-3.60288	-4	scn1a_ENSDARG00000086819
1.75796	1.40878	0.499946	0.215393	0.179473	-3.82782	-4	-3.78934	-4	-4	kif26aa_ENSDARG00000042368
1.89814	1.15563	0.765763	-0.0840885	0.23604	-3.87738	-4	-4	-4	-4	nfasca_ENSDARG00000061099
1.48336	1.40346	0.246803	0.318875	0.851973	-3.43449	-4	-3.86333	-3.70579	-4	atp2b3b_ENSDARG00000023445
1.59666	1.73048	0.00215488	0.183993	0.459628	-3.43944	-4	-4	-4	-4	dnm1a_ENSDARG00000010042
0.861984	1.84241	0.869488	0.2175	0.45881	-4	-4	-2.57135	-4	-4	nadl1.1_ENSDARG00000015025
1.01615	1.67363	1.24913	0.00120275	0.0485085	-3.9988	-4	-2.65776	-4	-3.81823	nrcama_ENSDARG00000006396
0.533432	1.86986	1.14248	0.473931	0.152003	-4	-4	-3.09592	-4	-4	lin7b_ENSDARG00000037932
0.897503	1.25071	1.65312	0.425355	-0.0349338	-3.16304	-3.29232	-3.76876	-4	-4	dusp3a_ENSDARG00000061255
0.733567	1.90953	1.0878	0.244051	-0.0754902	-3.08746	-3.67243	-4	-4	-4	slc4a8_ENSDARG00000015531
0.752443	1.72581	1.34326	0.289709	0.227781	-3.69822	-4	-4	-4	-4	th_ENSDARG00000030621
0.921211	1.78095	1.24078	0.156463	-0.0827249	-4	-3.20611	-4	-4	-4	apba1a_ENSDARG00000103848
0.863244	1.60536	0.832019	0.649266	0.634777	-4	-3.46473	-4	-4	-4	scn4ab_ENSDARG00000034588
0.981504	1.59163	0.68422	0.880759	0.51916	-4	-4	-4	-4	-4	slc29a4_ENSDARG00000059690
1.11153	1.42598	1.15797	0.666664	0.120823	-4	-4	-3.80471	-4	-3.68653	cadpsa_ENSDARG00000043661
1.28211	1.10354	1.18641	0.976241	0.127711	-3.93598	-4	-4	-4	-4	zgc:165603_ENSDARG00000098702
1.38014	1.3012	0.989747	0.548755	0.507257	-4	-4	-4	-4	-4	celf4_ENSDARG00000070045
1.25537	1.26912	1.15125	0.490087	0.487951	-4	-4	-4	-4	-4	kif5aa_ENSDARG00000098936
1.11189	1.42663	1.22571	0.397479	0.373731	-4	-4	-4	-4	-4	fez1_ENSDARG00000023174
1.48715	1.47169	1.20616	0.250331	-0.672048	-3.06437	-4	-3.80133	-4	-4	pcdh2ab11_ENSDARG00000089593
1.6538	1.44706	0.952892	0.2662	-0.251199	-4	-4	-3.46419	-4	-4	ksr2_ENSDARG00000094526
1.68114	1.32868	1.2763	-0.296015	-0.222392	-4	-3.78598	-4	-4	-4	si:ch73-335m24.5_ENSDARG00000036383
1.69454	1.58946	0.911813	-0.0950403	-0.179929	-4	-4	-4	-4	-4	lrrc4.2_ENSDARG00000003020
0.790336	0.748301	1.61017	0.882379	0.423233	-1.73262	-4	-4	-4	-4	KCNQ2_ENSDARG00000029916
0.250996	0.625554	1.28759	1.61894	0.52539	-1.66591	-4	-4	-4	-4	necab2_ENSDARG00000056745
1.26118	1.11217	0.490807	1.20648	0.407332	-2.468	-4	-4	-3.96494	-3.40263	tph1b_ENSDARG00000036082
1.11533	1.15866	0.491133	0.821713	1.12585	-2.45563	-4	-4	-4	-4	stmn2b_ENSDARG00000070537
0.912537	0.924397	0.451403	1.47579	0.874615	-3.08746	-3.81538	-4	-4	-4	chrna5_ENSDARG00000003420
0.479594	0.814778	1.40559	0.968539	1.06209	-4	-4	-3.32038	-4	-4	prph_ENSDARG00000028306
0.556423	0.394103	1.21955	1.29583	1.15656	-4	-4	-3.28488	-4	-4	stmn2a_ENSDARG00000033234
1.14166	0.26748	1.30812	1.59637	-0.127614	-4	-4	-3.00765	-4	-4	ube2ql1_ENSDARG00000079276
1.42327	0.18377	1.34348	1.09049	0.448549	-4	-4	-4	-4	-4	vopp1_ENSDARG00000076373
0.802494	-0.0170842	0.645643	1.70579	1.25983	-4	-4	-4	-4	-4	slc18a3a_ENSDARG00000006356
1.32384	0.133022	0.436766	1.88044	0.356663	-4	-4	-4	-4	-4	myt1a_ENSDARG00000074030
1.26934	1.07651	0.791233	0.0595441	1.16486	-3.99513	-2.89343	-3.36234	-4	-2.96307	scn3b_ENSDARG00000062359
0.783314	0.941687	1.04888	0.464399	1.3442	-4	-2.89741	-3.29097	-4	-3.79621	vim_ENSDARG00000010008
1.19519	1.27262	1.22455	-0.143691	0.781051	-4	-2.82381	-3.28324	-4	-4	apba1b_ENSDARG00000074328
0.926612	1.73062	0.824952	0.120157	0.715582	-4	-2.70782	-4	-4	-4	nadl1.2_ENSDARG00000007149
1.03204	1.52519	1.06909	-0.569696	1.13269	-4	-3.15466	-4	-4	-4	rtn4r_ENSDARG00000090035
0.795611	1.37399	0.966779	0.527558	0.960613	-4	-4	-4	-3.69998	-2.60124	lrrn1_ENSDARG00000060115
1.19043	1.08412	1.11767	0.585048	0.817198	-4	-4	-4	-4	-2.75759	zgc:65894_ENSDARG00000016301
1.32985	1.44842	0.489799	0.541059	0.651617	-3.72112	-4	-4	-4	-2.64169	arpp21_ENSDARG00000061081
0.415895	1.57183	0.531619	0.0647546	1.57543	-4	-4	-4	-4	-3.01964	dpf1_ENSDARG00000099927
0.944438	1.36257	0.245325	0.147226	1.5347	-3.63876	-4	-3.36867	-3.47829	-4	CABZ01065679.1_ENSDARG00000062839
1.24001	1.14825	0.27175	-0.163882	1.63171	-4	-4	-4	-4	-3.30961	tlx2_ENSDARG00000011273
0.825053	0.948362	0.494777	0.354201	1.77653	-4	-4	-4	-3.8188	-4	fgf13b_ENSDARG00000056633
0.587972	1.01714	0.487288	-0.029494	1.98373	-4	-4	-4	-4	-3.63932	nmu_ENSDARG00000043299
0.482199	0.587235	1.33811	-0.207945	1.8456	-4	-4	-3.5178	-4	-4	nrsn1_ENSDARG00000044719
1.16367	0.813841	1.21068	-0.351334	1.49096	-4	-4	-4	-4	-4	kcnd2_ENSDARG00000032799
0.326032	1.52481	0.995884	-0.741082	1.68678	-4	-4	-4	-4	-4	opn3_ENSDARG00000052775
0.573911	-0.181232	0.671742	0.202844	2.19755	-4	-3.51355	-3.334	-4	-4	islr2_ENSDARG00000051875
0.119454	0.786261	1.11379	0.440751	1.77262	-4	-3.76928	-4	-3.83704	-4	vipb_ENSDARG00000079443
0.597423	0.739109	0.166942	0.902952	1.93556	-4	-4	-4	-4	-4	SLC25A1_ENSDARG00000080000
1.32501	1.13178	0.209537	1.27908	0.535023	-4	-3.13031	-3.22342	-4	-4	tagln3b_ENSDARG00000058394
1.79498	0.903542	-0.978095	1.163	0.714723	-4	-2.99799	-2.91999	-4	-4	ntrk2b_ENSDARG00000098511
1.77167	1.35223	-0.312503	0.0425919	0.914674	-3.51638	-4	-2.32373	-4	-4	arhgef7a_ENSDARG00000006299
2.09148	0.63773	0.341045	0.303537	0.366357	-3.89417	-3.82378	-3.14285	-3.99371	-3.67178	ANK2_ENSDARG00000009026
1.90012	1.3129	0.448959	-0.00225245	0.310631	-4	-4	-2.83233	-4	-4	lrfn5a_ENSDARG00000071230
1.89828	0.455411	-0.76922	0.69306	1.30154	-2.45989	-4	-4	-4	-4	tmem63c_ENSDARG00000004158
2.06922	0.0207586	-0.254876	0.451393	1.26727	-2.91784	-4	-4	-4	-4	agbl4_ENSDARG00000068050
1.57291	0.304283	-0.169233	0.728634	1.63664	-4	-4	-4	-4	-3.28817	fam117ba_ENSDARG00000074921
1.84613	0.956836	-0.0508262	0.0175291	1.22213	-4	-4	-4	-4	-4	cadpsb_ENSDARG00000070567
1.19216	0.814215	-0.446159	0.179577	1.9974	-4	-4	-4	-4	-4	EPB41L1_ENSDARG00000076364
0.211187	2.24283	-0.326874	0.507293	0.529598	-4	-4	-4	-3.4968	-1.82695	khdrbs2_ENSDARG00000069469
0.67942	2.3106	-0.0555047	-0.134074	0.335112	-4	-3.87823	-4	-4	-2.6766	bin1a_ENSDARG00000042114
1.04658	1.53756	0.0689756	1.22642	0.604146	-4	-4	-4	-3.29533	-4	fxyd6_ENSDARG00000100971
0.923297	1.74683	-0.154706	1.1511	0.570187	-4	-4	-4	-3.62419	-4	RASGRF1_ENSDARG00000073824
0.339373	2.15069	0.044075	1.24811	-0.221515	-4	-4	-4	-4	-4	entpd3_ENSDARG00000035309
0.888046	1.96199	-0.626203	0.997063	0.55589	-4	-4	-3.00084	-4	-4	vip_ENSDARG00000078247
0.500429	2	-1.18763	1.46263	0.475338	-4	-4	-4	-4	-4	her4.2_ENSDARG00000056729
0.0908628	1.9585	1.08146	0.315929	0.656966	-4	-4	-4	-4	-4	zmat3_ENSDARG00000080021
-0.641976	2.42561	0.501615	0.253687	0.306799	-4	-4	-4	-4	-2.82031	her4.4_ENSDARG00000009822
0.702265	2.05308	-1.12961	0.76569	0.870387	-4	-2.77347	-4	-4	-4	mmp16b_ENSDARG00000058876
-0.573185	2.49972	-0.953457	0.268935	0.676593	-4	-2.76081	-3.93074	-4	-3.47131	tmem35_ENSDARG00000052567
1.38983	1.67027	1.16283	-1.00872	-0.683878	-2.68388	-4	-4	-3.39015	-0.979862	cacnb4b_ENSDARG00000062174
0.954175	2.32791	0.470238	-1.15045	-0.791995	-1.66678	-4	-4	-4	-1.92489	syt14a_ENSDARG00000010934
1.34132	2.25068	0.341325	-1.26225	-1.154	-4	-4	-4	-4	-1.30022	gabbr1a_ENSDARG00000018967
0.551176	2.13683	1.19486	0.0749194	-1.86805	-1.66982	-4	-3.35571	-4	-4	vamp2_ENSDARG00000056877
0.887907	2.41437	-0.0467165	-0.569138	-0.569138	-1.3963	-3.3505	-4	-4	-4	ptchd1_ENSDARG00000018066
1.17625	2.39542	-0.156993	-0.516321	-1.39079	-1.41776	-3.44524	-4	-4	-4	hmx3a_ENSDARG00000070955
0.417034	2.44078	0.232065	0.278932	-0.941266	-3.58896	-4	-3.79542	-3.40839	-4	igsf9ba_ENSDARG00000033845
1.08852	2.23807	0.139236	0.279122	-0.774227	-4	-2.83477	-4	-4	-4	hcn4_ENSDARG00000061685
1.76659	2.08146	-0.245186	0.0720038	-1.26903	-4	-4	-4	-4	-4	caly_ENSDARG00000036008
1.34361	2.32134	0.729268	-1.28865	-1.72306	-4	-3.76259	-4	-4	-4	scn12aa_ENSDARG00000090724
1.53112	1.32826	1.09954	0.721024	-1.0984	-4	-2.86394	-2.6009	-4	-4	nsmfa_ENSDARG00000060025
2.15102	0.684935	0.962163	0.325854	-1.02778	-4	-3.19771	-3.19771	-4	-4	EML6_ENSDARG00000102755
1.43717	1.49652	1.21225	0.289786	-0.59732	-4	-4	-1.96655	-4	-4	prrt1_ENSDARG00000062208
1.63975	1.15332	1.61253	-0.487003	-0.718009	-4	-4	-2.74416	-4	-3.77979	shank1_ENSDARG00000060539
2.31518	0.210877	0.634401	0.399438	-0.63712	-3.89658	-4	-2.92125	-3.1068	-4	scg2a_ENSDARG00000103993
1.94358	0.448528	1.0788	0.943577	-0.847195	-4	-4	-4	-2.96749	-4	EML5_ENSDARG00000053517
2.12858	0.260937	1.18989	0.60296	-0.926898	-4	-4	-4	-4	-4	FAM135B_ENSDARG00000105121
2.42321	0.494765	0.423211	0.125531	-1.06711	-2.87447	-4	-3.45943	-4	-4	lrp1ba_ENSDARG00000004789
2.1486	0.71739	0.966562	0.500898	-1.40599	-2.89142	-4	-4	-4	-4	slc6a15_ENSDARG00000062821
1.78654	0.142682	1.99402	0.0171516	-1.59428	-3.17925	-4	-4	-4	-4	dtnbb_ENSDARG00000013020
1.2516	1.18703	1.70745	-0.559935	0.187032	-3.8611	-4	-4	-2.90292	-4	ppp3ca_ENSDARG00000004988
1.45453	1.67039	1.13659	-1.20539	0.36507	-4	-4	-4	-3.26429	-4	vwa5b1_ENSDARG00000059705
1.37582	2.03575	0.928362	-0.723715	-0.852998	-3.53107	-4	-4	-2.853	-4	sez6l_ENSDARG00000100594
1.88783	0.81867	1.46253	-1.34483	0.351165	-4	-3.40372	-4	-4	-4	rab11fip4a_ENSDARG00000090170
1.8669	1.09422	1.38307	-0.790578	-0.0691291	-4	-4	-4	-4	-4	chata_ENSDARG00000015854
2.40358	0.660988	0.1976	-0.641006	0.233655	-4	-4	-4	-4	-4	palm1a_ENSDARG00000026882
1.80029	1.9712	-0.741082	-0.319618	-0.28165	-3.74108	-3.37851	-2.848	-4	-4	trpc6b_ENSDARG00000067730
0.965327	2.54378	-1.65916	-0.659163	0.0412763	-4	-4	-2.43677	-4	-4	rab15_ENSDARG00000026484
1.5499	2.0618	-2.10545	-1.23099	1.02657	-4	-3.55291	-4	-4	-4	TMEM184B_ENSDARG00000090876
0.679056	2.81954	-2.63063	-1.04567	-0.651093	-4	-4	-4	-4	-4	st8sia5_ENSDARG00000036584
-0.682938	2.61936	-1.36883	-2.72247	1.41139	-4	-4	-4	-4	-4	dzank1_ENSDARG00000055787
-1.05261	1.90557	0.504603	-1.65834	1.63828	-2.09443	-1.48146	-1.93397	-3.85997	-4	plekhd1_ENSDARG00000091349
-0.582185	2.02799	-0.77483	-3.1127	1.89479	-3.9607	-1.63877	-2.07317	-4	-2.52774	kcnab2a_ENSDARG00000087247
-4	1.67893	0.445734	-2.06523	2.2422	-3.5798	-4	-2.06523	-3.5798	-4	fam19a5b_ENSDARG00000045608
0.885164	0.490395	0.400716	0.186865	2.00271	-3.6731	-4	-4	-2.33968	-4	lrrtm1_ENSDARG00000052713
-0.0688447	1.32887	-0.872153	-0.436054	2.29934	-4	-4	-4	-1.73722	-4	tubb2_ENSDARG00000039522
0.536342	0.81655	-1.25076	-0.259588	2.39074	-4	-4	-3.60832	-2.38592	-4	kcnc1b_ENSDARG00000032959
1.40169	0.195242	-1.53836	-2.05774	2.29747	-2.87717	-4	-3.37967	-1.05774	-4	socs7_ENSDARG00000077018
1.75111	-0.404808	-0.718917	-1.53605	2.13233	-4	-4	-3.92837	-1.17348	-4	ssh1b_ENSDARG00000010031
0.826341	1.77708	-0.794755	-2.31832	1.86904	-4	-4	-3.73335	-1.82646	-4	si:ch73-60h1.1_ENSDARG00000078504
0.60248	0.444939	1.39794	-1.59254	1.89425	-3.2555	-3.84046	-4	-2.2555	-4	thsd7aa_ENSDARG00000061479
1.48625	-0.273138	1.26471	-1.7902	1.71377	-4	-4	-4	-1.32625	-4	rap2ab_ENSDARG00000040246
1.43867	0.325211	1.09844	-4	1.67313	-4	-4	-3.45615	-0.932587	-4	flrt1a_ENSDARG00000102508
1.56767	-1.03437	-0.227012	-4	2.49367	-4	-4	-4	-4	-4	tusc3_ENSDARG00000078854
0.163114	0.0782252	-2.55113	0.121294	2.41104	-4	-1.39126	-2.90728	-3.2292	-0.769772	kctd12.2_ENSDARG00000053542
1.57923	-0.27684	-0.889817	-0.0885367	1.98127	-4	-2.19592	-3.27684	-1.88982	-2.93289	atp6v1e1b_ENSDARG00000030694
0.867752	0.420293	-2.90163	0.604718	2.18583	-4	-1.8375	-3.36107	-2.19114	-4	syn2a_ENSDARG00000045945
-1.5582	-0.890275	-1.85672	-0.924627	2.80362	-0.760507	-2.97774	-1.84023	-2.03288	-3.39278	kcnk1b_ENSDARG00000017254
-0.039181	-3.52812	-4	0.67423	2.79381	-3.98755	-2.52812	-2.63	-4	-4	zgc:194210_ENSDARG00000073799
0.869386	-3.96982	-1.99254	-0.992538	2.87646	-4	-4	-4	-4	-4	evlb_ENSDARG00000099720
1.29815	-0.660745	-2.43604	-4	2.48191	-4	-4	-0.290988	-4	-2.55152	ccdc149b_ENSDARG00000020857
0.71325	2.04629	-1.8324	-0.00523665	0.899904	-2.61667	-0.903953	-1.92862	-4	-3.08616	znf804a_ENSDARG00000027079
1.5808	1.9042	-2.45139	-1.02141	0.944735	-2.49204	-1.03636	-4	-4	-4	nlgn1_ENSDARG00000077710
1.16595	1.78213	-4	-0.488829	1.17351	-0.407693	-2.65281	-1.94826	-3.01538	-4	zgc:101731_ENSDARG00000040965
1.3502	2.04433	-2.03782	-1.10708	0.509073	-0.217643	-2.13093	-3.45286	-4	-4	ptpro_ENSDARG00000100422
-0.0478468	2.53991	-1.77367	0.00162192	0.408532	-1.34483	-2.66676	-4	-4	-4	syt9b_ENSDARG00000029239
0.832305	2.47524	-1.89441	-0.6485	0.118301	-1.31371	-3.8077	-4	-2.6485	-4	si:ch73-362m14.2_ENSDARG00000090164
1.7553	2.15385	-4	-0.3349	-0.534209	-1.70413	-2.70413	-4	-4	-2.48174	slc24a4a_ENSDARG00000015425
1.36248	0.103748	-3.38168	1.99683	0.71304	-0.88891	-4	-4	-4	-3.51096	RNF208_ENSDARG00000078056
1.32656	1.10725	-4	1.01844	1.54895	-1.37388	-4	-4	-4	-4	zswim2_ENSDARG00000075700
1.84452	-0.206107	-4	-0.843537	2.09506	-1.69153	-1.55403	-4	-4	-4	rdh8b_ENSDARG00000105060
1.06206	-0.883304	-3.63333	-0.392317	2.65544	-2.13856	-4	-4	-4	-4	cdk5r1a_ENSDARG00000037916
1.2299	-0.831877	-0.694374	1.77101	1.36189	-2.69437	-4	-1.56884	-4	-4	inab_ENSDARG00000053248
0.782769	-1.9542	-2.07973	0.764622	2.51069	-3.53916	-4	-1.7318	-4	-4	kcnh3_ENSDARG00000069560
1.27344	0.695506	-1.55663	0.397563	1.91369	-2.30029	-3.26713	-2.47863	-4	-4	SMARCA4_ENSDARG00000104339
-0.268252	1.09571	-2.65431	-0.358855	2.48803	-2.02628	-4	-2.46989	-4	-4	zgc:73340_ENSDARG00000102636
1.04647	2.09682	-3.46923	0.100621	0.998371	-4	-4	-1.42484	-4	-4	grm1a_ENSDARG00000026796
0.0582871	1.96458	-0.987228	0.136761	1.72102	-4	-4	-2.98723	-4	-4	crhbp_ENSDARG00000024831
0.669475	1.32456	-1.01858	0.750093	1.86316	-4	-4	-4	-4	-4	cntn2_ENSDARG00000000472
1.21613	1.47962	-1.49114	0.397828	1.60572	-3.74353	-4	-4	-4	-4	gria2a_ENSDARG00000070173
0.598973	1.3831	-1.78415	0.00592197	2.19007	-4	-4	-4	-4	-4	dync1i1_ENSDARG00000060948
0.342106	1.19898	-2.14975	-0.242857	2.36201	-4	-4	-4	-4	-2.44931	si:dkey-71l1.1_ENSDARG00000052411
0.992264	1.21133	-2.96193	1.49202	1.38974	-4	-4	-4	-3.08746	-4	slc45a1_ENSDARG00000004302
0.236198	0.0477531	-2.43991	2.1964	1.54035	-4	-4	-4	-3.50404	-4	gpr37b_ENSDARG00000033296
2.4064	0.492658	-4	-2.85526	1.47321	-3.72973	-4	-3.3147	-2.72973	-4	ssx2ipb_ENSDARG00000061602
2.89817	0.371239	-4	-0.882518	-1.7756	-4	-4	-3.16792	-2.46748	-3.84599	zpcx_ENSDARG00000059252
3.04098	0.0551416	-3.94486	-2.55254	-1.8574	-4	-4	-4	-2.18997	-4	rab34b_ENSDARG00000010977
