# Supplementary material for: Enteric glia as a source of neural progenitors in adult zebrafish
Source: eLife. 2020 Aug 27;9:e56086. doi: 10.7554/eLife.56086 (PMC7521928; doi:10.7554/eLife.56086)
Supplement: Supplementary file 4. — Genes displayed in the heat map depicting the nRNASeq data of this study were selected as follows: genes with a logFC (Cherry+ vs Cherry-)>0, padj (Cherry+ vs Cherry-)<0.05 and an average TPM of 3, and genes enriched in neurons in the Zeisel et al., 2018 dataset (logFC neuron vs. glia >0.2 and p-value<0.05). This analysis identifies 366 mouse ENS neuron-enriched genes that have orthologues present in our zebrafish Cherry+ transcriptome dataset, including phox2bb, ret, elavl3, elavl4, prph, vip, nos1, and likely reflect the neuronal component of our bulk dataset (See also Figure 2—figure supplement 2A,B). [file elife-56086-supp4.xlsx]

## Sheet: Suppl File 4 McCallum
Supplementary File 4
Table containing the order of heatmap genes and values for Figure 2-figure supplement 2B
PE_SOX10_1	PE_SOX10_5	PE_SOX10_3	PE_SOX10_4	PE_SOX10_2	PE_neg_4	PE_neg_3	PE_neg_5	PE_neg_1	PE_neg_2	geneID
1.55374	-2.76818	1.44127	0.479743	-0.768184	-1.52026	-0.768184	-1.68072	-1.44626	-0.72379	RAP1GDS1_ENSDARG00000073741
0.213125	-3.43073	-2.01569	2.20831	0.0503954	-1.37184	-1.31525	-1.92823	0.376624	-1.01569	ndufa4l2a_ENSDARG00000103114
0.0184372	-3.63691	0.35857	-1.19066	2.43455	-3.37388	-0.914449	-2.49941	-0.655062	-1.54945	hmgb3b_ENSDARG00000006408
-4	-1.66755	0.298504	-1.77189	2.03031	-4	1.5061	-0.393374	-1.23583	-4	nxph3_ENSDARG00000070694
2.48543	-4	-4	-0.206451	-4	-4	-0.447459	0.900464	-0.447459	-2.32193	tmem229b_ENSDARG00000060569
-0.162613	1.00337	0.730835	-0.507748	0.438784	-0.591093	-0.987189	-0.0125001	-0.870747	-0.562773	appb_ENSDARG00000055543
0.0451949	0.134809	1.18724	0.321332	0.780619	-0.782528	-1.53208	-0.405595	-1.46471	-0.782528	stau2_ENSDARG00000026801
0.408682	0.540965	0.384596	0.214671	1.08317	-1.02237	-1.97174	0.164631	-1.42033	-1.35399	atp6v1c1a_ENSDARG00000023967
1.13416	0.406781	0.93656	-0.041547	0.172128	-1.67512	-1.48585	-0.22183	-1.18777	-0.998734	fryb_ENSDARG00000056001
0.949801	0.636824	1.03503	0.0518616	0.26252	-1.75364	-2.30012	-0.373126	-1.42911	-0.773264	sorl1_ENSDARG00000013892
0.63341	0.431075	0.330805	0.488618	0.357306	-0.19709	-1.21995	-0.552871	-0.768506	-0.765139	rbms3_ENSDARG00000044574
1.00313	0.83486	0.424772	0.230843	-0.54149	-0.819343	-0.86254	-0.439849	-0.552059	-1.07983	mycbp2_ENSDARG00000001220
0.939051	0.913115	0.481627	0.199942	0.43625	-0.888527	-0.692855	-1.69909	-1.33819	-1.18677	vat1_ENSDARG00000056481
1.24939	0.636663	0.314196	0.369742	0.286975	-0.249353	-1.43632	-1.10534	-1.30626	-2.10534	synm_ENSDARG00000062350
0.626558	0.372892	0.189422	1.78126	-1.07712	-0.802647	-1.26485	-1.30015	-1.59662	-1.38287	zfr_ENSDARG00000027109
0.472858	0.903908	1.03183	1.16535	-0.779908	-2.16457	-1.57961	-1.57961	-0.976945	-1.08657	trib2_ENSDARG00000068179
1.22918	0.990283	1.03873	0.14736	-0.587437	-0.988099	-2.34834	-1.69674	-1.50911	-1.05502	kif1b_ENSDARG00000037020
1.15087	-0.393738	1.25608	-0.341626	-0.646857	0.740747	-1.59637	-1.40372	-0.711526	-2.23975	arfgef1_ENSDARG00000063474
0.891228	0.308296	1.47574	-0.912744	0.517585	-0.697804	-0.572952	-1.47192	-1.58798	-2.46497	plekha7b_ENSDARG00000062220
0.832871	-0.0247356	1.14157	0.859561	-0.259839	-1.77624	-2.79462	-0.813231	-0.679139	-0.414682	osbpl3b_ENSDARG00000040482
0.980758	0.357712	0.525657	0.585818	0.769406	-1.99345	-3.77268	-1.26789	-0.873614	-0.295637	dmxl2_ENSDARG00000091293
1.05349	0.772887	-0.277486	0.354073	0.0868727	-0.593932	-3.84643	-0.398099	-1.87274	0.363496	plxnb1a_ENSDARG00000075821
1.48059	0.0442318	-0.276698	0.587296	1.17226	-1.18484	-4	-1.7237	-1.39634	-1.2618	rufy2_ENSDARG00000062019
-0.662821	1.04076	0.780905	0.824358	0.220792	0.0128622	-0.912284	-1.41074	-2.08789	-0.985432	aclya_ENSDARG00000099079
-0.983632	0.406713	0.797075	0.653699	1.52146	-0.170378	-2.46741	-1.27283	-2.43687	-1.64798	vdac1_ENSDARG00000045132
0.536716	0.798866	0.885548	-0.465407	0.898815	-0.126161	-1.52838	-2.09132	-1.92431	-0.707768	pfkpa_ENSDARG00000028000
0.781953	1.38895	0.339571	-0.163155	0.691239	-0.313023	-1.4285	-2.07486	-2.98598	-1.52079	picalmb_ENSDARG00000014137
0.843797	0.684105	1.48357	-0.900858	0.565565	-0.233841	-2.57673	-2.31957	-3.61235	-1.03946	prkacab_ENSDARG00000016809
1.00015	1.00707	0.252966	0.0590272	0.346426	-1.67925	-0.853916	-0.985028	-1.04524	-0.666968	leng8_ENSDARG00000076805
1.11714	0.880644	0.987774	0.00992684	-0.278054	-2.16827	-0.987328	-1.11936	-1.48709	-0.664303	prkceb_ENSDARG00000069928
1.07718	0.284028	0.431248	-0.440308	1.05383	-1.89631	-2.14935	-0.944142	-1.16249	0.0711754	plekha6_ENSDARG00000020328
0.592286	1.15063	-1.01106	0.00732334	1.31087	-2.38957	-1.83703	-0.0580527	-2.04853	-0.696545	wbp2_ENSDARG00000056605
0.574314	-0.505334	0.474281	1.03857	1.38005	-1.12852	-1.16004	-1.39212	-3.60434	-1.35021	tm4sf18_ENSDARG00000060668
0.844178	-0.196961	1.15564	0.343608	1.26788	-3.11582	-1.7939	-0.723507	-2.16163	-2.36094	syngr3b_ENSDARG00000025034
0.778004	1.10731	0.157938	0.962244	-0.630881	-2.33747	-0.759205	0.0850588	-1.25947	-2.70004	bnc2_ENSDARG00000069989
0.71553	1.33484	0.47818	-0.619095	0.713158	-1.1882	-1.39784	-0.22564	-1.53398	-2.90949	srsf1b_ENSDARG00000017843
0.245996	0.714041	1.17517	0.435181	0.28183	-1.47664	-2.44841	0.412269	-1.75228	-2.49385	flot2a_ENSDARG00000004830
1.65747	-0.0875058	0.352875	0.585993	0.325704	-0.701987	-2.4844	-0.886666	-2.40943	-1.51354	rufy3_ENSDARG00000029692
0.964489	1.10477	0.753326	0.423331	0.389223	-1.89187	-2.31814	-1.25205	-1.52632	-1.62326	tshz3b_ENSDARG00000103361
1.29196	0.580461	0.774233	0.247218	0.676386	-1.69707	-3.28204	-0.632943	-2.34915	-1.69707	grid2_ENSDARG00000055302
1.64913	0.486122	-0.724729	0.839003	0.407016	-1.73049	-2.17271	-0.73627	-1.70759	-1.6739	mapta_ENSDARG00000089314
1.59263	1.32492	-0.744962	-0.118828	0.727106	-1.80714	-2.79969	-1.05087	-2.56671	-2.15167	map4l_ENSDARG00000068745
1.43733	0.547584	0.512639	0.674767	0.609413	-1.42621	-1.95737	-2.65729	-1.76264	-2.3313	nav3_ENSDARG00000005476
1.49849	1.08191	0.204368	0.622788	-0.353753	-0.449968	-2.36042	-2.13802	-1.7316	-2.96556	GNAZ_ENSDARG00000099844
1.3379	0.459724	0.394	0.133408	0.877679	-1.22186	-2.40118	-1.48864	-0.643153	-2.09633	dnajc6_ENSDARG00000079891
1.84518	0.0641303	0.605678	-0.964667	0.660453	-1.68046	-1.96467	-1.28224	-1.11151	-1.71429	rabgap1l_ENSDARG00000061757
1.41257	1.02146	0.74119	-1.11188	0.903282	-2.33089	-2.13234	-1.50674	-1.39126	-2.80219	myo9ab_ENSDARG00000073843
1.36077	0.590248	0.857481	-0.110479	0.53094	-2.48428	-1.32009	-1.01551	-1.04133	-2.44614	hoxc4a_ENSDARG00000070338
1.59631	0.381829	1.22136	-0.442887	-0.0126474	-2.74057	-0.899266	-1.32553	-1.25944	-3.15561	arfgef3_ENSDARG00000077656
1.2186	1.12941	0.754244	0.268817	0.206756	-3.30104	-1.19251	-1.6006	-1.17176	-2.97911	dpp6b_ENSDARG00000024744
1.66738	0.58703	0.872621	-0.145603	-0.955547	-2.70078	-1.77449	-1.73151	0.222599	-2.6734	madd_ENSDARG00000003495
0.560279	1.01467	1.20771	0.872814	-0.0407316	-1.3057	-3.0635	-1.35301	-1.4186	-3.29027	dpysl2b_ENSDARG00000032083
0.774745	1.28855	0.662479	1.04163	-1.07171	-1.52422	-3.96479	-0.684687	-0.602225	-4	uhmk1_ENSDARG00000059575
1.02901	0.850939	0.962544	-0.291213	0.759119	-0.773229	-4	-0.463274	-2.04824	-3.16853	jph3_ENSDARG00000102204
1.88054	1.10145	0.221027	0.331451	-0.623695	-1.77897	-4	-0.653442	-2.91648	-4	nbeab_ENSDARG00000105184
1.21281	1.42083	-0.769635	-0.184673	-0.037331	-0.00958605	-1.10912	-3.02339	-1.33151	-0.769635	gch1_ENSDARG00000070453
1.0627	1.17788	0.0665206	0.0716005	0.636992	-0.119235	-1.48449	-4	-1.68837	-1.48449	mab21l1_ENSDARG00000102047
0.859613	0.715038	-0.805116	-0.216431	1.41247	-0.707819	0.120294	-4	-1.18699	-1.90945	kcnma1a_ENSDARG00000079840
1.19944	0.560177	-0.128209	-0.389334	1.61067	-0.781651	-1.15716	-4	-2.02084	-2.52531	hoxb5b_ENSDARG00000054030
0.932052	0.914877	0.561839	0.665599	-0.993094	-1.54996	-1.70064	-3.0094	-1.76839	0.655294	pde10a_ENSDARG00000003449
1.65336	0.567205	0.470837	0.422581	-0.158705	-1.83458	-3.41954	-3.04917	-1.91911	-0.0122193	hoxa5a_ENSDARG00000102501
1.14259	0.970407	0.429046	1.46348	-1.13495	-1.67381	-1.87817	-3.49484	-2.70129	-1.16652	sgip1a_ENSDARG00000097897
1.0389	1.83709	0.658963	0.206451	-1.23412	-3.30451	-1.58205	-3.04148	-2.30451	-1.13459	kifap3b_ENSDARG00000006862
1.79598	1.03208	0.416581	-0.113505	0.349467	-2.27233	-1.90149	-3.80839	-2.738	-1.98057	pcloa_ENSDARG00000063299
0.708027	1.77437	-0.343812	-0.0965022	0.87858	-1.76276	-2.70136	-2.47897	-1.40368	-1.40368	ppm1ab_ENSDARG00000043250
-0.230654	1.62157	-0.411952	0.0927232	1.43536	-3.16684	-3.05992	-2.86728	-2.08592	-0.0826439	serinc1_ENSDARG00000009106
0.599943	1.17783	1.19311	-0.181196	0.364855	-2.00992	-0.379046	-1.79989	-1.52143	-3.14528	spag9a_ENSDARG00000074531
0.878475	0.263194	1.27315	-0.139904	0.60969	-2.16657	0.45384	-2.06274	-2.00384	-4	ndrg4_ENSDARG00000103937
0.785037	-0.473951	0.750173	-0.710557	1.99142	-2.47153	-0.873713	-2.15154	-2.88334	-2.31566	nacad_ENSDARG00000012347
0.98945	-0.059916	0.37777	0.680697	1.53112	-2.11577	-0.582337	-2.50572	-2.71984	-4	frmd4bb_ENSDARG00000076496
1.4217	0.255048	-0.34174	-1.35966	1.64259	-0.531843	-1.22216	-1.32404	-2.9267	-2.51166	zc2hc1a_ENSDARG00000027915
0.633136	1.40051	0.72411	-0.798117	0.955633	-0.571346	-1.96039	-0.926441	-4	-2.65227	rab6bb_ENSDARG00000031343
1.46752	0.903075	0.149715	-0.178668	0.989099	-0.238101	-2.12159	-1.91348	-4	-4	iqsec3a_ENSDARG00000099850
0.503766	1.0372	1.32193	0.66523	-1.35184	-0.422233	-0.189572	-1.93681	-4	-2.74416	dscama_ENSDARG00000024865
1.87324	0.712859	-0.0724696	0.559093	-0.480239	-0.473008	-2.16267	-2.44444	-4	-1.40262	pclob_ENSDARG00000098880
1.46957	0.185675	1.53129	-0.191321	-0.789888	-0.267137	-2.69958	-1.94313	-1.18151	-3.99376	arl4aa_ENSDARG00000099918
0.959218	1.23189	1.78091	-0.943266	-0.161734	-1.75771	-1.8431	-2.67709	-2.9912	-4	amigo1_ENSDARG00000079620
1.4565	0.81297	1.2761	0.356591	-1.60297	-1.56717	-0.610242	-3.40671	-1.75578	-3.56717	ndrg3a_ENSDARG00000013087
2.14942	0.932189	-0.291707	0.593255	-1.41246	-2.30228	-1.08596	-2.99742	-3.06781	-4	hivep3a_ENSDARG00000075928
1.47642	0.803655	0.650409	-0.102038	0.354125	-1.82758	-2.14148	-1.45459	-2.89081	-0.547322	ece2b_ENSDARG00000102142
1.10873	0.26556	0.910571	0.538946	0.983551	-2.88999	-2.4598	-1.77296	-2.43983	-0.895083	uchl1_ENSDARG00000026871
1.53375	0.474984	0.713075	-0.853272	0.747458	-2.86921	-2.86921	-1.74636	-3.03914	0.201176	camsap2a_ENSDARG00000062173
0.813408	0.583975	0.290987	0.871234	0.939758	-2.98136	-3.73138	-1.68302	-4	0.307039	GARNL3_ENSDARG00000060631
0.877301	1.65384	0.680609	0.407222	-0.135615	-2.28877	-4	-1.31204	-2.25456	-1.52664	srgap3_ENSDARG00000060309
0.364347	1.46973	0.971293	0.815375	0.0170086	-2.41541	-4	-1.43766	-2.92159	-1.05857	ptprnb_ENSDARG00000077047
1.14116	1.01147	1.40311	-0.0921498	0.223626	-1.36134	-2.9463	-2.12318	-3.64674	-2.32481	cacna2d2a_ENSDARG00000103390
0.904823	0.902456	1.60926	0.0358615	0.491361	-1.9049	-3.82428	-2.15802	-4	-2.59296	nav1b_ENSDARG00000058771
1.30153	1.51869	0.361152	-0.531933	0.500248	-1.80586	-2.26529	-2.33929	-4	-0.872969	dixdc1a_ENSDARG00000025302
1.32144	1.3848	0.363987	0.470493	-0.068306	-1.89638	-4	-2.97134	-4	-0.339076	cacna1ea_ENSDARG00000062346
0.771851	1.49596	0.690836	-0.0830557	0.757003	-2.10098	-4	-3.33544	-3.61555	-0.378512	syt11a_ENSDARG00000057913
0.733607	0.56469	1.91714	-0.439854	0.251807	-4	-4	-1.50027	-1.69291	-1.11884	myo5aa_ENSDARG00000061635
0.433104	1.04664	0.82267	0.829994	1.13798	-3.98836	-4	-2.84152	-2.43816	-1.21075	ttll7_ENSDARG00000062973
1.37357	-1.36869	1.75817	0.158561	0.787025	-4	-3.28622	-1.59817	-4	-1.45615	snap25b_ENSDARG00000058117
1.2693	1.11507	1.00075	-0.419313	0.451121	-3.81567	-2.7332	-3.6552	-3.37957	-0.134944	dmtn_ENSDARG00000013110
1.45024	0.460411	1.6665	-1.3335	0.604287	-4	-4	-4	-4	-0.448	tspan2b_ENSDARG00000059202
0.860286	1.07621	1.46253	0.748281	0.12332	-4	-2.55128	-4	-4	-1.81431	slc2a3a_ENSDARG00000013295
0.553292	1.28998	1.56451	0.530594	0.199342	-3.49392	-4	-3.38203	-3.83341	-1.85566	dpysl3_ENSDARG00000002587
0.724391	1.21967	1.17078	0.679245	0.740332	-4	-3.8175	-3.52645	-3.86934	-2.04698	etv1_ENSDARG00000101959
1.45347	0.354909	1.18416	0.549556	0.594683	-4	-3.92395	-2.92395	-2.98167	-1.46709	epb41l3a_ENSDARG00000002255
1.53435	0.207739	1.18582	0.524973	0.892906	-4	-4	-3.68582	-4	-1.82956	syt4_ENSDARG00000036505
1.91119	0.382518	1.18001	0.703279	-0.832121	-4	-4	-3.74037	-4	-1.90143	olfm1b_ENSDARG00000014053
1.07269	1.89101	0.013402	-0.190581	-2.2816	-1.83657	-3.36907	-0.754358	-2.15405	-0.148517	nrp2a_ENSDARG00000096546
1.4006	1.12748	0.844061	1.03186	-2.37599	-2.62597	-2.1075	-2.16299	-4	-0.940601	kif3cb_ENSDARG00000079500
1.69533	0.895269	1.2172	0.416615	-2.38484	-4	-4	-0.944267	-4	-0.914209	efnb3b_ENSDARG00000042277
-0.545188	2.32063	1.18988	-1.47119	-1.4008	-4	-2.62319	-2.33368	-3.79312	-0.301262	rabggtb_ENSDARG00000068587
0.954175	2.32791	0.470238	-1.15045	-0.791995	-1.66678	-4	-4	-4	-1.92489	syt14a_ENSDARG00000010934
1.34132	2.25068	0.341325	-1.26225	-1.154	-4	-4	-4	-4	-1.30022	gabbr1a_ENSDARG00000018967
-1.44361	-0.289801	0.969175	1.73032	1.25683	-3.59561	-4	-0.932645	-1.01065	-4	cpeb1a_ENSDARG00000045932
-2.4432	2.47475	-0.236748	0.650778	-0.895711	-4	-4	-1.09924	-0.786086	-2.33628	neflb_ENSDARG00000012426
-0.280552	1.25576	-1.33442	1.03684	1.5994	-1.61005	-4	-1.7287	-4	-0.770518	sncgb_ENSDARG00000098380
-1.19823	1.51165	-0.685891	1.96297	-0.522953	-0.670295	-4	-0.887525	-4	-1.83441	scg5_ENSDARG00000032126
-1.95964	0.826233	-1.73016	1.15392	2.28041	-3.11718	-4	-2.73016	-3.35819	-2.4957	GRM7_ENSDARG00000100267
1.30496	0.658314	-0.0759138	1.74699	-0.354069	-4	-4	-2.91437	-3.33758	-0.704256	celsr3_ENSDARG00000055825
0.804583	1.55418	-1.31089	1.96212	-0.895857	-4	-3.38128	-4	-4	-1.38128	Mar-07_ENSDARG00000096375
1.13035	0.113175	0.401896	0.481015	1.01487	-3.9486	-0.577042	-1.24816	-0.333891	-4	nalcn_ENSDARG00000001835
0.769533	1.29757	0.904693	0.437912	-0.888074	-4	0.070703	-1.45286	-1.08363	-3.03782	micu3b_ENSDARG00000074255
1.15567	1.01024	1.14906	-0.143386	-0.270391	-3.53166	0.245067	-3.37119	-1.57473	-3.29719	cyfip2_ENSDARG00000036375
1.86529	0.895663	0.217591	0.158698	-0.104337	-4	-1.20387	-1.31079	-2.20387	-2.31079	chd5_ENSDARG00000105083
1.7196	1.28511	0.633402	-0.165226	-0.783642	-2.33852	-1.68445	-1.5254	-2.2807	-2.44517	meis1b_ENSDARG00000012078
1.62005	1.41896	0.698432	-0.135736	-0.536274	-3.26259	-2.8109	-1.33883	-2.44316	-2.29477	cacna1ba_ENSDARG00000021735
0.792627	1.2568	1.03292	0.188309	0.623086	-3.6885	-0.951535	-2.26064	-2.74097	-2.32593	celf3a_ENSDARG00000034668
1.06163	1.70801	0.979892	-0.566403	-0.0775732	-2.86468	-1.51718	-2.58803	-2.38934	-2.27581	rtn1b_ENSDARG00000021143
1.58781	0.373908	1.49697	0.587805	-1.31342	-4	-2.2716	-0.991489	-1.94145	-4	pitpnab_ENSDARG00000044091
1.58393	0.431929	0.946502	1.11286	-0.416068	-4	-2.22342	-1.22342	-2.96039	-4	mpp3a_ENSDARG00000015184
0.510721	1.63448	1.35184	-1.69632	-0.356694	-2.78825	-0.504792	-1.07039	-1.09366	-4	ap1s2_ENSDARG00000058504
-0.330841	2.12304	1.49096	-1.89563	-0.176808	-4	-1.83673	-2.02116	-1.78015	-4	reep2_ENSDARG00000031382
0.666215	0.772176	1.28762	-0.392286	1.24357	-3.33143	-3.9871	-0.614679	-1.95292	-4	atp8a1_ENSDARG00000063001
0.629946	0.961489	-0.356958	-0.665909	1.92621	-3.08814	-4	-0.102641	-2.87402	-4	tbc1d9_ENSDARG00000059900
-1.02272	1.53916	-0.27208	1	1.36632	-4	-2.60768	-0.245112	-4	-2.83007	kcnq3_ENSDARG00000060085
-0.912733	0.470595	1.0794	-0.681408	2.16733	-3.85133	-2.04398	-1.68141	-4	-2.5294	nrg3b_ENSDARG00000089766
-0.00580562	-0.550611	0.617427	0.0399981	2.30444	-4	-1.34529	-1.31615	-4	-4	ppp2r2bb_ENSDARG00000099221
1.30517	0.207561	-0.169509	0.458523	1.39659	-2.73586	-2.11437	-0.0787431	-3.62894	-3.85133	rac3b_ENSDARG00000020795
0.82974	0.83775	0.0688165	-0.343954	1.78643	-4	-2.10452	-0.449651	-4	-3.18337	hand2_ENSDARG00000008305
1.50989	0.351448	0.98276	0.212374	0.588963	-3.81673	-0.952278	-1.10668	-2.78571	-4	numbl_ENSDARG00000101949
1.64013	1.30715	0.14425	0.632771	-0.289301	-3.50109	-2.00951	-1.04502	-4	-4	maptb_ENSDARG00000087616
1.73378	1.30273	0.736966	-0.147068	-0.860764	-3.63015	-3.63015	-0.50462	-3.76765	-2.76765	sgip1b_ENSDARG00000101215
1.39222	1.72369	1.07218	-0.294435	-1.06973	-2.72577	-4	-1.58034	-4	-2.86328	tln2b_ENSDARG00000104934
1.8785	0.664749	0.172724	0.433185	0.149392	-4	-3.91474	0.0436824	-4	-4	calb2a_ENSDARG00000041062
1.23913	0.437847	1.9503	-0.382829	-0.240225	-3.32769	-4	-0.627248	-4	-4	gabbr1b_ENSDARG00000016667
1.17406	1.44866	0.64089	1.06239	-0.773188	-3.32778	-4	-0.819983	-3.57289	-4	dock3_ENSDARG00000063180
1.25169	1.13861	1.03833	1.28333	-1.08956	-4	-4	-1.33647	-4	-4	erc1a_ENSDARG00000009941
1.64824	0.559218	0.254558	1.32922	0.0856549	-2.76602	-4	-2.1866	-2.27823	-4	hoxb2a_ENSDARG00000000175
0.849047	1.25421	0.176211	1.49395	0.51063	-4	-4	-2.09101	-2.26935	-4	soga3b_ENSDARG00000075455
1.15572	0.823514	0.914751	0.18538	1.18292	-2.35007	-4	-1.58828	-3.59088	-4	cacnb1_ENSDARG00000002167
0.69825	1.32922	0.589021	0.971268	0.827533	-3.14975	-4	-1.20489	-4	-3.66432	oprl1_ENSDARG00000071209
0.458685	1.50915	0.797709	0.961748	0.751662	-2.69226	-4	-2.73533	-4	-3.65044	stxbp1a_ENSDARG00000001994
1.32023	0.765502	1.23036	0.760507	0.372457	-4	-4	-1.88753	-3.53662	-4	ret_ENSDARG00000055305
1.90012	1.3129	0.448959	-0.00225245	0.310631	-4	-4	-2.83233	-4	-4	lrfn5a_ENSDARG00000071230
1.83333	0.204104	1.27849	-0.0272215	0.700755	-4	-4	-2.92073	-4	-4	stxbp5l_ENSDARG00000006383
1.03172	1.01457	0.553555	-0.338173	1.73347	-4	-4	-1.96487	-4	-4	snap25a_ENSDARG00000020609
1.21122	0.648221	1.57674	-0.902287	1.22882	-4	-4	-2.635	-3.40054	-4	adgrb2_ENSDARG00000025667
1.04781	0.319298	-1.38642	0.254689	1.7643	-2.87184	-0.255172	-1.87184	-2.69127	-1.69127	tulp4b_ENSDARG00000063056
0.91619	0.782053	-0.124837	1.12309	1.1143	-4	-0.967296	-2.21057	-2.82528	-2.30171	brinp2_ENSDARG00000014302
1.10957	0.905924	-0.362866	0.22387	1.55499	-3.19709	-0.744575	-2.69013	-2.15961	-4	kcnc4_ENSDARG00000061288
1.2815	1.32193	-0.058103	0.231853	1.10301	-4	-1.35311	-2.75607	-2.60407	-4	aplp1_ENSDARG00000098368
1.57923	-0.27684	-0.889817	-0.0885367	1.98127	-4	-2.19592	-3.27684	-1.88982	-2.93289	atp6v1e1b_ENSDARG00000030694
1.06038	1.16678	0.346968	0.140068	1.36727	-2.6472	-1.19201	-4	-4	-3.35347	dpysl5a_ENSDARG00000011141
1.58421	0.590221	0.123271	0.102393	1.44022	-2.23221	-1.67582	-4	-4	-4	sgsm1b_ENSDARG00000075376
1.15926	1.784	-0.657432	-0.0294009	1.06305	-2.30951	-1.65743	-4	-4	-3.5319	phyhiplb_ENSDARG00000070498
1.88033	0.758339	-0.869692	-0.329124	1.37132	-2.32912	-1.52177	-4	-4	-3.32912	crmp1_ENSDARG00000056742
1.5808	1.9042	-2.45139	-1.02141	0.944735	-2.49204	-1.03636	-4	-4	-4	nlgn1_ENSDARG00000077710
1.00525	1.00131	-0.245794	0.880905	0.862234	-4	0.457758	-4	-4	-3.81526	glrbb_ENSDARG00000052769
0.653349	1.30218	0.335867	1.63543	-0.853611	-3.6865	-0.438573	-4	-2.59904	-4	scn2b_ENSDARG00000101713
1.50268	1.01435	-1.32296	1.7462	-0.235495	-4	-1.37543	-4	-2.88239	-4	rab3c_ENSDARG00000014462
0.272512	0.58179	0.961456	0.804017	1.53602	-2.67135	-2.12734	-3.2785	-3.43798	-3.04656	cpe_ENSDARG00000055874
1.2168	1.23683	1.02684	0.333862	0.490405	-2.57096	-2.62779	-2.6736	-3.57717	-4	rims3_ENSDARG00000062305
1.03507	1.74116	0.45838	0.340631	0.43676	-2.72815	-1.76236	-2.92079	-4	-4	elavl4_ENSDARG00000045639
1.2888	0.960472	0.661733	-0.167977	1.27812	-2.98706	-2.44392	-1.9666	-2.79442	-4	ctnnd2a_ENSDARG00000062415
1.43585	0.582326	0.8517	-0.8056	1.54068	-3.27273	-2.63227	-2.96787	-3.23091	-4	mapk8ip3_ENSDARG00000062531
1.06187	0.66453	1.22186	1.32935	-0.0300572	-3.27798	-2.27798	-3.95606	-2.95606	-4	si:dkey-84j12.1_ENSDARG00000075126
1.15599	1.36423	0.880357	0.518561	0.413789	-4	-1.24419	-4	-3.13053	-4	dscamb_ENSDARG00000028118
1.42679	1.43963	1.1026	0.264421	-0.360069	-3.37799	-2.09259	-4	-3.43313	-4	mapk8ip2_ENSDARG00000063157
0.804097	1.19759	0.794439	0.314815	1.30804	-3.63938	-2.07788	-4	-4	-2.94972	phox2a_ENSDARG00000007406
1.26934	1.07651	0.791233	0.0595441	1.16486	-3.99513	-2.89343	-3.36234	-4	-2.96307	scn3b_ENSDARG00000062359
1.76529	1.42636	0.152472	0.135499	0.448865	-3.17792	-2.65067	-4	-4	-4	dctn1b_ENSDARG00000056753
1.53387	1.0691	-0.528842	0.485212	1.3821	-3.0837	-2.79536	-4	-4	-4	bsnb_ENSDARG00000079161
2.18959	-0.110457	0.994241	-1.56215	0.716707	-3.84226	-1.12605	-4	-4	-4	hspa4l_ENSDARG00000053544
2.22142	0.37707	0.979414	-0.359896	-0.338201	-3.40429	-2.08236	-4	-4	-3.81933	add2_ENSDARG00000074581
2.27367	-0.0680184	1.00474	-0.506461	0.424498	-4	-2.926	-4	-4	-4	taok3b_ENSDARG00000094052
1.60966	0.696078	1.0402	-0.243687	-0.222392	-3.56026	-4	-0.628649	-0.51425	-3.40826	efr3bb_ENSDARG00000069318
2.15992	-0.550353	0.384058	0.196198	0.0663179	-4	-3.72028	-2.39835	0.0130759	-4	grik5_ENSDARG00000101449
1.5383	-0.193681	1.22756	1.42407	-1.21036	-4	-4	-2.17719	-0.992768	-4	abhd8a_ENSDARG00000103518
1.48733	0.65175	1.43507	0.622002	-0.377998	-4	-4	-3.54792	-1.09946	-4	AP3B2_ENSDARG00000105296
1.78477	0.393342	1.34572	0.165475	0.0152991	-4	-4	-3.78598	-1.14552	-4	rusc1_ENSDARG00000078125
2.17608	1.08092	0.708951	-0.0565835	-1.37851	-4	-4	-4	-1.37851	-4	parp6b_ENSDARG00000070473
1.88885	0.910319	1.11433	0.2114	-0.0957814	-4	-4	-4	-2.6565	-4	cacna2d2b_ENSDARG00000078169
1.94358	0.448528	1.0788	0.943577	-0.847195	-4	-4	-4	-2.96749	-4	EML5_ENSDARG00000053517
1.85607	0.08092	0.861803	1.47698	-1.79355	-4	-2.74624	-2.24101	-4	-4	Mar-07_ENSDARG00000096271
2.15102	0.684935	0.962163	0.325854	-1.02778	-4	-3.19771	-3.19771	-4	-4	EML6_ENSDARG00000102755
2.1486	0.71739	0.966562	0.500898	-1.40599	-2.89142	-4	-4	-4	-4	slc6a15_ENSDARG00000062821
1.847	1.55719	-0.914117	-0.274013	-0.0311566	-3.85898	-2.93298	-1.64174	-1.50848	-1.99108	sgsm1a_ENSDARG00000028857
0.855104	1.54816	0.122857	0.733113	0.682074	-4	-2.64386	-2.14136	-1.08586	-4	slc7a14a_ENSDARG00000010816
1.38963	1.55098	0.720755	0.0160301	-0.198414	-4	-2.70246	-2.16189	-1.10011	-4	smpd3_ENSDARG00000098226
1.39621	1.40408	-0.74763	-0.162667	1.14052	-4	-3.24239	-1.57254	-0.920467	-4	fsd1_ENSDARG00000062017
1.37783	2.03607	-0.570583	0.417444	-0.775201	-4	-4	-1.40198	-2.06318	-3.48945	fbxl16_ENSDARG00000060915
1.21522	2.47446	-1.31404	-0.415917	-2.18851	-4	-4	-1.31404	-1.52554	-4	cygb2_ENSDARG00000070148
1.5815	1.88251	-0.254997	-0.430084	-0.414654	-4	-2.79932	-0.779418	-4	-2.11126	cdk5r1b_ENSDARG00000045087
2.16947	0.963023	-0.729922	-0.693022	0.786146	-4	-4	-1.78322	-4	-2.30001	map7d2a_ENSDARG00000068480
0.965327	2.54378	-1.65916	-0.659163	0.0412763	-4	-4	-2.43677	-4	-4	rab15_ENSDARG00000026484
1.05976	1.11922	0.890366	0.262031	0.933631	-2.64578	-2.76403	-2.62653	-2.65133	-2.71673	alcama_ENSDARG00000026531
1.17817	1.03835	0.66596	0.596752	0.834006	-3.84331	-2.58028	-2.06651	-2.60453	-2.62919	dlg2_ENSDARG00000099323
1.17315	1.23161	0.887984	0.243601	0.822787	-3.74328	-3.8377	-2.74328	-2.95754	-2.55105	nos1_ENSDARG00000068910
1.34581	0.859086	0.41686	0.41686	1.28103	-3.64152	-3.27895	-3.05084	-2.88409	-3.25248	syt1a_ENSDARG00000030614
0.715389	1.05611	1.02271	0.878995	0.727288	-4	-1.86659	-4	-2.33424	-2.35919	ptprt_ENSDARG00000074781
1.49985	1.21692	-0.0600306	0.302798	0.918839	-4	-3.20454	-3.87439	-1.37382	-2.84197	jakmip1_ENSDARG00000076090
1.21866	1.33566	0.583429	0.0288397	1.07687	-4	-4	-4	-3.97116	-1.3862	disp2_ENSDARG00000042846
0.211187	2.24283	-0.326874	0.507293	0.529598	-4	-4	-4	-3.4968	-1.82695	khdrbs2_ENSDARG00000069469
0.901055	1.98939	0.915752	-0.271334	0.0813379	-4	-4	-4	-3.97177	-2.0083	sult4a1_ENSDARG00000101967
0.67942	2.3106	-0.0555047	-0.134074	0.335112	-4	-3.87823	-4	-4	-2.6766	bin1a_ENSDARG00000042114
1.11533	1.15866	0.491133	0.821713	1.12585	-2.45563	-4	-4	-4	-4	stmn2b_ENSDARG00000070537
0.791413	1.10481	1.51259	0.245183	0.833327	-2.94883	-4	-4	-3.13524	-4	akap6_ENSDARG00000077295
0.790437	1.12853	1.42205	0.388883	0.926092	-3.27185	-4	-4	-4	-4	serpini1_ENSDARG00000034168
1.40805	1.28723	0.755113	-0.0902288	1.01022	-4	-4	-4	-2.58592	-4	sgsm2_ENSDARG00000063307
1.21703	1.20736	0.552803	0.490358	1.12314	-3.49378	-3.14328	-4	-3.33997	-4	scg2b_ENSDARG00000038574
1.19369	1.1949	0.645358	0.81785	0.99582	-4	-4	-4	-4	-4	ppp2r5b_ENSDARG00000054931
1.17134	1.10658	0.520727	0.897998	1.11995	-4	-4	-4	-4	-4	phox2bb_ENSDARG00000091029
1.43347	1.10887	0.290619	0.53389	1.2488	-4	-4	-4	-4	-4	plcxd3_ENSDARG00000054794
0.825053	0.948362	0.494777	0.354201	1.77653	-4	-4	-4	-3.8188	-4	fgf13b_ENSDARG00000056633
1.11153	1.42598	1.15797	0.666664	0.120823	-4	-4	-3.80471	-4	-3.68653	cadpsa_ENSDARG00000043661
1.38014	1.3012	0.989747	0.548755	0.507257	-4	-4	-4	-4	-4	celf4_ENSDARG00000070045
1.25537	1.26912	1.15125	0.490087	0.487951	-4	-4	-4	-4	-4	kif5aa_ENSDARG00000098936
0.981504	1.59163	0.68422	0.880759	0.51916	-4	-4	-4	-4	-4	slc29a4_ENSDARG00000059690
0.0908628	1.9585	1.08146	0.315929	0.656966	-4	-4	-4	-4	-4	zmat3_ENSDARG00000080021
0.479594	0.814778	1.40559	0.968539	1.06209	-4	-4	-3.32038	-4	-4	prph_ENSDARG00000028306
0.556423	0.394103	1.21955	1.29583	1.15656	-4	-4	-3.28488	-4	-4	stmn2a_ENSDARG00000033234
0.802494	-0.0170842	0.645643	1.70579	1.25983	-4	-4	-4	-4	-4	slc18a3a_ENSDARG00000006356
1.04658	1.53756	0.0689756	1.22642	0.604146	-4	-4	-4	-3.29533	-4	fxyd6_ENSDARG00000100971
1.34476	1.87562	0.136239	0.317623	0.256487	-4	-4	-4	-2.8987	-4	kcnc1a_ENSDARG00000051852
1.59666	1.73048	0.00215488	0.183993	0.459628	-3.43944	-4	-4	-4	-4	dnm1a_ENSDARG00000010042
0.888046	1.96199	-0.626203	0.997063	0.55589	-4	-4	-3.00084	-4	-4	vip_ENSDARG00000078247
0.339373	2.15069	0.044075	1.24811	-0.221515	-4	-4	-4	-4	-4	entpd3_ENSDARG00000035309
1.10525	0.371291	0.348571	-0.928269	2.17793	-4	-2.47671	-4	-4	-4	chrnb4_ENSDARG00000101677
0.119454	0.786261	1.11379	0.440751	1.77262	-4	-3.76928	-4	-3.83704	-4	vipb_ENSDARG00000079443
0.482199	0.587235	1.33811	-0.207945	1.8456	-4	-4	-3.5178	-4	-4	nrsn1_ENSDARG00000044719
0.380047	0.0638323	0.680752	-0.869313	2.3674	-4	-4	-3.21872	-4	-2.85307	oxr1b_ENSDARG00000063310
-0.0688447	1.32887	-0.872153	-0.436054	2.29934	-4	-4	-4	-1.73722	-4	tubb2_ENSDARG00000039522
0.536342	0.81655	-1.25076	-0.259588	2.39074	-4	-4	-3.60832	-2.38592	-4	kcnc1b_ENSDARG00000032959
1.84613	0.956836	-0.0508262	0.0175291	1.22213	-4	-4	-4	-4	-4	cadpsb_ENSDARG00000070567
1.39189	1.64336	-0.139152	-0.859578	1.35693	-4	-4	-3.86707	-4	-3.86707	map6a_ENSDARG00000074521
1.21613	1.47962	-1.49114	0.397828	1.60572	-3.74353	-4	-4	-4	-4	gria2a_ENSDARG00000070173
1.02693	2.10382	0.125292	-1.2298	0.913788	-4	-4	-4	-3.0711	-3.33414	fstl5_ENSDARG00000040198
0.395929	0.928424	0.149289	-1.00543	2.36599	-4	-4	-4	-4	-4	stmn4_ENSDARG00000030106
-0.435423	1.7541	-0.457791	-0.965938	2.17974	-4	-4	-4	-3.93423	-4	sncga_ENSDARG00000034423
1.27519	0.319588	1.70744	-0.377343	0.910782	-2.42364	-4	-3.53216	-4	-4	atp6v0a1b_ENSDARG00000015174
1.71751	-0.5158	1.03814	-0.485427	1.60909	-2.90046	-4	-4	-4	-4	kcnk2a_ENSDARG00000055123
1.90122	0.750656	1.02566	-2.01873	1.02168	-2.30824	-4	-4	-4	-4	ctxn1_ENSDARG00000098284
1.56559	0.635569	1.28254	0.107545	0.781686	-4	-3.8586	-4	-4	-3.13658	elavl3_ENSDARG00000014420
1.85728	0.21995	0.812891	-0.118068	1.21594	-4	-4	-4	-4	-3.30495	CEP170B_ENSDARG00000078327
1.68815	1.1086	1.10657	-0.276404	0.43497	-3.36916	-4	-4	-3.41496	-4	cacna1bb_ENSDARG00000079295
1.77767	1.00411	1.03779	0.107223	0.333583	-4	-3.38029	-4	-4	-4	chrna3_ENSDARG00000100991
1.89814	1.15563	0.765763	-0.0840885	0.23604	-3.87738	-4	-4	-4	-4	nfasca_ENSDARG00000061099
1.93815	1.24755	0.649104	0.0868223	0.0488211	-4	-4	-4	-4	-3.93586	unc80_ENSDARG00000098290
1.8669	1.09422	1.38307	-0.790578	-0.0691291	-4	-4	-4	-4	-4	chata_ENSDARG00000015854
2.40358	0.660988	0.1976	-0.641006	0.233655	-4	-4	-4	-4	-4	palm1a_ENSDARG00000026882
0.963601	1.26376	1.48135	-2.27798	1.25859	-4	-4	-4	-4	-2.40352	rundc3ab_ENSDARG00000002546
1.26493	1.04138	1.30149	-2.80986	1.53143	-4	-4	-4	-4	-4	mturn_ENSDARG00000074505
0.189478	1.73697	0.858272	1.34702	-1.39548	-1.926	-4	-2.28857	-2.28857	-3.09592	gpr27_ENSDARG00000006607
1.56195	1.53016	-0.0750394	0.978955	-2.31383	-1.31383	-3.63575	-2.56537	-1.70975	-3.63575	UBE2O_ENSDARG00000100674
1.11259	0.405286	-0.765535	1.96618	-1.66439	-1.23812	-4	-0.109799	-2.22698	-2.85703	ccdc92_ENSDARG00000041750
1.06341	1.84372	-1.18813	1.45847	-4	-1.85253	-3.33252	-1.41052	-2.02586	-3.41052	gdap1_ENSDARG00000058601
0.330845	0.419503	1.81409	1.42903	-3.64898	-1.8189	-1.86471	-2.73144	-2.29534	-2.29534	ankhb_ENSDARG00000014969
1.76325	0.421653	-0.320035	1.7854	-4	-4	-0.696183	-2.08085	-2.92884	-4	nat14_ENSDARG00000090962
1.88798	-2.59061	1.69262	0.861087	-4	-0.508147	-4	-2.43014	-2.59061	-4	vat1l_ENSDARG00000101280
1.71049	1.91908	0.0766213	0.0766213	-4	-2.78136	-4	-0.652077	-4	-4	nsfa_ENSDARG00000007654
2.21242	1.65859	0.112194	-0.684819	-4	-3.09986	-3.09986	-2.14877	-4	-4	ARHGAP22_ENSDARG00000076434
2.13593	1.09286	1.26902	-1.75889	-4	-4	-4	-0.530071	-3.75889	-4	cers4b_ENSDARG00000018619
2.12262	1.68966	0.992223	-2.04731	-4	-4	-4	-2.8953	-4	-4	nlgn1_ENSDARG00000087133
2.78415	-0.974005	-0.743225	-1.14577	-4	-4	-4	0.205701	-4	-1.78136	zgc:162952_ENSDARG00000056245
0.817623	1.18587	1.44846	-0.241555	0.392317	-3.44746	-0.199531	-4	-4	-4	micu3a_ENSDARG00000078599
0.908272	0.615254	1.99555	0.196343	-0.113997	-2.79849	-1.90541	-3.67985	-4	-4	syt17_ENSDARG00000060741
-0.417611	-0.626707	2.7504	-1.76553	-0.286367	-4	-0.406207	-4	-4	-4	ntrk3b_ENSDARG00000086214
1.15806	2.20713	0.415037	-1.54011	0.0931094	-4	-1.90689	-3.56986	-4	-4	ctnnd2b_ENSDARG00000003779
0.604771	2.29847	1.27462	-1.73918	-1.98019	-3.2697	-1.04731	-4	-4	-4	elovl7a_ENSDARG00000069279
1.63975	1.15332	1.61253	-0.487003	-0.718009	-4	-4	-2.74416	-4	-3.77979	shank1_ENSDARG00000060539
1.04676	1.54052	1.58416	-0.565758	0.208865	-4	-4	-3.23669	-4	-4	parvb_ENSDARG00000019117
0.733567	1.90953	1.0878	0.244051	-0.0754902	-3.08746	-3.67243	-4	-4	-4	slc4a8_ENSDARG00000015531
1.22144	1.99279	1.1835	-0.288423	-1.12269	-3.08952	-4	-4	-4	-4	CABZ01068356.1_ENSDARG00000076702
1.37582	2.03575	0.928362	-0.723715	-0.852998	-3.53107	-4	-4	-2.853	-4	sez6l_ENSDARG00000100594
0.965603	0.694034	2.50605	-1.93357	-1.44815	-4	-4	-3.48997	-4	-4	rundc3aa_ENSDARG00000007245
1.44863	0.772483	2.06222	-0.0858194	-3.45505	-1.74723	-4	-4	-4	-4	sncb_ENSDARG00000104945
2.09908	1.16502	1.41779	-1.95661	-2.31918	-1.90414	-4	-4	-4	-4	sez6a_ENSDARG00000100876
1.43639	1.21908	0.980009	1.37073	-4	-3.27633	-3.74582	-4	-2.49206	-4	si:dkey-84j12.1_ENSDARG00000094625
-0.165187	1.152	2.08398	1.12324	-2.00846	-2.774	-4	-4	-4	-4	nptnb_ENSDARG00000043864
0.636263	1.49194	1.73213	0.997771	-2.64795	-4	-4	-3.01718	-4	-4	cntn1a_ENSDARG00000087843
0.606058	1.90925	0.801609	1.43322	-2.34814	-4	-4	-4	-4	-4	sypa_ENSDARG00000042974
1.29458	2.08813	0.459352	0.380997	-1.76728	-3.78223	-4	-2.81261	-4	-4	clip3_ENSDARG00000054456
1.13586	2.33066	-0.386709	0.518654	-1.99475	-3.1416	-4	-3.09097	-4	-4	slc18a2_ENSDARG00000015110
1.76659	2.08146	-0.245186	0.0720038	-1.26903	-4	-4	-4	-4	-4	caly_ENSDARG00000036008
2.37594	1.02146	0.0117452	0.438916	-2.87578	-2.80539	-3.73828	-4	-4	-4	ppp2r2cb_ENSDARG00000062277
1.43784	2.01096	0.406269	0.74932	-4	-4	-4	-3.04468	-4	-4	cadm1a_ENSDARG00000031075
1.63263	1.62358	1.21759	0.520154	-4	-4	-4	-4	-4	-4	arf3a_ENSDARG00000070539
0.746126	2.63217	0.396541	-0.557655	-2.97269	-4	-4	-4	-4	-4	rab39ba_ENSDARG00000019312
1.72599	-2.58496	2.30433	-0.489805	-1.4199	-3.38143	-4	-1.67516	-3.45943	-4	tp53i11a_ENSDARG00000069430
-0.2159	-3.53783	2.87882	-0.155359	-1.53783	-4	-2.53783	-4	-4	-1.82162	cyb561_ENSDARG00000038176
0.778693	1.14731	2.43239	-4	-4	-4	-2.85452	-1.56234	-2.61125	-4	rab27b_ENSDARG00000087762
1.44652	1.83537	1.63743	-4	-4	-4	-4	-2.08746	-3.55695	-2.08746	atxn10_ENSDARG00000008439
1.30096	0.828473	2.36141	-3.03402	-4	-2.40599	-3.90849	-4	-2.6861	-3.49346	flot2b_ENSDARG00000069774
-2.09873	0.071191	3.03055	-4	-4	-4	-1.36177	-2.6837	-4	-4	gpib_ENSDARG00000103826
-2.85549	0.925868	2.90606	-1.60756	-4	-2.85549	-4	-4	-4	-4	oprk1_ENSDARG00000006894
-0.519374	1.92909	-4	0.321928	-4	1.9937	-4	-4	-2.29698	-4	asl_ENSDARG00000033361
-1.46815	2.23967	-4	2.12481	-4	-2.20511	-1.79008	-4	-4	-4	dgkb_ENSDARG00000027724
1.89184	1.83254	-1.46935	-0.867896	-0.137504	-0.519973	-2.8679	-4	-3.74237	-4	nmnat2_ENSDARG00000004580
1.17625	2.39542	-0.156993	-0.516321	-1.39079	-1.41776	-3.44524	-4	-4	-4	hmx3a_ENSDARG00000070955
2.21939	1.90928	-1.83753	-0.519558	-4	-1.28589	-2.70543	-4	-4	-4	si:dkey-31e10.5_ENSDARG00000067992
2.21205	1.6009	0.137504	-4	-2.09954	-0.0995357	-4	-4	-3.90689	-4	SLC5A7_ENSDARG00000098636
1.74487	2.61633	-4	-4	-1.11548	-4	-4	-4	-4	-4	samd10b_ENSDARG00000094377
1.35593	0.322728	-0.0104398	0.514173	1.25058	-0.766335	-0.759546	-3.44986	-4	-4	map1b_ENSDARG00000060434
0.649187	0.625698	0.297838	1.15369	1.47814	-1.64611	-1.64611	-4	-4	-4	eef1a1a_ENSDARG00000039502
1.4936	0.824296	0.147495	1.04214	0.292368	-0.698472	-1.75432	-3.1949	-4	-4	map6b_ENSDARG00000074073
1.39088	0.958913	0.879277	0.32918	0.633641	-1.14062	-1.93799	-4	-4	-4	cbarpb_ENSDARG00000071325
1.70703	0.00885998	-0.67039	1.71968	-0.241277	-0.757853	-1.73795	-4	-4	-4	atl1_ENSDARG00000060481
1.14296	0.430862	-0.297386	-0.0142139	1.71882	0.160465	-3.28011	-4	-4	-3.5025	stx1b_ENSDARG00000000503
1.00535	0.204662	-0.795338	-0.210375	2.18416	-0.994647	-2.22597	-3.74953	-4	-4	myt1la_ENSDARG00000008209
0.760944	-1.18207	-1.55045	0.569054	2.37899	-0.777224	-3.00988	-3.74685	-4	-4	si:dkey-153k10.9_ENSDARG00000004386
0.372056	1.37947	0.0482678	1.61449	0.189996	-1.64289	-4	-1.8703	-3.64289	-2.584	adcyap1r1a_ENSDARG00000105201
0.23816	1.15754	-0.427421	2.10692	-0.197939	-1.58496	-3.2854	-2.70044	-4	-3.70044	csdc2a_ENSDARG00000041323
-1.40259	0.882816	0.212124	2.06502	0.551611	-0.817623	-3.81762	-1.81762	-4	-4	svopa_ENSDARG00000056833
0.250996	0.625554	1.28759	1.61894	0.52539	-1.66591	-4	-4	-4	-4	necab2_ENSDARG00000056745
-0.274622	0.815575	0.436517	2.0658	0.407806	-1.22882	-4	-4	-4	-4	cnr1_ENSDARG00000009020
-0.249614	1.90479	-0.506251	1.50012	0.181365	-0.668218	-4	-4	-4	-4	ptprn2_ENSDARG00000035970
1.49679	0.534628	1.07107	0.137323	0.876582	-2.42487	-3.35863	-4	-1.98583	-3.39611	slit2_ENSDARG00000004246
1.34094	1.46202	0.406086	0.124244	0.75375	-2.35001	-3.90256	-3.72198	-2.35824	-3.70092	kif1ab_ENSDARG00000062024
1.76002	1.08069	0.894767	-0.214473	0.137697	-1.753	-4	-3.16586	-2.91155	-3.57512	cacna2d1a_ENSDARG00000014804
1.76776	1.02039	0.838553	0.106365	0.190317	-2.7681	-4	-2.88176	-3.64257	-2.8583	nrxn1b_ENSDARG00000063635
1.99128	0.595177	0.455902	0.883074	-0.327286	-2.50562	-3.29412	-3.29412	-3.05311	-4	jakmip2_ENSDARG00000053547
1.46494	1.05689	0.841241	0.380336	0.519313	-1.43719	-3.00793	-4	-4	-3.51043	kif21a_ENSDARG00000061131
1.69866	0.82382	0.76417	0.435401	0.411466	-2.04529	-2.95956	-3.95956	-3.23373	-4	amph_ENSDARG00000007663
1.76189	0.998235	0.267633	0.167792	0.853613	-2.59448	-2.87808	-3.57245	-4	-4	ank2b_ENSDARG00000043313
1.77509	0.655988	0.432024	0.432024	0.9143	-2.25562	-3.6014	-3.72693	-4	-4	mtus2a_ENSDARG00000062347
1.34507	0.933021	1.10956	-0.184942	0.853362	-0.62829	-4	-4	-4	-4	dner_ENSDARG00000061031
0.698233	1.65338	0.575376	0.838411	0.441075	-1.45705	-2.91648	-4	-4	-3.91648	MAPK8IP1_ENSDARG00000090326
1.16611	1.85924	0.697437	0.380964	-0.332007	-1.64652	-3.76199	-4	-4	-4	kcnq2b_ENSDARG00000091130
0.950245	0.36396	0.374833	0.374833	1.9022	-2.18185	-4	-3.32167	-3.15317	-4	adgrb3_ENSDARG00000059832
1.12353	0.615721	-0.355286	0.207881	1.98844	-1.65985	-4	-4	-4	-4	cart2_ENSDARG00000045832
2.10148	-0.75197	1.14615	-0.145312	0.214863	-1.51096	-3.62644	-1.75197	-3.88947	-4	parp6a_ENSDARG00000042703
1.2299	-0.831877	-0.694374	1.77101	1.36189	-2.69437	-4	-1.56884	-4	-4	inab_ENSDARG00000053248
1.99865	-1.09671	0.526219	1.18622	0.513673	-3.23807	-3.15561	-4	-3.74057	-3.51818	adam22_ENSDARG00000060532
1.67729	-0.835613	1.2943	0.814444	0.852825	-4	-3.39855	-4	-4	-3.27302	eno2_ENSDARG00000014287
1.57291	0.304283	-0.169233	0.728634	1.63664	-4	-4	-4	-4	-3.28817	fam117ba_ENSDARG00000074921
1.89483	-0.566398	-0.690134	-0.15631	1.9751	-4	-4	-4	-3.75622	-4	atcaya_ENSDARG00000071678
2.34581	-0.483517	-0.67159	1.12617	0.445292	-4	-4	-4	-4	-4	CABZ01041610.1_ENSDARG00000014169
-0.241554	1.36074	-0.11997	-2.37748	2.01078	-2.04176	-0.919769	-1.42878	-4	-2.04176	nme2b.2_ENSDARG00000099420
-0.582185	2.02799	-0.77483	-3.1127	1.89479	-3.9607	-1.63877	-2.07317	-4	-2.52774	kcnab2a_ENSDARG00000087247
0.595741	0.383172	0.996703	-0.349292	1.75508	-4	-2.21084	-3.35379	-2.49913	-0.91861	ptbp2b_ENSDARG00000015901
0.395132	0.450551	1.11055	0.281839	1.62242	-4	-1.67728	-3.69435	-4	-1.24118	gap43_ENSDARG00000099744
-1.0122	0.896507	1.69033	-1.18553	1.79516	-4	-2.49219	-4	-4	-1.61084	chga_ENSDARG00000008829
-0.442862	-1.35928	-0.121947	-2.24013	2.77246	-1.95382	-2.55329	-3.7397	-3.59768	-1.6204	hrasb_ENSDARG00000005651
-0.970184	0.477275	1.46924	-1.65703	1.78955	-0.522725	-2.37072	-2.20722	-1.65703	-2.92712	alcamb_ENSDARG00000058538
0.52063	0.473324	0.529067	-0.668996	1.85268	-0.315569	-4	-2.87063	-0.892998	-4	map7d2b_ENSDARG00000045316
1.05692	0.261387	1.29197	-1.67807	1.55206	-0.352197	-4	-2.96101	-3.8679	-4	stmn4l_ENSDARG00000043932
0.117446	0.773491	0.152003	-1.63417	2.24298	-0.172061	-3.92695	-4	-4	-4	sv2a_ENSDARG00000059945
-1.45273	-1.3438	1.08916	-1.95523	2.69662	-2.37027	-3.42472	-4	-4	-4	fnbp1a_ENSDARG00000036156
-2.00988	-0.537397	1.4626	-1.14199	2.51211	-4	-4	-4	-3.08389	-4	tagln3a_ENSDARG00000079805
-1.36588	-0.742949	-0.49141	-0.0381918	2.82157	-3.36588	-4	-3.83981	-4	-4	cplx2_ENSDARG00000061918
0.867752	0.420293	-2.90163	0.604718	2.18583	-4	-1.8375	-3.36107	-2.19114	-4	syn2a_ENSDARG00000045945
0.894162	-0.696194	-4	0.140956	2.61271	-4	-4	-4	-1.924	-4	kitlgb_ENSDARG00000058042
1.36248	0.103748	-3.38168	1.99683	0.71304	-0.88891	-4	-4	-4	-3.51096	RNF208_ENSDARG00000078056
1.43051	1.52812	-4	-1.51291	1.85274	-1.12588	-4	-4	-4	-4	plppr4a_ENSDARG00000079671
0.701181	0.00320956	-3.16672	-0.681289	2.67626	-3.02921	-3.02921	-4	-4	-4	eef1a2_ENSDARG00000006838
1.06206	-0.883304	-3.63333	-0.392317	2.65544	-2.13856	-4	-4	-4	-4	cdk5r1a_ENSDARG00000037916
-1.92853	0.468362	-4	-1.31186	2.75704	-1.66549	-0.28083	-4	-4	-4	glrba_ENSDARG00000052782
0.711374	-2.80735	0.805088	-0.259867	2.3991	-2.42033	-4	-4	-4	-3.04836	gdap1l1_ENSDARG00000028628
2.29862	-4	0.925269	-0.897385	1.36296	-4	-4	-4	-4	-4	tmeff2a_ENSDARG00000051824
0.869386	-3.96982	-1.99254	-0.992538	2.87646	-4	-4	-4	-4	-4	evlb_ENSDARG00000099720
1.56767	-1.03437	-0.227012	-4	2.49367	-4	-4	-4	-4	-4	tusc3_ENSDARG00000078854
3.08327	-4	-2.47897	-4	-0.309047	-0.894009	-4	-4	-4	-4	cnrip1b_ENSDARG00000037337
