# Supplementary material for: Enteric glia as a source of neural progenitors in adult zebrafish
Source: eLife. 2020 Aug 27;9:e56086. doi: 10.7554/eLife.56086 (PMC7521928; doi:10.7554/eLife.56086)
Supplement: Supplementary file 6. — Genes displayed in the heat map depicting the nRNASeq data of this study were selected as follows: genes with a logFC (Cherry+ vs Cherry-)>0, padj (Cherry+ vs Cherry-)<0.05 and an average TPM of 3. We removed from this list the genes found in Supplementary file 1. This selection highlights 660 genes. Gene names and Ensembl gene IDs found in column K. [file elife-56086-supp6.xlsx]

## Sheet: Suppl File 6 McCallum
Supplementary File 6
Table containing the order of heatmap genes and values for Figure 2-figure supplement1H
PE_SOX10_1	PE_SOX10_5	PE_SOX10_3	PE_SOX10_4	PE_SOX10_2	PE_neg_5	PE_neg_1	PE_neg_4	PE_neg_3	PE_neg_2	geneID
-0.644625	-4	-4	-1.88855	0.272912	0.492878	0.0923402	1.49652	0.0923402	0.550022	si:dkey-16p6.1_ENSDARG00000088836
-0.742202	-2.32716	-2.08616	-2.46467	-3.46467	1.09605	0.120294	1.41308	1.47079	-4	si:dkey-16p6.1_ENSDARG00000090033
-0.819328	1.23233	-2.31683	-0.194837	-1.59694	-0.521647	-0.731865	1.04692	0.953262	-1.40429	si:dkey-16p6.1_ENSDARG00000090192
1.4392	-0.467691	-1.62816	-0.411838	-1.62816	1.42904	-1.35807	-0.0431935	-0.17646	-2.13066	si:dkey-16p6.1_ENSDARG00000104850
0.476903	-1.10806	-1.69302	0.809478	-2.27798	1.40852	-1.81855	-1.10806	1.26117	-3.69302	si:dkey-16p6.1_ENSDARG00000105266
1.01149	0.712872	-2.32275	1.27928	-2.32275	-2.09448	-4	0.874394	0.454855	-4	znf1021_ENSDARG00000102804
0.341858	1.64252	-4	-2.1088	-4	1.8298	-3.69377	-1.01569	0.324156	-4	si:dkey-20i20.15_ENSDARG00000092073
1.24007	-0.684207	-3.82171	0.265753	-4	0.17829	-0.485427	1.89528	-4	-3.33628	si:dkey-16p6.1_ENSDARG00000101689
0.698822	0.116868	0.00439326	-1.5757	-3.07578	0.330215	0.0237586	0.811748	-1.09654	0.420649	si:dkey-16p6.1_ENSDARG00000088245
0.114816	0.783843	-0.0054781	-2.57484	-3.20711	-0.329368	-0.671059	-0.563256	0.0930118	1.46248	hdac8_ENSDARG00000105159
1.54392	-0.351888	0.846658	-0.839682	-2.69766	-0.743466	0.624265	-3.47527	-0.582185	-0.163684	si:dkey-16p6.1_ENSDARG00000100061
-1.15231	-0.761823	-0.0341148	0.4208	0.782047	0.130136	-0.463952	0.381093	-1.09874	0.418815	rpl37_ENSDARG00000034291
-0.0867753	-0.184386	1.10052	-1.01233	0.581149	-0.203751	-0.248298	-0.160539	-3.16528	0.406974	Mar-07_ENSDARG00000057772
-0.162613	1.00337	0.730835	-0.507748	0.438784	-0.0125001	-0.870747	-0.591093	-0.987189	-0.562773	appb_ENSDARG00000055543
-0.263786	1.65508	0.296929	-0.254797	0.234465	-0.752824	-1.01586	-1.17632	-1.41579	-0.202009	aldh5a1_ENSDARG00000076544
-0.513364	0.721867	1.15663	0.0997992	0.968605	-1.37659	-1.40622	-0.909717	-1.03602	-0.713628	fxyd1_ENSDARG00000099014
-0.166235	0.783139	1.26887	-0.821276	1.04903	-0.834392	-1.46963	-0.929699	-1.22547	-1.09348	slain2_ENSDARG00000032114
0.451211	0.834998	1.36267	-0.604823	0.619609	-0.83677	-1.64832	-1.40505	-1.67807	-0.959254	rab5b_ENSDARG00000016059
1.08562	0.875087	0.586131	-0.701165	0.326727	-0.536334	-1.2893	-0.708224	-2.50711	-0.346518	dock7_ENSDARG00000078675
0.456498	1.15463	0.731698	0.0492144	0.486178	-0.797899	-1.62224	-0.478358	-2.15198	-1.1119	ccser2a_ENSDARG00000087749
0.0451949	0.134809	1.18724	0.321332	0.780619	-0.405595	-1.46471	-0.782528	-1.53208	-0.782528	stau2_ENSDARG00000026801
0.408682	0.540965	0.384596	0.214671	1.08317	0.164631	-1.42033	-1.02237	-1.97174	-1.35399	atp6v1c1a_ENSDARG00000023967
1.14385	0.269382	1.08176	0.00634773	-0.221921	-0.289428	-1.29809	-0.904948	-1.81515	-0.827642	chd6_ENSDARG00000017244
1.13416	0.406781	0.93656	-0.041547	0.172128	-0.22183	-1.18777	-1.67512	-1.48585	-0.998734	fryb_ENSDARG00000056001
0.949801	0.636824	1.03503	0.0518616	0.26252	-0.373126	-1.42911	-1.75364	-2.30012	-0.773264	sorl1_ENSDARG00000013892
0.869968	0.508568	1.1179	-0.034875	0.421763	-0.502001	-2.34154	-1.26754	-1.41954	-0.808104	abhd3_ENSDARG00000018809
0.314616	0.561926	1.34364	0.755806	-0.342496	-0.519374	-1.72101	-0.899978	-2.37997	-0.899978	nat16_ENSDARG00000086222
-0.489102	-0.087004	1.37597	0.769632	1.02547	-0.974529	-0.711495	-1.59602	-2.29646	-1.4891	BX677667.2_ENSDARG00000102112
-0.0608127	0.287111	1.44271	0.605145	0.839298	-1.89944	-1.69358	-2.10861	-1.57574	-0.626113	zgc:162944_ENSDARG00000069846
-0.662821	1.04076	0.780905	0.824358	0.220792	-1.41074	-2.08789	0.0128622	-0.912284	-0.985432	aclya_ENSDARG00000099079
0.104809	0.81641	0.439168	0.738084	0.689772	-2.09978	-1.84744	0.374475	-1.38862	-1.56772	calm1a_ENSDARG00000021811
-0.983632	0.406713	0.797075	0.653699	1.52146	-1.27283	-2.43687	-0.170378	-2.46741	-1.64798	vdac1_ENSDARG00000045132
1.15087	-0.393738	1.25608	-0.341626	-0.646857	-1.40372	-0.711526	0.740747	-1.59637	-2.23975	arfgef1_ENSDARG00000063474
0.701494	-1.0107	-0.105861	-0.43601	-1.70731	0.162628	-1.47783	1.83559	-1.39537	-1.07344	si:dkey-16p6.1_ENSDARG00000098515
0.522596	-0.318484	0.086967	-1.724	1.60424	-0.469426	-0.367065	-0.262268	-0.139037	-3.09746	slc12a2_ENSDARG00000086870
-0.250456	-2.13498	0.573972	-0.409154	1.28352	-1.08053	-1.92853	-1.83542	1.52213	-1.4431	si:dkey-16p6.1_ENSDARG00000102212
1.80255	-2.66073	-0.178337	-3.28876	1.47098	-0.598446	-3.28876	-0.86555	-0.272459	-1.13348	znf987_ENSDARG00000101147
0.925763	-0.112232	0.619049	-0.604971	0.423262	0.486176	-0.124441	-1.52188	-2.003	-0.463844	dopey2_ENSDARG00000055857
1.42212	0.0837477	0.203601	-0.0719065	0.70458	0.280293	-0.914416	-2.46671	-2.70898	-1.15528	srsf5b_ENSDARG00000027734
0.970733	-0.336947	0.807853	0.160473	0.490251	-0.456742	-0.448438	-3.30849	-2.70363	0.332959	cpeb4_ENSDARG00000056691
-0.0801703	0.909822	0.396683	0.396683	-0.632268	-0.70217	-1.75426	-1.07354	-1.38229	1.08902	ptprub_ENSDARG00000101081
0.338983	0.960472	0.658443	0.976413	-0.191531	-0.976793	-0.381634	-1.20945	-1.57719	-1.62449	vwa8_ENSDARG00000078593
0.472858	0.903908	1.03183	1.16535	-0.779908	-1.57961	-0.976945	-2.16457	-1.57961	-1.08657	trib2_ENSDARG00000068179
0.626558	0.372892	0.189422	1.78126	-1.07712	-1.30015	-1.59662	-0.802647	-1.26485	-1.38287	zfr_ENSDARG00000027109
0.952852	0.441768	1.45218	-0.153687	-0.551279	-0.551279	-0.743924	-2.29752	-1.22935	-1.06189	heatr1_ENSDARG00000099742
1.02277	1.33707	1.07225	-0.112279	-0.871894	-1.26878	-1.11498	-1.96622	-1.56834	-1.33018	pdgfbb_ENSDARG00000038139
1.32137	0.930876	1.01399	0.341481	-1.85307	-1.08395	-0.654087	-2.51096	-1.91535	-1.04862	mtmr12_ENSDARG00000059817
0.5764	1.18659	0.679494	0.639867	-0.0610294	-0.985842	-1.07895	-4	-0.654925	-1.1032	stau1_ENSDARG00000044182
0.292181	1.34142	1.15568	0.836501	-0.707819	-0.877744	-1.87774	-3.87774	-2.07039	-1.01976	tle2_ENSDARG00000042484
0.590632	0.783339	0.77989	0.0286127	-0.0276802	-0.267933	-0.768427	-0.608494	-1.0307	-1.02316	sptbn1_ENSDARG00000102883
0.716595	0.379619	0.868044	0.717704	-0.451391	-0.657266	-0.479063	-0.805443	-1.22793	-0.988565	rarab_ENSDARG00000034893
1.00934	0.751877	0.241008	0.217029	0.18991	-0.538866	-0.29716	-1.05085	-1.3599	-1.17227	arhgap21a_ENSDARG00000104295
0.780572	0.617633	1.08276	-0.394967	0.311302	-0.96107	-1.09857	-0.712157	-1.28534	-0.673268	galnt1_ENSDARG00000061335
0.831444	0.832615	0.662471	-0.0231341	0.416601	-1.38374	-1.15514	-0.33161	-1.18329	-1.08707	hdac4_ENSDARG00000098349
0.801976	0.104986	0.903353	-0.22593	0.845532	-0.149115	-0.782987	-1.07618	-1.29519	-1.7665	ap1g2_ENSDARG00000054337
1.15017	0.279258	0.400192	0.335021	0.346937	-0.591662	-1.08687	-0.685638	-1.00237	-1.12398	sh3pxd2aa_ENSDARG00000060148
1.01641	0.631575	-0.150144	0.149745	0.792745	-0.468782	-1.06075	-0.717429	-1.40451	-1.00845	arglu1a_ENSDARG00000019223
1.23706	0.37523	0.285785	-0.0959244	0.578675	-0.291214	-0.984722	-0.492583	-1.59997	-1.58043	si:ch73-103b11.2_ENSDARG00000105209
1.55318	-0.105712	-0.0521072	-0.0390115	0.768343	-0.537534	-0.748715	-1.01317	-1.34796	-1.63269	prpf4ba_ENSDARG00000008784
1.24939	0.636663	0.314196	0.369742	0.286975	-1.10534	-1.30626	-0.249353	-1.43632	-2.10534	synm_ENSDARG00000062350
1.4479	0.805734	-0.436922	0.910491	-0.126466	-1.30072	-1.79135	-0.78225	-1.25593	-1.76422	plekha5_ENSDARG00000045870
1.63472	0.559427	-0.0952805	0.559427	-0.895411	-0.63743	-0.69773	-0.555437	-2.56343	-1.45537	si:ch211-126j24.1_ENSDARG00000098644
0.720067	0.942596	-0.237116	0.180767	0.77637	-1.1209	-1.05863	-0.585067	-0.537648	-1.18243	srsf3b_ENSDARG00000059360
0.431299	1.22886	-0.439461	-0.304316	1.01373	-0.768816	-1.3637	-0.191631	-0.945593	-1.43023	abcc5_ENSDARG00000061233
0.849741	-0.131833	-0.0867737	0.239053	1.31422	-0.773746	-2.05345	-0.195465	-1.04653	-1.01918	rab14_ENSDARG00000074246
0.878928	0.299725	0.037511	-0.207711	1.2496	-1.67827	-0.477766	-0.307997	-1.52207	-1.07829	TMEM269_ENSDARG00000079307
0.736966	0.0621402	0.585765	0.204745	1.1152	-0.775803	-1.2362	-1.38939	-0.419257	-1.5922	znf609a_ENSDARG00000103388
0.812018	-0.518627	0.632841	0.369163	1.16851	-0.311998	-1.95132	-0.836768	-0.891173	-1.77046	BX005228.1_ENSDARG00000105465
0.596207	0.705467	0.398004	0.168168	1.38596	-1.47418	-1.82782	-1.02505	-1.14975	-2.19039	tspan4a_ENSDARG00000089354
1.18575	0.422509	0.742876	-0.131593	0.616777	-1.54409	-1.3188	-1.17027	-1.36292	-0.539017	farp1_ENSDARG00000074381
1.5557	-0.261023	0.193217	0.382658	0.646744	-1.77434	-1.35618	-1.21995	-1.50922	-0.415953	kcnk4a_ENSDARG00000103286
1.07718	0.284028	0.431248	-0.440308	1.05383	-0.944142	-1.16249	-1.89631	-2.14935	0.0711754	plekha6_ENSDARG00000020328
1.22964	0.076468	-0.923532	0.289462	1.38711	-0.674619	-1.71459	-1.44885	-1.86839	-0.590406	rai1_ENSDARG00000076679
0.762981	0.741655	-0.355757	0.481593	1.17883	-1.50462	-1.01696	-1.07399	-1.78978	-0.789778	wnk4b_ENSDARG00000088967
0.323428	1.00748	-0.100965	0.0173971	1.32542	-0.788723	-1.24169	-1.11715	-2.19515	-0.721216	htt_ENSDARG00000052866
0.401862	1.10941	-0.0995357	0.68896	1.026	-1.23704	-1.23704	-0.974005	-2.66588	-1.23704	armc1_ENSDARG00000013861
0.742612	0.971431	0.297201	-0.23502	1.25041	-1.3505	-0.642678	-1.5025	-2.55695	-1.5025	nbr1b_ENSDARG00000078772
0.104277	0.378494	0.351289	0.204971	1.67029	-0.926467	-1.64871	-0.819551	-2.43787	-1.25954	ctbp2a_ENSDARG00000044062
0.980758	0.357712	0.525657	0.585818	0.769406	-1.26789	-0.873614	-1.99345	-3.77268	-0.295637	dmxl2_ENSDARG00000091293
0.175829	1.26498	-0.429393	0.44269	1.22388	-0.829931	-1.1375	-1.91307	-3.47379	-0.60589	si:dkey-222f8.3_ENSDARG00000058366
0.879614	0.110619	-0.714014	-0.164241	1.51272	-1.64611	-0.679662	-0.48914	-3.33417	-0.0446591	arhgap35_ENSDARG00000060297
1.48059	0.0442318	-0.276698	0.587296	1.17226	-1.7237	-1.39634	-1.18484	-4	-1.2618	rufy2_ENSDARG00000062019
1.84518	0.0641303	0.605678	-0.964667	0.660453	-1.28224	-1.11151	-1.68046	-1.96467	-1.71429	rabgap1l_ENSDARG00000061757
1.07585	-0.0186638	0.586198	-1.00371	1.6655	-1.08006	-1.69674	-1.14419	-2.3557	-1.72098	CABZ01114105.1_ENSDARG00000100540
0.964489	1.10477	0.753326	0.423331	0.389223	-1.25205	-1.52632	-1.89187	-2.31814	-1.62326	tshz3b_ENSDARG00000103361
1.24686	0.687275	0.473979	0.247865	0.842825	-0.924571	-2.33509	-2.1867	-2.76625	-0.849666	cdh2_ENSDARG00000018693
1.56031	0.861755	0.756335	-0.319194	-0.0429409	-1.75429	-2.21228	-1.6397	-2.41022	-0.413252	mical3a_ENSDARG00000021979
1.47642	0.803655	0.650409	-0.102038	0.354125	-1.45459	-2.89081	-1.82758	-2.14148	-0.547322	ece2b_ENSDARG00000102142
1.2202	1.12011	-0.489939	-0.289406	1.24703	-1.05604	-2.41594	-1.89656	-1.70812	-1.51547	large_ENSDARG00000005126
1.59263	1.32492	-0.744962	-0.118828	0.727106	-1.05087	-2.56671	-1.80714	-2.79969	-2.15167	map4l_ENSDARG00000068745
0.567592	1.20369	-1.02109	1.01753	0.593388	-0.00441529	-1.33188	-2.33188	-1.52453	-2.00995	ptprk_ENSDARG00000063416
0.103836	0.888107	-1.17856	0.639889	1.60916	-0.803055	-0.619833	-1.55513	-1.45728	-3.38802	camk1b_ENSDARG00000029474
0.335517	0.657445	-1.17906	0.990869	1.70009	-1.07952	-1.52698	-2.66448	-1.40145	-2.98641	si:dkey-19b23.15_ENSDARG00000075140
0.321587	1.16168	0.169281	0.90564	0.42421	-0.759752	-0.525864	-1.21774	-1.43092	-3.51608	NFATC2_ENSDARG00000100927
-0.336182	0.779295	-0.655554	1.5172	1.09602	-1.61775	-0.213639	-2.22781	-1.18111	-4	ptprz1b_ENSDARG00000020871
0.732339	1.73724	-0.576563	-0.355329	0.0999885	-3.07502	0.553183	-1.55245	-1.41567	-2.48244	prom1a_ENSDARG00000039966
1.62251	1.26974	-0.993862	1.08235	-1.8638	-0.901604	-1.09243	-2.32947	-1.72178	-3.19822	bmt2_ENSDARG00000062181
2.13574	0.788112	-0.463034	-0.36595	-1.5777	-1.34775	0.0125614	-1.94406	-1.69937	-3.78252	furinb_ENSDARG00000070971
2.55834	-0.795466	-1.89062	-0.615346	-0.449188	-0.992503	-0.16518	-3.49207	-2.5687	-2.1406	mical3a_ENSDARG00000097017
0.668827	0.675253	-1.4661	0.446435	1.2102	-3.33117	-2.09413	-0.8166	-1.52382	0.609665	fam217b_ENSDARG00000088505
1.7815	0.82223	-0.455755	-0.279432	0.134009	-4	-2.70729	-1.64018	-1.72457	0.392242	tns2b_ENSDARG00000068397
0.922588	1.19367	-1.22207	0.675775	1.16163	-3.63711	-1.76264	-2.36409	-0.993252	-1.05215	klf11a_ENSDARG00000030844
1.0106	1.0106	-2.02503	0.380964	1.55993	-2.02503	-3.76199	-1.88753	-1.88753	-0.703101	asmt2_ENSDARG00000070874
0.96839	0.371969	0.647603	1.59387	-0.554031	-4	-3.24793	-2.24793	-1.02251	-0.684339	psmb7_ENSDARG00000037962
1.44171	0.436411	1.32049	-0.258734	0.348948	-4	-4	-1.46123	-1.22479	-0.923131	PCDHGC3_ENSDARG00000102095
1.85358	-0.0208874	0.324887	0.901945	0.0380063	-4	-4	-0.90541	-2.60585	-1.02089	pcdh2g12_ENSDARG00000078940
1.47241	1.13424	-0.110597	0.820333	-2.66079	-3.29822	-2.24576	-4	-0.0815678	-0.182747	col14a1a_ENSDARG00000005762
0.907533	1.49762	-0.150078	-0.332076	1.15681	-2.97897	-2.13943	-3.90497	-0.583038	-1.80063	si:dkey-22o22.2_ENSDARG00000102445
0.0838072	1.56002	0.70172	-0.289002	1.09093	-3.40448	-2.5744	-4	-0.691761	-0.989442	col8a1b_ENSDARG00000003533
0.0264722	2.00998	-0.789103	0.38722	0.321928	-3.848	-3.43296	-4	0.166953	-0.909397	bach1a_ENSDARG00000062553
1.51862	0.535028	0.542003	0.596623	0.836771	-3.52931	-4	-3.93141	-2.13885	-0.862251	erc2_ENSDARG00000105178
0.631256	1.64833	0.812785	0.691451	0.17092	-4	-4	-4	-2.2408	-0.890048	CR855860.1_ENSDARG00000100012
1.34369	1.49396	1.17592	-0.358192	-0.670782	-3.37705	-3.45505	-4	-1.43515	-1.28513	KCNT1_ENSDARG00000104868
1.32477	2.20645	0.0085115	-0.909026	-1.07895	-3.34199	-4	-3.66391	-1.66391	-1.66391	psme4a_ENSDARG00000087911
1.05349	0.772887	-0.277486	0.354073	0.0868727	-0.398099	-1.87274	-0.593932	-3.84643	0.363496	plxnb1a_ENSDARG00000075821
1.35789	0.881587	0.653694	0.478939	-0.380131	-1.09446	-1.84881	-0.939004	-2.77772	-1.16528	h2afy2_ENSDARG00000087897
1.03403	1.24454	0.743438	0.428202	-0.766034	-1.09861	-2.15306	-0.707819	-3.22123	-0.826697	nckap5l_ENSDARG00000079148
0.885998	1.31981	-0.112653	1.15375	-0.251236	-1.33684	-1.88603	-0.991173	-2.92812	-1.45495	map7d1b_ENSDARG00000104701
1.07269	1.89101	0.013402	-0.190581	-2.2816	-0.754358	-2.15405	-1.83657	-3.36907	-0.148517	nrp2a_ENSDARG00000096546
0.982583	1.58111	0.493647	-0.251539	-0.1976	-0.365871	-1.75633	-1.18442	-3.79586	-1.60823	heatr5a_ENSDARG00000023999
0.887439	2.11327	-0.663496	-0.405515	-0.800999	-0.904504	-0.869171	-0.880853	-4	-2.17951	si:dkey-16p6.1_ENSDARG00000089179
0.654225	1.56112	-0.53842	0.951906	0.239188	-2.12338	-3.93074	-0.286881	-3.34577	-1.12338	abhd15a_ENSDARG00000078768
1.30153	1.51869	0.361152	-0.531933	0.500248	-2.33929	-4	-1.80586	-2.26529	-0.872969	dixdc1a_ENSDARG00000025302
1.62787	1.05455	0.557838	-0.404881	0.642187	-2.40488	-4	-1.73419	-2.04231	-1.73419	adgrb1a_ENSDARG00000075133
0.985944	2.07242	0.365232	-0.427973	0.0740006	-3.51096	-4	-1.51096	-4	-1.90091	jakmip3_ENSDARG00000100708
0.746309	1.33465	1.06009	-0.759582	0.317661	-2.04589	-1.40344	-1.59608	-4	-0.203766	klhl3_ENSDARG00000056647
1.28231	1.39189	1.04835	-0.394908	-0.218946	-2.31547	-2.50812	-1.47897	-4	-1.05137	pcdh10b_ENSDARG00000102824
1.92556	0.88374	-0.940689	0.466815	0.165511	-3.20372	-1.46676	-1.52565	-4	-0.960867	ADORA3_ENSDARG00000044061
0.602221	0.962492	1.52146	0.598081	0.393542	-2.93797	-2.67494	-1.59694	-4	-2.3213	SLC41A3_ENSDARG00000061272
1.33763	1.38674	0.90373	-0.0222692	0.380696	-2.60723	-4	-2.42666	-3.70677	-1.92916	fam49al_ENSDARG00000035907
0.982177	0.974149	1.16679	0.477406	0.865498	-2.60439	-3.16078	-3.18935	-4	-2.60439	chl1b_ENSDARG00000103109
0.248865	1.66741	0.487228	0.821282	0.255097	-1.14345	-2.69599	-4	-1.50485	-1.67215	ube2o_ENSDARG00000089054
0.515462	1.92192	-0.628274	0.685387	0.594119	-1.53516	-3.09459	-4	-1.78793	-2.17259	vcanb_ENSDARG00000009401
1.37716	1.3712	0.450215	0.490266	0.283864	-2.30484	-2.65972	-3.87638	-2.43651	-2.22613	pcdh9_ENSDARG00000063264
1.55404	1.09873	0.597035	-0.297031	0.736619	-1.97425	-3.53225	-4	-1.58323	-2.17861	CABZ01050166.1_ENSDARG00000101633
0.768344	2.24626	0.532335	-0.683892	-2.03116	-0.811382	-3.69109	-4	-1.78035	-1.87551	zbtb47b_ENSDARG00000079547
-1.43326	0.817225	2.3035	-0.236568	-0.0556834	-0.957708	-2.33914	-4	-2.72908	-1.96063	CU694219.1_ENSDARG00000104330
-0.245311	1.60591	1.69673	-1.24004	0.519913	-2.81451	-3.48009	-3.69421	-3.63763	-0.679856	si:dkey-71b5.3_ENSDARG00000095522
0.201431	1.24364	0.801344	1.30786	-0.97075	-0.669286	-0.677554	-2.50579	-3.53553	-2.0761	ldlrad4b_ENSDARG00000054941
0.575685	1.72819	0.0197674	0.530468	0.394843	-1.67325	-0.722164	-2.34748	-3.47581	-2.20163	ppp2r3a_ENSDARG00000077722
0.842656	1.0961	-0.0738202	1.67034	-0.465011	-2.22582	-1.22582	-2.81079	-3.39575	-1.58839	slc35e4_ENSDARG00000009459
1.1908	0.988898	0.686954	-0.133822	-0.608502	-1.09393	0.482263	-4	-4	-0.665835	aasdh_ENSDARG00000022730
1.00905	1.43531	0.963241	0.652901	-1.40599	-1.40599	-0.932061	-2.99095	-3.99095	-1.76856	elna_ENSDARG00000099634
1.04158	1.28845	1.39295	-0.00331273	-0.551438	-1.31697	-1.27633	-3.44626	-4	-1.92269	ablim2_ENSDARG00000055223
1.0961	1.61812	1.07432	0.555174	-2.29425	-1.97233	-1.77248	-4	-4	-1.37369	CU861453.1_ENSDARG00000089889
1.11427	0.793917	0.950643	1.10477	-0.0851581	-1.16719	-2.55186	-4	-3.39985	-1.49296	csnk2a2b_ENSDARG00000013582
1.44793	1.12363	0.812987	0.137589	0.0675203	-0.67244	-2.07133	-3.58873	-3.73759	-2.60294	CABZ01080009.1_ENSDARG00000091618
1.56135	1.31779	0.160247	0.754428	-0.609455	-1.12516	-1.42472	-4	-4	-2.51045	agfg1b_ENSDARG00000019526
0.920357	1.94931	0.354759	-0.431116	-0.289097	-0.3349	-2.11917	-4	-4	-1.38221	dnajc24_ENSDARG00000023927
1.847	1.55719	-0.914117	-0.274013	-0.0311566	-1.64174	-1.50848	-3.85898	-2.93298	-1.99108	sgsm1a_ENSDARG00000028857
2.08259	1.42989	0.327431	-0.5667	-0.937069	-2.48727	-2.08517	-4	-4	-2.83519	foxo1b_ENSDARG00000061549
1.8883	0.745339	-0.424586	0.316881	0.20477	-2.96515	-0.901024	-3.42459	-3.42459	-0.669699	mgrn1a_ENSDARG00000100072
1.84582	0.732436	0.0342628	0.385337	0.619225	-4	-1.41052	-3.58045	-2.58045	-1.99548	ccbe1_ENSDARG00000086158
1.09482	0.854167	1.52389	-0.308597	0.535394	-3.91689	-2.21164	-3.21164	-4	-0.916892	nup93_ENSDARG00000003487
1.35492	1.08045	1.38043	-0.852234	0.428373	-3.80219	-1.64691	-3.26162	-3.35473	-2.11188	ptprz1a_ENSDARG00000051814
0.384058	-0.034712	1.20572	0.218321	1.66975	-2.98331	-1.32339	-4	-4	-1.21778	plp1b_ENSDARG00000011929
1.13745	-0.701798	1.42496	-0.475206	1.5058	-2.65354	-1.14658	-4	-4	-1.85708	CABZ01059104.1_ENSDARG00000067927
1.33513	-0.176157	1.66558	-0.95109	0.962198	-3.85798	-1.68806	-4	-4	-0.873088	clns1a_ENSDARG00000103027
-0.627918	0.857509	1.6311	1.40536	-0.571335	-0.949846	-2.85674	-4	-4	-1.21288	phlda3_ENSDARG00000037804
-0.383229	1.95903	0.672331	1.25707	-1.74951	-1.79236	-3.5961	-4	-4	-0.616811	sulf2a_ENSDARG00000018423
0.159817	1.65167	-0.323608	1.67289	-1.58384	0.0122594	-3.84018	-3.68818	-4	-1.92265	nat9_ENSDARG00000071425
-1.41404	1.73496	-0.959469	2.17315	-1.70949	-1.46848	-1.33603	-4	-4	-2.77661	vhl_ENSDARG00000070617
0.656445	1.84422	0.12726	1.31341	-1.23408	-2.39846	-3.34955	-3.25644	-2.61259	-1.86413	CU861453.2_ENSDARG00000097192
0.148632	1.7686	0.578777	1.67153	-2.1733	-2.72078	-4	-4	-2.72078	-2.61387	ccdc32_ENSDARG00000073962
1.0846	1.60775	-0.944352	1.76506	-1.63024	-2.83188	-2.69437	-4	-4	-1.98388	tuft1b_ENSDARG00000071010
0.560088	2.49596	-1.08901	0.539026	-1.64155	-2.22651	-3.22651	-4	-4	-1.848	nr2f5_ENSDARG00000033172
1.01627	1.97177	-0.680802	1.41946	-1.43979	-2.14023	-4	-4	-4	-2.91784	CU462980.1_ENSDARG00000096879
0.804583	1.55418	-1.31089	1.96212	-0.895857	-4	-4	-4	-3.38128	-1.38128	Mar-07_ENSDARG00000096375
1.12959	0.441799	-2.13539	2.27017	-0.981058	-1.47487	-3.00212	-1.9603	-2.69727	-4	CT737162.1_ENSDARG00000096998
1.63683	1.32555	-1.689	1.42798	-0.359291	-2.99156	-4	-1.99156	-2.72853	-4	tenm4_ENSDARG00000105088
0.0438486	0.40028	1.12427	2.17759	-1.66581	-1.52285	-3.92884	-2.79134	-4	-4	commd7_ENSDARG00000036784
0.773491	1.42884	-1.00412	2.12399	-2.22651	-1.88547	-4	-2.32604	-4	-4	PCDHGC3_ENSDARG00000089562
1.33814	1.6745	-1.19148	1.37002	-1.05821	-0.75336	-3.56071	-4	-3.33832	-4	jkamp_ENSDARG00000028581
0.38584	2.69812	-1.14254	0.179389	-1.55758	-2.19912	-4	-4	-4	-4	CABZ01053588.1_ENSDARG00000074984
0.869744	1.68196	1.48097	-0.692676	-3.31159	-0.989658	-1.11894	-1.94902	-4	-2.53398	chsy3_ENSDARG00000069472
0.330845	0.419503	1.81409	1.42903	-3.64898	-2.73144	-2.29534	-1.8189	-1.86471	-2.29534	ankhb_ENSDARG00000014969
-0.277764	1.01508	1.47019	1.64112	-2.33717	-2.54264	-1.89056	-1.38916	-2.31186	-4	si:dkeyp-75h12.5_ENSDARG00000089877
0.155651	1.8255	1.13916	1.08854	-3.30378	-1.98185	-1.98185	-2.49643	-2.98185	-3.30378	sp100.1_ENSDARG00000055359
0.522227	1.3523	1.13657	1.55742	-3.35819	-3.4957	-1.29406	-4	-2.4957	-3.35819	ghrhrl_ENSDARG00000095788
1.47147	1.32353	0.559275	0.780631	-0.838945	-4	-2.52276	-0.791948	-3.61792	-3.32246	tom1_ENSDARG00000104581
1.07116	1.72651	1.19217	0.463473	-1.39279	-3.08085	-3.66581	-1.52285	-4	-4	pcdh2g8_ENSDARG00000100243
0.784677	1.74413	0.878872	1.24253	-1.70284	-4	-4	-1.26843	-4	-4	BX247868.1_ENSDARG00000095301
0.88164	2.35283	0.74161	-0.514288	-2.95486	-4	-3.3699	-2.76222	-3.76222	-2.40466	cep68_ENSDARG00000039411
1.16232	2.38435	0.098416	-0.68818	-1.20275	-3.42515	-4	-2.30967	-3.25522	-4	wnk2_ENSDARG00000104989
1.22144	1.99279	1.1835	-0.288423	-1.12269	-4	-4	-3.08952	-4	-4	CABZ01068356.1_ENSDARG00000076702
0.0832084	2.63881	-0.215133	0.382769	-1.38019	-4	-4	-2.61723	-4	-4	qpct_ENSDARG00000089717
0.388017	-0.548789	2.4818	0.299208	-1.28575	-0.977632	-2.09311	-4	-4	-4	pcdh2g3_ENSDARG00000103113
-0.366905	1.39883	2.14733	-0.320893	-1.08837	-0.350303	-3.79986	-4	-4	-4	slc6a4a_ENSDARG00000061165
1.9937	-0.451391	1.33336	0.792203	-1.44393	-1.97776	-3.08965	-4	-1.75845	-4	FP101911.1_ENSDARG00000097328
1.85607	0.08092	0.861803	1.47698	-1.79355	-2.24101	-4	-4	-2.74624	-4	Mar-07_ENSDARG00000096271
1.12705	0.880611	1.8229	0.866397	-4	-1.14796	-4	-4	-2.98446	-4	smyd3_ENSDARG00000058050
1.28141	0.562595	2.07566	0.36995	-2.21501	-2.21501	-4	-2.70044	-4	-4	CT027696.1_ENSDARG00000104743
0.636263	1.49194	1.73213	0.997771	-2.64795	-3.01718	-4	-4	-4	-4	cntn1a_ENSDARG00000087843
1.73378	1.30273	0.736966	-0.147068	-0.860764	-0.50462	-3.76765	-3.63015	-3.63015	-2.76765	sgip1b_ENSDARG00000101215
1.39222	1.72369	1.07218	-0.294435	-1.06973	-1.58034	-4	-2.72577	-4	-2.86328	tln2b_ENSDARG00000104934
1.97591	1.79502	0.204539	-0.916477	-1.33151	-1.10912	-4	-4	-4	-4	pcdh2ab2_ENSDARG00000037691
1.1905	1.37976	1.06194	0.598224	0.143891	-1.52988	-4	-4	-4	-4	CABZ01043956.1_ENSDARG00000087867
1.75714	1.02185	1.4074	-1.20333	0.172181	-1.95335	-4	-3.60543	-4	-4	nppc_ENSDARG00000068126
2.14953	1.62601	-0.298065	-0.129942	-1.43395	-2.91582	-3.01891	-3.21921	-4	-4	si:zfos-375h5.1_ENSDARG00000096920
2.59018	0.407175	0.120294	-0.131245	-1	-2.71621	-4	-4	-4	-4	zgc:123035_ENSDARG00000104264
1.5142	-0.102296	1.27437	1.10176	-4	-2.47286	-2.20982	-2.84725	-4	0.0489096	tubgcp2_ENSDARG00000013079
-0.155231	-1.12102	2.64717	0.486315	-2.87309	-4	-2.7287	-3.42058	-4	-0.95109	zgc:92873_ENSDARG00000102060
-0.0773825	1.61169	2.03923	0.0892673	-4	-3.69209	-4	-4	-3.23266	-0.991653	fam32a_ENSDARG00000042660
1.51544	1.36817	1.74564	-0.46641	-4	-4	-3.78834	-4	-4	-1.78834	map3k12_ENSDARG00000103651
-0.259545	-0.198145	2.16721	1.65984	-4	-4	-4	-2.56071	-1.19814	-4	trpc5a_ENSDARG00000070504
-0.77961	-2.14218	2.39919	1.94528	-4	-4	-4	-4	-4	-3.94953	CABZ01063757.1_ENSDARG00000098455
-2.94218	0.742319	2.16336	1.70168	-3.42761	-3.42761	-4	-4	-4	-1.84264	mrps18a_ENSDARG00000024465
-1.21945	0.855843	1.90394	2.00662	-4	-4	-4	-4	-4	-4	lrrc61_ENSDARG00000077357
1.53067	1.07779	0.682675	1.5476	-3.03317	-1.83007	-4	-4	-4	-4	samd12_ENSDARG00000069973
1.38559	1.50505	-0.645891	1.84407	-3.14839	-2.56343	-4	-4	-4	-4	podxl2_ENSDARG00000104419
1.66224	-0.0872168	0.974184	1.78154	-1.80342	-4	-3.02582	-3.87381	-4	-4	mdga2a_ENSDARG00000024017
1.12205	1.191	-0.0605415	2.11193	-1.95036	-4	-4	-4	-4	-4	AL954767.1_ENSDARG00000094503
1.5445	-0.306889	1.94945	1.11386	-3.11424	-4	-4	-4	-4	-4	slitrk1_ENSDARG00000104443
2.21773	0.808519	1.33545	-0.207078	-2.73064	-4	-4	-4	-4	-4	CR556696.1_ENSDARG00000096558
2.38859	0.878448	0.9004	-0.0947671	-4	-4	-4	-4	-4	-4	FAM19A5_ENSDARG00000068100
2.24469	1.30127	-1.07724	0.922757	-4	-4	-2.81421	-4	-2.07724	-4	zgc:110626_ENSDARG00000053159
0.721536	2.28304	-0.709099	1.3065	-4	-4	-4	-4	-1.77323	-4	efhc1_ENSDARG00000009743
1.42049	1.53806	-0.663572	1.78003	-4	-4	-2.50007	-2.72247	-4	-4	col28a1b_ENSDARG00000087087
1.29939	1.29939	0.770132	1.58683	-4	-3.10434	-4	-2.51937	-3.6893	-4	CR786577.1_ENSDARG00000097875
1.65439	0.564592	0.00586065	2.09562	-4	-4	-4	-4	-4	-4	gas7a_ENSDARG00000074443
0.387816	1.26696	-1.24961	2.48735	-4	-3.09761	-4	-3.83458	-3.83458	-4	c18h3orf33_ENSDARG00000040582
-0.133076	2.56528	-0.0238467	1.12816	-4	-4	-4	-4	-4	-4	CABZ01113883.1_ENSDARG00000100957
2.00918	1.98401	-2.25969	0.512899	-1.62226	-4	-4	-4	-4	-4	slc4a10b_ENSDARG00000060303
2.19128	1.06513	-2.72247	1.61654	-3.02732	-4	-4	-4	-4	-4	FO904869.1_ENSDARG00000099488
2.34933	0.202493	-4	1.70499	-4	-4	-4	-1.73039	-4	-3.60486	syt6b_ENSDARG00000031463
1.64332	1.8349	-4	1.48085	-4	-1.71316	-4	-4	-3.9502	-4	si:dkey-98f17.5_ENSDARG00000068863
1.25154	1.66658	-4	2.08881	-4	-3.97728	-4	-2.97728	-4	-4	six6b_ENSDARG00000031316
0.803541	2.43854	-4	1.43854	-4	-4	-4	-4	-4	-4	CABZ01102047.1_ENSDARG00000099648
1.7378	2.26151	0.0946192	-1.47353	-3.43546	-3.52857	-2.84052	-3.30618	-4	-4	BX649345.2_ENSDARG00000101124
2.1655	2.11631	-0.108863	-2.73335	-4	-3.73335	-4	-4	-4	-4	sox2_ENSDARG00000070913
1.22809	2.80007	-2.2236	-1.06314	-4	-4	-4	-4	-4	-4	si:dkey-191g9.5_ENSDARG00000056080
-0.60561	2.97284	-0.0077081	-1.49313	-4	-4	-4	-4	-2.81506	-4	mrps18c_ENSDARG00000069624
1.60204	2.46211	-0.76922	-2.70782	-4	-3.70782	-3.70782	-1.97085	-1.97085	-4	galnt18a_ENSDARG00000100889
0.384859	3.0103	-1.11471	-4	-4	-3.97269	-4	-3.38773	-4	-4	zgc:174275_ENSDARG00000099845
1.63584	2.51679	-4	-2.21501	-1.02237	-2.43741	-4	-2.43741	-3.43741	-4	htr2cl1_ENSDARG00000018228
0.820676	2.7993	-4	-1.26679	-0.459432	-2.94486	-4	-4	-4	-4	siva1_ENSDARG00000103598
2.32193	2.10253	-2.78361	-3.26903	-2.42104	-4	-2.26903	-4	-4	-4	mdh1b_ENSDARG00000018008
-0.0590398	3.09251	-4	-3.36282	-4	-3.36282	-2.90339	-4	-4	-4	si:dkey-103d23.3_ENSDARG00000095057
-0.548678	-2.05118	0.547081	1.96377	-4	1.17978	-0.266907	-4	-0.863552	-4	si:dkey-16p6.1_ENSDARG00000101828
0.257798	-4	-0.446746	1.33752	-4	2.21622	-0.446746	-2.61667	-4	-4	ADORA3_ENSDARG00000078129
1.32905	-1.15184	1.65777	0.914008	-0.904752	-1.07468	-1.01578	-2.23337	-3.26732	-2.48971	hars_ENSDARG00000003693
1.46362	-0.800556	1.86433	0.114832	-0.22782	-1.04905	-2.19745	-3.58077	-3.46048	-2.22169	pitpnm3_ENSDARG00000055255
2.5698	-1.44515	0.255287	-1.67256	-0.064331	-1.30219	-1.27523	-2.6378	-2.44515	-3.86019	ptpn4b_ENSDARG00000000183
2.05235	-1.65862	1.71061	0.0365259	-1.05094	-1.52738	-1.29605	-4	-4	-4	clybl_ENSDARG00000029729
2.43824	-1.52233	0.833149	0.0244117	-0.702904	-0.965938	-3.02483	-3.87283	-3.10729	-4	pfdn5_ENSDARG00000035043
0.72316	-2.88982	1.8397	0.270648	1.22239	-1.97728	-0.787455	-4	-3.80735	-2.51785	brat1_ENSDARG00000062585
1.94435	-4	1.55127	0.469743	0.469743	-2.49709	-1.86906	-4	-4	-4	CABZ01084225.1_ENSDARG00000098719
0.805353	-1.90514	2.44921	0.701517	-4	-1.77961	-4	-1.77961	-4	-2.19465	trappc4_ENSDARG00000027418
1.37985	-1.46815	1.20992	2.03435	-4	-2.37504	-4	-1.37504	-4	-4	mvk_ENSDARG00000004130
2.48524	-0.543331	-0.248588	1.34679	-4	-1.91417	-4	-4	-4	-3.96479	CU467888.1_ENSDARG00000104233
2.62697	-2.17393	0.803353	0.732964	-4	-2.36657	-4	-4	-4	-4	CABZ01071903.1_ENSDARG00000069904
0.284668	-1.49774	-0.618034	2.82707	-4	-1.25895	-4	-3.81967	-4	-3.68216	ttc26_ENSDARG00000012039
2.38512	-4	1.63561	-0.137504	-1.81128	-2.61863	-2.88166	-4	-4	-2.50315	tmem161a_ENSDARG00000012790
2.78007	-4	1.06926	-0.316027	-4	-3.12338	-4	-3.60881	-4	-4	id4_ENSDARG00000045131
2.81531	-3.33628	-0.841519	1.0991	-4	-3.47379	-4	-3.79572	-4	-4	nme4_ENSDARG00000088390
-1.25298	-4	-4	0.843881	-4	-4	-2.83794	-2.83794	-4	2.90801	ADORA3_ENSDARG00000026246
1.18186	-3.87925	2.77896	-1.5353	-3.6728	-4	-4	-1.55733	-4	-4	TMEM216_ENSDARG00000091576
0.511791	-4	2.84923	-0.1127	-3.1127	-4	-4	-4	-3.1127	-3.23823	hsd17b7_ENSDARG00000088140
0.329678	-3.79961	2.90083	0.244789	-4	-4	-4	-4	-4	-4	pigw_ENSDARG00000079244
0.0843644	-4	3.16024	-4	-4	-4	-4	-4	-4	-4	si:dkey-50i6.6_ENSDARG00000099009
3.23078	-4	-4	-4	-4	-4	-4	-1.19325	-2.51517	-4	pcdh2ab3_ENSDARG00000102719
1.07266	-0.0479987	0.0383804	0.217591	0.721143	-2.60259	-2.15633	-0.295159	0.184009	-0.412763	znf532_ENSDARG00000052894
0.4383	1.57555	0.768511	-1.22052	-0.160575	-1.97213	-1.0246	-0.893353	-0.85213	-0.324745	bach2b_ENSDARG00000004074
1.25074	1.17289	0.469114	-0.415037	-0.169925	-2.12553	-0.903138	-0.934709	-0.379848	-1.80069	FBXW7_ENSDARG00000060994
1.00015	1.00707	0.252966	0.0590272	0.346426	-0.985028	-1.04524	-1.67925	-0.853916	-0.666968	leng8_ENSDARG00000076805
0.853666	0.729157	0.557273	0.480889	0.607767	-1.31439	-1.55183	-1.63001	-0.951504	-0.834181	ctnnb1_ENSDARG00000014571
0.323647	0.772631	0.738684	0.442291	0.844618	-1.69016	-0.680941	-2.452	-0.785737	-0.942138	zeb1b_ENSDARG00000013207
1.28983	0.43733	0.625573	0.0972547	0.739649	-1.86223	-1.49228	-2.73079	-0.314742	-1.58447	pank2_ENSDARG00000003311
0.197102	0.662483	-1.11767	0.229523	1.66841	-2.28505	-1.86145	0.608035	-1.64028	-2.90478	si:dkey-151g10.3_ENSDARG00000021611
0.145533	1.28876	-1.48207	-1.50388	1.97079	-2.28044	-2.48207	-0.32503	-2.35775	-1.17756	mta3_ENSDARG00000054903
1.0155	0.0941619	0.95259	-0.406181	1.03649	-1.09026	-1.50619	-1.00201	-0.592652	-2.42969	CABZ01052431.1_ENSDARG00000100082
0.891228	0.308296	1.47574	-0.912744	0.517585	-1.47192	-1.58798	-0.697804	-0.572952	-2.46497	plekha7b_ENSDARG00000062220
0.373734	-0.175953	0.585888	-0.841534	1.89543	-0.858212	-1.82505	-1.61205	-0.760915	-1.79262	fasn_ENSDARG00000087657
0.304593	-0.0821858	0.9607	-1.79721	1.89588	-1.5139	-1.74377	-1.19421	-0.776936	-2.3552	si:dkey-286j15.1_ENSDARG00000040864
0.31208	0.150162	1.76431	-0.738193	0.565199	-1.27783	-3.41831	-0.63934	-0.393928	-1.92355	mmp9_ENSDARG00000042816
1.10193	0.398797	0.0923402	-0.456998	1.35738	-0.408558	-3.61292	-1.13648	-1.46405	-0.927025	fto_ENSDARG00000044216
0.438647	1.12454	1.10491	-0.713356	0.802611	-0.548862	-3.23692	-2.23692	-0.734417	-1.48798	slc12a2_ENSDARG00000104573
1.33301	-0.544733	1.29825	-1.40723	1.34279	-1.13874	-4	-1.2817	-2.2817	-1.50911	hdac8_ENSDARG00000003021
1.62739	0.638597	0.501651	-0.674426	0.610407	-1.82643	-2.21298	-0.677203	-1.81415	-1.40677	MARK4_ENSDARG00000024966
0.781953	1.38895	0.339571	-0.163155	0.691239	-2.07486	-2.98598	-0.313023	-1.4285	-1.52079	picalmb_ENSDARG00000014137
1.4217	0.255048	-0.34174	-1.35966	1.64259	-1.32404	-2.9267	-0.531843	-1.22216	-2.51166	zc2hc1a_ENSDARG00000027915
1.33448	0.506991	-0.294463	-2.45412	1.6926	-2.394	-2.11389	-1.30827	-1.31522	-0.737246	smarcb1b_ENSDARG00000011594
1.50255	1.46636	-0.397044	-1.53697	0.668141	-2.7683	-2.38497	-2.33767	-0.446371	-1.18334	spega_ENSDARG00000039256
-0.368178	1.66853	0.746155	-1.18673	1.04314	-0.508659	-2.44453	-1.1352	-1.9237	-1.9237	polr1c_ENSDARG00000039400
0.19307	2.0628	0.457343	-2.15892	0.354708	-1.31938	-1.82188	-2.36245	-1.14006	-1.08491	ercc2_ENSDARG00000021985
1.52933	1.2508	0.364217	-1.2817	0.645656	-1.78527	-2.67966	-1.91913	-0.762624	-2.54989	tuba8l3_ENSDARG00000070155
0.946725	1.80174	0.137107	-0.712476	0.493499	-1.26216	-3.56333	-2.32629	-0.550508	-3.56333	si:dkey-206p8.1_ENSDARG00000096971
-0.241554	1.36074	-0.11997	-2.37748	2.01078	-1.42878	-4	-2.04176	-0.919769	-2.04176	nme2b.2_ENSDARG00000099420
1.04495	2.06254	-0.154034	-0.154034	-1.13386	-1.65992	-3.49643	-0.780219	-1.60334	-2.39689	si:dkey-16p6.1_ENSDARG00000099262
-0.517339	2.19982	-0.313806	0.919393	-0.771657	-1.62313	-3.56173	-0.861294	-1.75438	-2.56173	asic1a_ENSDARG00000008329
0.504825	2.11083	0.219117	0.248621	-2.69975	-1.29036	-1.49029	-1.76901	-0.804928	-2.99931	phc2a_ENSDARG00000056695
0.224153	2.16122	0.47541	0.616135	-2.54844	-2.1334	-2.06301	-2.75489	-1.62244	-1.62244	clint1b_ENSDARG00000089914
0.75637	1.2325	1.38826	0.0746329	-0.970095	-3.19616	-1.94824	-0.476041	-1.13933	-2.06688	si:ch211-117a13.2_ENSDARG00000105449
0.573479	0.86191	1.6844	0.460791	-0.670758	-2.87613	-2.51596	-1.00558	-0.73765	-3.89783	klhl4_ENSDARG00000016531
2.00802	0.215886	0.587485	0.798129	-1.66676	-2.92979	-3.66676	-0.759866	-1.79229	-2.55128	tmem132e_ENSDARG00000090830
1.10445	0.770732	0.869661	0.533856	0.422395	-2.73025	-3.28968	-2.42908	-0.188879	-2.23383	zgc:123181_ENSDARG00000103602
0.914758	1.23596	0.644739	0.389505	0.699455	-2.42652	-2.58734	-1.88481	-1.03681	-2.72281	ebf1a_ENSDARG00000099849
1.24738	1.45291	0.422665	0.0530916	0.321382	-2.06766	-3.29005	-1.55309	-1.26358	-2.61868	fn1a_ENSDARG00000019815
0.969016	1.56414	0.323016	0.119351	0.706538	-2.43586	-3.08095	-1.77756	-1.1598	-3.75289	kif26ba_ENSDARG00000013343
0.915153	2.08426	0.315469	-0.0534566	-0.605361	-4	-3.24747	-1.93431	-1.04393	-3.29186	pcdh2g28_ENSDARG00000102943
1.07179	0.811555	1.05772	1.00734	0.0146468	-3.44478	-3.61471	-1.09115	-1.40526	-4	FP102783.1_ENSDARG00000105109
0.634451	0.894686	0.894686	1.60907	-0.506412	-2.62189	-4	-1.79181	-1.26825	-4	si:ch211-150g13.3_ENSDARG00000027394
-0.422233	1.04244	1.7668	0.255839	0.103836	-2.48113	-3.06609	-1.74416	-2.06609	-0.542527	mblac1_ENSDARG00000077314
0.0370781	2.10027	1.34603	-1.02901	-1.63669	-2.02901	-4	-1.94155	-1.78108	-0.941548	unc5b_ENSDARG00000033327
-0.610895	1.01245	2.19646	-0.367441	-1.46954	-1.74416	-2.45043	-2.61089	-0.45043	-2.11339	sort1b_ENSDARG00000056252
-1.66676	2.08813	1.50888	-0.365587	-0.641221	-2.08179	-2.56722	-1.42972	-1.56722	-4	idua_ENSDARG00000062904
0.599497	0.928378	0.540216	0.745214	0.635065	-0.494077	-1.3391	-2.33022	-1.01362	-3.3391	itgb4_ENSDARG00000028507
0.940447	0.779831	0.759531	-0.294018	0.906561	-0.552211	-1.10137	-2.63425	-0.729404	-3.86691	si:ch211-1e14.1_ENSDARG00000063361
0.599943	1.17783	1.19311	-0.181196	0.364855	-1.79989	-1.52143	-2.00992	-0.379046	-3.14528	spag9a_ENSDARG00000074531
0.149038	1.33666	1.26451	-0.518387	0.820415	-1.14642	-2.14642	-2.60585	-0.850962	-3.28392	si:dkey-16p6.1_ENSDARG00000093803
0.845698	0.610712	0.931598	-0.537246	1.27833	-0.963872	-1.54883	-3.0436	-1.35328	-1.80259	b4galt3_ENSDARG00000062329
0.678785	-0.116745	1.62434	0.111524	0.792891	-0.587816	-1.43867	-3.24603	-1.81976	-2.66107	tbc1d31_ENSDARG00000074623
1.23921	1.36827	0.282875	0.837547	-1.11532	-1.13608	-1.41171	-1.67475	-1.69001	-2.85228	pik3r3b_ENSDARG00000034409
1.7196	1.28511	0.633402	-0.165226	-0.783642	-1.5254	-2.2807	-2.33852	-1.68445	-2.44517	meis1b_ENSDARG00000012078
1.42561	1.40249	0.0623132	-0.0186068	0.0224205	-0.267835	-2.19548	-2.19548	-1.8364	-3.71905	pcdh1g33_ENSDARG00000099035
1.13879	1.12649	1.15099	-0.15583	-0.502388	-0.621852	-1.26506	-3.93344	-0.821929	-3.41886	pcdh1g13_ENSDARG00000098963
1.17988	1.22731	0.726001	0.647716	-0.869157	-0.493009	-2.03143	-3.17582	-1.10182	-3.42375	GSE1_ENSDARG00000062199
1.229	1.21732	1.14517	0.424551	-0.771	-0.867215	-2.02476	-4	-1.63773	-4	anos1a_ENSDARG00000012896
1.29147	0.354074	0.265888	0.190205	-0.756403	-0.443488	-1.00059	-1.89791	0.756922	-2.78158	rapgef2_ENSDARG00000005482
0.524258	1.34911	0.646141	0.500212	-0.335712	-0.0969251	-1.45601	-2.22468	-0.979568	-2.17221	smg7_ENSDARG00000060767
1.1662	1.05692	0.817721	0.489358	-1.3578	-0.982394	-1.22305	-1.94024	-0.610779	-1.89562	tns2a_ENSDARG00000076292
0.468769	0.544321	0.929611	1.187	-0.315502	-0.900464	-2.48543	-1.07039	-0.485427	-1.90046	vps18_ENSDARG00000070433
0.728641	0.340075	0.5474	1.64086	-0.312001	-0.686397	-3.44128	-1.5833	-0.949431	-2.98185	kiaa1549la_ENSDARG00000062477
0.726709	-0.263443	1.82113	0.519878	-1.39703	-0.863203	-2.00368	-0.491572	-0.735195	-4	phf21aa_ENSDARG00000006878
0.356456	0.53932	0.928362	0.40753	0.721911	-0.134179	-0.978528	-1.7941	-1.3505	-1.7941	FMC1_ENSDARG00000074266
0.860872	0.858317	1.06749	0.257924	0.132393	-0.553314	-1.58079	-1.88892	-1.31545	-1.75767	znf516_ENSDARG00000070809
1.19785	0.349848	0.98315	-0.133016	0.768488	-0.886504	-1.16472	-1.91704	-1.46393	-2.15105	myh10_ENSDARG00000000103
0.71553	1.33484	0.47818	-0.619095	0.713158	-0.22564	-1.53398	-1.1882	-1.39784	-2.90949	srsf1b_ENSDARG00000017843
0.650136	1.33022	0.946956	-0.373097	0.48165	-0.745066	-1.60646	-2.07003	-1.05492	-2.5106	arhgap23a_ENSDARG00000052950
0.325764	0.445445	0.953152	0.323573	1.06885	-0.155727	-1.98309	-1.50699	-1.40175	-2.19288	agap1_ENSDARG00000062123
0.622432	0.610119	1.08964	-0.00820253	0.827792	-0.175757	-1.75363	-1.11317	-1.8869	-3.03374	pspc1_ENSDARG00000006621
0.232901	0.593196	0.0428848	0.638701	1.42068	-0.146429	-1.79395	-1.18418	-1.95245	-2.62867	usp5_ENSDARG00000014517
0.245996	0.714041	1.17517	0.435181	0.28183	0.412269	-1.75228	-1.47664	-2.44841	-2.49385	flot2a_ENSDARG00000004830
0.629898	-0.428996	0.69876	0.393545	0.838484	1.02557	-2.429	-2.09642	-1.13949	-3.72445	kcnn1a_ENSDARG00000091306
-0.593487	0.379546	0.849334	2.07453	-1.31275	-0.888942	-1.01209	-1.3849	-2.42237	-4	efcab7_ENSDARG00000020279
-0.0563004	1.46854	-1.62662	0.921447	0.0154903	0.0838773	-3.21158	-3.50109	0.788421	-4	rmdn3_ENSDARG00000041407
0.662027	0.272205	1.00917	0.871382	0.944911	-1.15079	-2.27053	-1.35626	-1.92657	-2.92657	ano10b_ENSDARG00000018159
1.33287	0.191397	0.994999	0.552995	0.813759	-2.36757	-2.42004	-1.17493	-2.17493	-3.71549	si:dkey-30e9.7_ENSDARG00000101697
0.966996	1.2673	0.662842	0.0705003	0.387982	-1.09389	-3.14451	-0.781943	-1.19698	-3.36691	si:ch73-71d17.2_ENSDARG00000036575
1.07129	1.651	0.246438	0.312468	-0.169925	-1.08746	-2.79796	-1.73383	-0.990601	-4	CABZ01085140.1_ENSDARG00000098070
1.15959	1.15959	1.0963	0.571529	-0.949708	-1.45667	-3.00416	-0.871705	-1.94971	-3.38267	sorcs2_ENSDARG00000077465
0.830858	0.742652	1.80919	0.260237	-0.38226	-1.03509	-4	-2.93367	-1.45626	-4	phldb1b_ENSDARG00000079378
0.843703	1.57789	1.10327	-0.348942	0.544143	-1.99876	-3.85674	-2.27177	-2.33317	-3.27177	mcama_ENSDARG00000089643
1.30012	1.7866	0.867896	-0.391191	-0.540568	-1.79837	-4	-2	-2.51457	-3.51457	CABZ01112344.2_ENSDARG00000103349
0.633614	1.74333	0.165279	-0.483109	0.977795	-1.2446	-3.78892	-1.01633	-2.20396	-3.49941	nt5dc2_ENSDARG00000059646
1.3489	1.10858	-0.569491	-0.721494	1.61954	-1.30646	-3.89142	-1.51291	-3.40599	-4	BX005417.3_ENSDARG00000102480
0.025347	2.13458	-0.260562	0.407595	0.759067	-1.02412	-3.74995	-2.64303	-4	-4	strada_ENSDARG00000037929
1.67948	1.30682	0.824428	-0.562595	-0.356144	-0.803603	-3.67807	-1.56259	-4	-4	si:ch73-119p20.1_ENSDARG00000099257
1.14518	1.616	1.07947	-0.739138	-0.242462	-1.97477	-3.92896	-0.321632	-4	-4	kif3ca_ENSDARG00000017162
0.843797	0.684105	1.48357	-0.900858	0.565565	-2.31957	-3.61235	-0.233841	-2.57673	-1.03946	prkacab_ENSDARG00000016809
0.567942	0.475207	1.25813	-1.26776	1.34258	-1.08013	-3.04537	-0.35376	-3.49908	-1.64761	si:dkey-163m14.2_ENSDARG00000059507
0.630502	0.647919	1.14157	-1.03246	1.44202	-3.14794	-2.67401	-0.363668	-4	-1.34058	rbbp9_ENSDARG00000040713
-0.228765	0.850307	2.19892	-1.98619	0.587273	-2.67807	-2.91908	-1.02096	-4	-2.37851	cdc16_ENSDARG00000055470
0.726628	1.09732	1.08562	-0.511917	1.15142	-2.59229	-2.69613	-0.348588	-4	-4	commd1_ENSDARG00000031203
1.49573	1.02659	0.861248	-0.910483	1.14982	-2.60507	-3.39357	-1.853	-4	-4	pcdh1gc6_ENSDARG00000103950
0.879134	1.34564	1.7031	-0.996419	0.411148	-3.21484	-4	-1.34543	-4	-4	BX323555.2_ENSDARG00000039891
1.56662	0.872556	0.38529	-0.0126738	0.594744	-4	-3.02975	0.319402	-4	-4	PCDHGC3_ENSDARG00000098566
1.18361	1.38223	0.861039	0.191285	0.379244	-3.75528	-4	-0.752001	-2.64182	-4	si:ch211-236p22.1_ENSDARG00000077905
1.29275	1.34891	0.0841421	-0.0776969	1.24249	-4	-4	-1.0806	-3.57537	-4	PCDHGC3_ENSDARG00000100424
-0.326471	1.03444	0.947992	1.51051	-0.497893	-4	-1.1519	0.215967	-4	-4	phc3_ENSDARG00000074604
1.44049	-0.321621	1.21637	0.215709	0.333183	-3.27263	-2.82221	0.320138	-3.74135	-2.53171	hoxb3a_ENSDARG00000029263
0.0717558	0.178671	1.32909	0.974657	0.364363	-4	-3.24166	0.894878	-4	-4	si:ch211-208k15.1_ENSDARG00000088650
0.599868	0.270266	1.06382	1.24357	0.9618	-3.05166	-3.17719	-1.1068	-3.4667	-3.53229	egr4_ENSDARG00000077799
0.129659	-0.905107	1.37397	1.06467	1.39841	-2.96988	-2.58459	-0.502438	-4	-4	pik3ip1_ENSDARG00000003281
1.49849	1.08191	0.204368	0.622788	-0.353753	-2.13802	-1.7316	-0.449968	-2.36042	-2.96556	GNAZ_ENSDARG00000099844
1.60056	1.36196	0.0971711	0.135804	-0.51209	-2.78434	-1.48478	-0.310856	-3.192	-3.192	CNTN3_ENSDARG00000053454
1.31033	0.479895	1.21228	0.68215	-0.325319	-2.27143	-1.85639	-0.654754	-2.69289	-2.91528	triob_ENSDARG00000000370
1.46957	0.185675	1.53129	-0.191321	-0.789888	-1.94313	-1.18151	-0.267137	-2.69958	-3.99376	arl4aa_ENSDARG00000099918
1.54951	1.53378	0.733655	-0.164466	-1.00791	-2.77242	-1.33368	-1.32091	-3.03893	-4	shank3a_ENSDARG00000063332
1.64661	1.01398	1.13402	0.422042	-1.68268	-1.77578	-1.69916	-1.50548	-4	-4	si:dkey-33o22.1_ENSDARG00000087639
2.45221	-0.0677946	0.680018	-0.60589	-2.04083	-2.4034	-2.70825	-1.01436	-3.21075	-2.98836	rpz3_ENSDARG00000069728
1.79998	-0.0794345	1.71621	0.0255351	-3	-2.28379	-2	-0.876618	-3.34792	-4	fam101b_ENSDARG00000093931
-0.0450521	0.242338	0.97421	-1.926	1.9216	-0.183331	-1.30809	-1.60693	-3.29881	-3.09236	clgn_ENSDARG00000009315
1.03633	1.13038	0.116303	-1.91227	1.44106	-1.94141	-0.883697	-0.801235	-2.91227	-2.42684	dachd_ENSDARG00000069440
0.602784	0.91955	0.334588	-2.03465	1.95025	-1.64998	-1.27383	-1.1822	-4	-4	dusp10_ENSDARG00000052465
-0.141728	1.3078	1.00094	0.181234	1.05608	-0.46495	-2.1161	-2.31165	-3.17839	-2.87353	smad1_ENSDARG00000027199
0.73181	1.15543	0.869627	0.421883	0.632028	-0.401568	-2.12102	-2.17164	-4	-2.76954	CABZ01057411.1_ENSDARG00000060053
0.207781	1.08146	1.70672	-1.02618	0.840885	-0.652362	-2.04664	-2.22173	-4	-4	si:dkey-183c6.8_ENSDARG00000076443
0.812529	1.46136	0.864997	-0.365433	0.622427	-1.84925	-0.793966	-3.09436	-3.45693	-1.78316	CFAP70_ENSDARG00000058508
0.799056	1.43422	0.000919207	-0.850758	1.47779	-2.12378	-0.664345	-3.20624	-4	-2.33951	R3HDM2_ENSDARG00000102610
1.28413	1.49175	0.653881	-0.337885	0.309064	-1.47304	-1.37833	-2.4125	-2.71968	-3.95847	si:ch211-207i1.2_ENSDARG00000030107
1.69381	1.30097	0.289918	-1.25132	0.682587	-1.9251	-0.874469	-2.14749	-4	-4	CABZ01118678.2_ENSDARG00000091359
0.557113	1.06679	1.44265	-1.41864	-0.801968	0.740559	-0.570643	-2.74057	-2.74057	-3.0036	si:dkey-16p6.1_ENSDARG00000099825
0.22788	-0.275289	2.37627	-2.74041	0.275185	-0.78824	-0.960193	-3.01605	-4	-2.30978	UBA6_ENSDARG00000080019
0.469812	0.68613	0.808614	-0.573257	1.64601	-0.421254	-1.5879	-4	-4	-1.55876	zgc:113019_ENSDARG00000099743
0.839345	0.129837	1.59356	0.0939179	0.850152	-0.82362	-1.44335	-3.8009	-4	-2.34147	dvl3b_ENSDARG00000103462
-0.582957	0.669182	1.18376	-0.439999	1.83396	-1.97152	-0.623599	-3.16792	-4	-2.70849	ptpn2b_ENSDARG00000035986
-1.02707	0.811181	1.50597	-0.427606	1.82032	-1.90154	-1.71391	-4	-4	-4	si:ch211-256e16.3_ENSDARG00000052426
0.57712	0.977164	1.04931	-0.0603104	1.49338	-1.75024	-1.80574	-3.3907	-4	-4	adam10b_ENSDARG00000015502
1.41581	1.28196	0.482323	0.0232875	1.04277	-2.54004	-2.73269	-4	-4	-4	pcdh1g30_ENSDARG00000101865
0.858551	0.50588	-0.516488	0.892903	1.85638	-1.58575	-2.30703	-4	-4	-4	rnaseh2b_ENSDARG00000005128
0.757466	0.202718	1.25051	0.691079	1.5149	-2.83515	-3.06781	-4	-4	-4	robo2_ENSDARG00000078366
0.367005	-0.101614	1.20936	0.948205	1.67079	-1.70226	-4	-4	-4	-4	edar_ENSDARG00000099088
0.298738	2.12505	-0.411755	-2.06383	1.20206	-0.783724	-3.45615	-1.75571	-4	-3.13422	scara5_ENSDARG00000010425
0.578109	1.06026	0.688292	-2.07724	1.92276	-1.49228	-4	-1.22925	-4	-4	CU856222.1_ENSDARG00000097279
1.0795	0.74338	-0.540652	-0.756381	1.72683	0.0443106	-1.86927	-2.12561	-4	-4	si:ch211-281g13.5_ENSDARG00000074052
1.12228	1.53324	-0.646517	-1.4021	1.70615	-1.83599	-1.96845	-3.27657	-4	-4	si:ch73-262h23.4_ENSDARG00000092624
0.211138	0.211138	-0.119507	-2.35655	2.53307	-1.11951	-2.70447	-2.57894	-4	-4	thoc3_ENSDARG00000056517
1.61377	-1.00514	0.646933	-2.22754	1.27496	0.757357	-4	-1.42018	-4	-3.22754	si:ch211-241e1.3_ENSDARG00000022615
-0.267271	-0.769772	0.985116	0.294881	2.05466	-0.699382	-1.94874	-1.79402	-4	-4	PTPRD_ENSDARG00000104937
1.05711	-2.46975	1.01703	0.432071	1.72319	-0.728992	-3.32536	-2.13271	-3.13271	-4	tada2a_ENSDARG00000031562
0.604615	-1.34534	0.46201	0.621488	2.10811	-0.378512	-4	-4	-4	-4	lcmt2_ENSDARG00000000747
1.365	-1.45943	-0.584963	-0.956931	2.06413	0.570316	-4	-3.45943	-4	-4	ephb1_ENSDARG00000076757
-0.497325	1.10151	0.777854	-0.476567	1.69336	-1.69896	-1.56146	-2.35792	-1.21353	-2.28392	FO904917.1_ENSDARG00000098550
-1.57989	1.37185	0.381634	-0.0729315	1.87724	-1.85819	-1.48204	-2.24286	-2.76893	-2.65789	psmc6_ENSDARG00000037038
-0.970184	0.477275	1.46924	-1.65703	1.78955	-2.20722	-1.65703	-0.522725	-2.37072	-2.92712	alcamb_ENSDARG00000058538
-2.12387	-0.792028	1.48982	-0.458291	2.05707	-1.14896	-2.22697	-1.07496	-2.07496	-3.07496	ctdspl2b_ENSDARG00000060586
-1.01277	-3.65925	0.441651	-1.41132	2.64183	-1.68823	-1.51877	-2.27948	-1.5912	-1.98426	tktb_ENSDARG00000006019
-0.734769	-2.86601	0.280828	-0.84894	2.65006	-2.7989	-1.08841	-2.40035	-1.47697	-4	prrc1_ENSDARG00000044304
0.14865	-1.2995	1.67188	-0.143377	1.45692	-1.72834	-2.52189	-2.78492	-1.27903	-0.700858	btbd7_ENSDARG00000003069
0.288116	0.118481	0.883862	-1.62633	2.01227	-1.87371	-3.15977	-4	-1.93737	-0.330877	tspan5a_ENSDARG00000086033
-0.449253	0.951285	-0.0633621	-0.0707416	2.03789	-1.48825	-3.03422	-4	-0.689387	-2.54879	si:ch211-11n16.2_ENSDARG00000099779
0.934223	0.68121	-0.643025	1.54348	1.12928	-2.14938	-4	-4	-1.90837	-2.11696	surf1_ENSDARG00000003592
-0.722748	0.456455	-0.859321	0.862214	2.34986	-3.14089	-4	-4	-2.38416	-2.38416	si:dkey-188i13.11_ENSDARG00000092895
0.662347	1.14021	-1.27178	-0.126232	1.59738	-0.126232	-1.32496	-2.38205	-4	-1.79709	chd7_ENSDARG00000075211
1.04699	1.13103	-0.501684	-0.199309	1.16201	0.259356	-1.68642	-3.29523	-3.64753	-2.06257	hmox2b_ENSDARG00000078452
0.302148	0.529831	0.293391	1.09477	1.14553	-0.952616	-1.70881	-4	-4	-0.308135	sgce_ENSDARG00000012138
0.610987	1.62303	-1.09147	0.0929555	1.317	-1.66338	-1.38098	-3.5509	-4	-0.918632	pdk1_ENSDARG00000013128
-0.628966	0.0044007	-0.710761	0.089708	2.0706	-0.408198	-3.71076	-4	-4	0.639737	traf2a_ENSDARG00000030173
-0.560715	-1.42579	0.501569	0.890981	2.20357	-1.37516	-3.42579	-3.70958	-4	-1.04332	trappc1_ENSDARG00000039005
-1.29105	1.52838	-0.378512	-0.520531	1.86942	-1.57116	-2.05658	-1.67807	-2.79355	-0.85495	si:ch211-157b11.14_ENSDARG00000076850
-0.824004	1.33081	0.542318	-0.846724	1.77219	-0.300442	-2.36457	-2.91711	-4	-1.65408	nelfcd_ENSDARG00000021097
-1.25802	1.73697	-2.7275	-0.521051	1.86208	-0.450661	-1.78409	-2.03562	-2.42794	-1.67305	si:dkey-16p6.1_ENSDARG00000099994
-1.76236	1.80817	-1.94581	-0.44475	1.98853	-1.1991	-2.3366	-4	-2.97047	-1.2586	mrpl17_ENSDARG00000075677
-0.561144	1.29945	-0.127247	-4	2.2444	-0.870472	-3.48714	-4	-2.63915	-1.41675	get4_ENSDARG00000024398
-0.314447	2.72768	-1.33954	-1.72948	-0.0956119	-2.96297	-4	-4	-3.58747	-0.633269	ryr1b_ENSDARG00000023797
-0.0102683	-0.68834	0.159657	1.59177	1.49526	-1.35819	-1.23266	-1.4957	-3.23266	-2.6477	wdr82_ENSDARG00000014083
-0.257609	-0.121287	0.382604	0.774524	1.9814	-2.52846	-0.804097	-1.46706	-4	-2.65971	rrp1_ENSDARG00000103337
0.360726	-0.90157	-0.992911	2.00944	1.10505	-1.75845	-0.832446	-3.66534	-3.72674	-1.03113	dclre1c_ENSDARG00000045704
-1.52356	-0.665581	-1.13124	2.00782	1.75256	-2.52356	-1.35364	-3.52356	-3.20163	-1.27563	ehmt2_ENSDARG00000102325
0.253574	1.44444	0.234465	0.649503	0.97719	-0.765535	-1.60204	-1.43976	-4	-4	robo2_ENSDARG00000014891
-0.309939	1.163	0.331926	0.0608988	1.64265	-1.58296	-0.32243	-1.64436	-4	-4	gnsa_ENSDARG00000023766
0.480401	1.44941	-0.410841	0.0382134	1.5358	-2.30136	-1.6513	-0.948691	-3.23627	-4	lysmd2_ENSDARG00000091771
0.0241209	2.16298	-1.56834	0.152763	0.955226	-1.48087	-1.30155	-1.59106	-4	-4	bbs10_ENSDARG00000069515
1.4424	0.55726	-0.174807	1.53501	-0.472488	-2.05745	-0.969987	-1.19947	-4	-3.73552	rmnd1_ENSDARG00000027465
1.5006	1.33976	-0.471143	1.0372	0.292928	-3.1592	-1.80556	-2.37493	-4	-4	ppp1r9bb_ENSDARG00000071709
1.79022	-0.105994	0.0422707	0.878649	0.707652	-0.924423	-1.51538	-2.86003	-4	-4	phf21ab_ENSDARG00000021378
0.45362	0.714148	0.576017	1.9876	0.00820881	-1.92189	-1.92189	-4	-4	-4	senp3b_ENSDARG00000056741
-1.38618	0.30968	0.19698	1.16507	2.07767	-1.37006	-2.66552	-4	-4	-2.98744	tmem181_ENSDARG00000045910
-1.59418	-0.0278342	0.0629313	0.716607	2.29784	-0.411978	-2.97269	-4	-2.83519	-4	rnmt_ENSDARG00000070553
-1.44361	-0.289801	0.969175	1.73032	1.25683	-0.932645	-1.01065	-3.59561	-4	-4	cpeb1a_ENSDARG00000045932
-1.98185	-1.1745	-0.0276563	2.59179	0.572736	-0.937459	-2.39689	-4	-4	-3.39689	ntpcr_ENSDARG00000021853
-2.3425	-1.60553	-2.37997	2.39862	1.77085	-1.41845	-3.45797	-4	-3.37997	-4	si:ch211-227e10.6_ENSDARG00000102215
0.574314	-0.505334	0.474281	1.03857	1.38005	-1.39212	-3.60434	-1.12852	-1.16004	-1.35021	tm4sf18_ENSDARG00000060668
-0.184179	0.186045	0.574115	1.24137	1.59662	-2.69437	-3.15381	-2.09491	-2.03833	-1.47198	sb:cb81_ENSDARG00000040503
0.00923821	-1.54535	2.01689	0.583932	0.962444	-2.37543	-4	-0.844911	-2.738	-1.96039	kctd2_ENSDARG00000025875
-0.36793	-2.2569	2.05699	0.87391	1.08097	-2.51993	-4	-4	-1.31135	-1.96739	hdc_ENSDARG00000075454
1.2915	0.739701	0.433399	0.61417	0.827163	-1.49734	-3.2603	-3.30469	-0.689984	-4	srgap1a_ENSDARG00000007461
1.23922	0.175087	0.676484	0.778665	0.985116	-0.31034	-3.50674	-4	-1.63227	-4	smtnl1_ENSDARG00000041257
0.0497321	-0.699206	0.66225	2.09376	0.488421	-0.846763	-2.22527	-4	-1.91493	-4	rassf8b_ENSDARG00000045485
1.36976	0.866094	0.334481	-0.133906	1.2836	-0.897466	-4	-3.73877	-2.41684	-2.62329	CLSTN2_ENSDARG00000060638
1.03689	-0.255464	1.79252	0.133198	0.727006	-1.64517	-4	-4	-3.24851	-1.47322	BX324132.1_ENSDARG00000068792
1.63653	0.516234	0.0643326	1.52203	0.0191438	-1.80802	-4	-4	-4	-2.83148	si:ch211-214j24.9_ENSDARG00000015931
1.70657	-1.41954	0.993764	0.810759	0.531073	-4	-1.39206	-0.930154	-2.07558	-4	ext1c_ENSDARG00000035649
0.492923	1.11599	0.874671	-0.850222	1.29576	-3.60511	-0.283181	-1.74713	-2.05052	-2.85022	st13_ENSDARG00000021973
1.40774	0.206104	1.33539	0.122581	0.535228	-4	-0.945899	-1.62397	-2.11582	-4	emc9_ENSDARG00000034633
1.17241	0.373327	1.08702	-0.183066	1.26863	-4	-1.57009	-1.36364	-2.68557	-3.27053	col8a2_ENSDARG00000060893
1.60406	-0.265828	-0.699626	-0.340417	1.90285	-3.81762	-0.910733	-2.10713	-2.9195	-4	CABZ01015815.2_ENSDARG00000105672
0.23327	0.0608033	1.57538	-0.787194	1.60709	-1.52416	-1.39291	-3.10912	-1.82901	-4	nudt12_ENSDARG00000100813
0.392021	-0.288584	0.128986	0.145971	2.14362	-1.68598	-1.10995	-3.60798	-1.58289	-4	l3mbtl3_ENSDARG00000025983
1.63779	-1.51602	0.675126	-1.37851	1.742	-1.89934	-1.25298	-3.25298	-1.42291	-4	si:ch211-194k22.8_ENSDARG00000096711
0.50298	0.850561	1.7019	-0.222845	0.522025	-3.0302	-1.30438	-4	-0.847997	-2.87266	adamtsl3_ENSDARG00000027903
1.00512	0.997799	1.49835	-0.344462	0.696826	-3.81323	-2.00588	-3.29866	-1.76261	-4	greb1_ENSDARG00000070794
0.169491	0.549339	1.36431	-1.77928	1.76599	-2.56169	-1.45066	-4	-0.865699	-4	lrrn3b_ENSDARG00000102702
0.98945	-0.059916	0.37777	0.680697	1.53112	-2.50572	-2.71984	-2.11577	-0.582337	-4	frmd4bb_ENSDARG00000076496
1.1237	1.10683	0.0549892	1.1237	0.693675	-3.30256	-2.84313	-2.36396	-1.65871	-3.6396	syn2b_ENSDARG00000101054
1.35593	0.322728	-0.0104398	0.514173	1.25058	-3.44986	-4	-0.766335	-0.759546	-4	map1b_ENSDARG00000060434
0.986128	1.59642	-0.662965	0.138131	1.37479	-4	-4	-1.80047	-1.57808	-4	FP103009.1_ENSDARG00000105002
1.78082	0.0695409	-0.695994	0.606569	1.152	-2.60288	-2.43296	-4	-0.432959	-4	caprin2_ENSDARG00000020749
1.64287	0.966375	-1.66338	0.104451	1.32684	-2.01485	-3.06547	-4	-0.663375	-4	elovl6_ENSDARG00000004402
1.22771	0.9911	1.44272	0.613659	-0.650303	-2.91222	-3.41918	-2.88575	-1.42871	-4	PCDHGC3_ENSDARG00000099487
1.79742	0.611003	1.07495	0.758646	-1.43962	-2.78755	-3.34009	-3.07705	-1.09723	-4	pcdh2ab3_ENSDARG00000071905
2.01014	1.23333	-0.44859	0.204188	0.0379385	-3.67356	-4	-2.50363	-1.18813	-4	fam84a_ENSDARG00000018921
2.02428	1.21791	-0.105742	0.608585	-0.349895	-4	-4	-4	-1.44505	-4	CT954240.1_ENSDARG00000097742
1.15679	1.71057	0.65168	-0.100782	0.440955	-3.22773	-4	-4	-1.01901	-4	PCDHGC3_ENSDARG00000101667
0.656607	1.9432	1.21454	0.0735744	-0.527677	-4	-4	-4	-1.34339	-4	RIMBP2_ENSDARG00000104101
0.908272	0.615254	1.99555	0.196343	-0.113997	-3.67985	-4	-2.79849	-1.90541	-4	syt17_ENSDARG00000060741
1.2756	-0.00885092	1.381	0.518245	1.11853	-4	-4	-4	-1.88826	-4	CT573264.1_ENSDARG00000077343
1.01316	-0.5061	0.763507	-1.53605	2.07639	-3.05207	-3.374	-2.86303	-1.08859	-2.374	actc1a_ENSDARG00000042535
0.907013	1.00829	0.262179	-1.45054	1.94591	-3.22815	-4	-2.47751	-2.1998	-2.72161	nr6a1b_ENSDARG00000014480
0.621488	0.0166263	0.717066	-2.21078	2.32951	-2.04477	-4	-4	-1.84042	-4	asf1bb_ENSDARG00000043713
1.16382	-0.589535	0.861126	-0.113956	1.88109	-3.98185	-4	-1.71882	-1.74919	-4	fgfrl1b_ENSDARG00000052556
1.02815	-0.978835	0.432696	-1.91045	2.32619	-3.34341	-4	-1.12618	-2.11075	-4	si:ch211-189a21.1_ENSDARG00000089829
-0.963474	0.638562	0.514573	-0.311397	2.3272	-2.6009	-2.77083	-1.6009	-4	-4	adcy5_ENSDARG00000091342
-1.42597	1.33587	0.542318	-1.42597	2.25014	-2.2491	-4	-1.70161	-4	-4	txnl4b_ENSDARG00000058962
0.475638	0.110873	0.260899	-1.17206	2.42884	-4	-2.75702	-1.49399	-4	-4	cpne5b_ENSDARG00000070919
0.757639	-0.0149503	-0.51245	-1.59991	2.53451	-2.59991	-3.59991	-2.01495	-4	-4	gas1b_ENSDARG00000067984
-0.906054	0.124973	0.799203	-0.259691	2.50702	-4	-4	-4	-4	-3.84465	BX664614.2_ENSDARG00000097944
-1.81147	-0.741082	0.436456	-1.54844	2.88341	-4	-4	-4	-4	-4	tacr3a_ENSDARG00000075112
1.73924	0.4916	1.02709	0.910684	-0.202774	-4	-2.17678	-3.66221	-4	-2.76174	pcdh2ab10_ENSDARG00000103906
1.99965	-0.833456	0.947077	0.720869	0.726488	-4	-2.25817	-4	-4	-4	si:dkey-9a6.4_ENSDARG00000105475
0.389743	-0.977039	2.41889	0.502954	-0.224966	-3.64	-1.31808	-3.64	-4	-4	CABZ01090749.1_ENSDARG00000074639
1.11702	0.994532	1.52995	-0.355053	0.561116	-3.98732	-1.22179	-3.98732	-3.50189	-4	csmd2_ENSDARG00000001559
1.26285	1.11798	1.61749	-0.180021	0.167902	-4	-2.17379	-4	-4	-3.12488	CU929046.1_ENSDARG00000038974
1.60213	0.336896	1.98234	-1.78743	0.336896	-4	-2.34383	-4	-4	-4	CR931780.1_ENSDARG00000096866
1.42758	1.24295	1.79742	-0.429813	-1.5538	-4	-3.37977	-3.25424	-2.59128	-4	pcdh2ab5_ENSDARG00000090348
1.04075	0.321928	2.03159	0.92679	-1.17557	-4	-3.67807	-3.67807	-3.26303	-4	NPR1_ENSDARG00000018750
-0.309156	1.34348	1.80538	0.983126	-0.147405	-3.38444	-4	-3.1918	-4	-4	tgfa_ENSDARG00000053939
-0.730292	0.765666	2.56551	-0.0614975	-0.430731	-4	-4	-4	-3.69377	-4	itih1_ENSDARG00000055053
-0.404141	2.17614	-0.940895	-0.245152	1.36057	-2.50568	-1.09064	-4	-3.50568	-4	oxct1a_ENSDARG00000013063
-1.01642	2.31374	0.425684	-0.726915	0.795782	-4	-0.561856	-3.16465	-4	-4	rnls_ENSDARG00000012453
-2.27586	2.27873	0.787151	0.698146	0.501749	-4	-4	-4	-2.49825	-4	defbl3_ENSDARG00000097181
1.25172	0.538496	-0.596273	0.424615	1.81312	-4	-3.11085	-1.56849	-3.69581	-3.56456	FP015823.1_ENSDARG00000044129
0.719729	1.81371	-0.640861	0.0192892	1.40731	-4	-2.81079	-1.62316	-4	-4	CT573264.3_ENSDARG00000079424
0.995308	1.36621	-1.28951	-0.266787	1.95963	-4	-4	-2.45943	-4	-4	sox10_ENSDARG00000077467
0.338554	1.65928	0.353505	0.571215	1.19654	-4	-1.93898	-3.39841	-2.92448	-4	aes_ENSDARG00000021805
1.03545	0.928893	0.574557	0.941405	1.14769	-4	-2.45465	-4	-2.80975	-4	si:ch211-136a13.1_ENSDARG00000060927
0.839073	1.80878	0.279856	0.997854	0.348842	-4	-2.5275	-4	-4	-4	eya1_ENSDARG00000014259
0.335103	1.38663	-0.0227901	1.21076	1.42205	-4	-3.47663	-4	-4	-4	CR352285.4_ENSDARG00000105463
-0.196272	1.0684	-0.119566	1.26361	1.86636	-4	-4	-4	-4	-4	CDHR1_ENSDARG00000104756
-0.00484126	1.73455	0.962462	0.367128	1.26357	-4	-4	-4	-4	-4	foxd3_ENSDARG00000021032
1.35328	1.72399	-0.63756	1.29706	-0.371485	-4	-3.35638	-3.03445	-4	-4	si:ch73-290k24.6_ENSDARG00000092260
0.910653	1.81968	-0.223649	1.43282	-0.121769	-4	-4	-4	-4	-3.41128	CABZ01061349.1_ENSDARG00000105487
0.425656	1.93155	-0.38531	1.21225	0.724315	-4	-4	-4	-4	-4	GABRG3_ENSDARG00000099919
1.54706	1.53182	0.434107	-0.209407	0.48247	-2.90985	-2.44036	-2.36236	-4	-4	mmel1_ENSDARG00000105389
1.53574	1.64011	0.481863	-0.0442743	0.0513033	-2.96731	-3.14664	-2.7263	-3.71054	-3.14664	c7a_ENSDARG00000042172
1.30106	1.21647	1.39757	-0.375016	0.408305	-4	-2.98223	-2.02779	-4	-4	FO818659.1_ENSDARG00000093185
1.42786	1.69515	1.06711	-1.03477	-0.0347654	-4	-2.93289	-2.39232	-3.22239	-4	adcy2a_ENSDARG00000058392
1.77509	0.655988	0.432024	0.432024	0.9143	-3.72693	-4	-2.25562	-3.6014	-4	mtus2a_ENSDARG00000062347
1.67165	1.64946	-0.199881	0.247041	0.430046	-4	-4	-2.98326	-3.43577	-4	BX248331.3_ENSDARG00000102650
1.21883	1.01854	0.934267	0.0489096	1.35472	-4	-4	-3.03355	-4	-4	BICD1_ENSDARG00000098551
1.14107	1.22091	0.677066	-0.449991	1.55115	-4	-4	-2.84231	-4	-4	FP015823.2_ENSDARG00000094975
0.290657	1.65003	0.937499	0.107016	1.2528	-3.98045	-4	-2.87353	-4	-4	Sep-03_ENSDARG00000030656
1.86188	0.748106	0.608381	-0.0910398	0.967324	-4	-4	-3.5373	-2.77176	-4	dnah3_ENSDARG00000068468
1.85728	0.21995	0.812891	-0.118068	1.21594	-4	-4	-4	-4	-3.30495	CEP170B_ENSDARG00000078327
1.78185	1.04488	0.726199	-0.520716	0.988558	-4	-3.42761	-4	-4	-4	PCDHGC3_ENSDARG00000102198
1.82942	1.44933	0.0947133	0.083398	0.495593	-4	-3.49025	-4	-4	-4	cpne7_ENSDARG00000102584
1.60403	1.35838	0.0621387	0.157898	1.13455	-4	-4	-4	-4	-4	ADORA3_ENSDARG00000059899
1.44117	1.56939	1.12731	-0.182457	0.277299	-4	-4	-4	-4	-4	FAM155A_ENSDARG00000086224
1.93815	1.24755	0.649104	0.0868223	0.0488211	-4	-4	-4	-4	-3.93586	unc80_ENSDARG00000098290
0.815765	1.39676	0.882475	1.05586	0.601759	-4	-4	-4	-3.86112	-4	CABZ01046981.1_ENSDARG00000101640
1.19369	1.1949	0.645358	0.81785	0.99582	-4	-4	-4	-4	-4	ppp2r5b_ENSDARG00000054931
1.45649	1.14161	0.674834	1.01928	0.328383	-3.99354	-3.63097	-4	-4	-4	CHST8_ENSDARG00000074560
1.58116	0.771499	0.966285	0.590641	0.733385	-3.98625	-4	-4	-4	-4	CR627483.1_ENSDARG00000017545
1.03268	1.0525	1.61638	0.313348	0.414551	-4	-4	-4	-3.44781	-3.46919	FP085414.1_ENSDARG00000100270
1.36738	0.282821	1.84067	0.114845	0.440273	-4	-4	-3.92663	-4	-4	zgc:77784_ENSDARG00000042646
1.04676	1.54052	1.58416	-0.565758	0.208865	-3.23669	-4	-4	-4	-4	parvb_ENSDARG00000019117
1.36847	1.42584	-0.186461	-0.647885	1.55337	-4	-2.38047	-4	-3.72443	-4	CR812832.1_ENSDARG00000103278
0.805913	2.09869	0.786548	-1.44563	0.75202	-4	-3.25298	-4	-4	-4	CT573264.2_ENSDARG00000078339
0.525398	1.91612	-0.139316	-0.483014	1.60693	-4	-4	-4	-4	-4	cyp26a1_ENSDARG00000033999
-0.435423	1.7541	-0.457791	-0.965938	2.17974	-4	-3.93423	-4	-4	-4	sncga_ENSDARG00000034423
1.10525	0.371291	0.348571	-0.928269	2.17793	-4	-4	-4	-2.47671	-4	chrnb4_ENSDARG00000101677
0.817059	1.03108	-0.0437896	-0.445169	2.08876	-4	-4	-4	-3.28305	-4	si:dkey-151j17.4_ENSDARG00000104016
2.04298	-0.0473057	-0.632268	-0.511253	1.7323	-2.25376	-4	-4	-4	-4	htr7a_ENSDARG00000056949
0.233044	0.349141	-0.606916	0.224961	2.43398	-2.34388	-4	-4	-4	-4	prr7_ENSDARG00000089800
1.5616	0.779779	-0.767709	1.1268	1.35628	-4	-4	-4	-4	-4	si:dkey-224b4.1_ENSDARG00000099836
2.32315	0.271128	-0.562314	0.607112	0.330425	-4	-3.16082	-3.56682	-3.0061	-4	mff_ENSDARG00000053753
2.34581	-0.483517	-0.67159	1.12617	0.445292	-4	-4	-4	-4	-4	CABZ01041610.1_ENSDARG00000014169
1.11806	-0.537296	-1.64977	1.37918	2.02952	-4	-4	-2.95233	-4	-4	rock2bl_ENSDARG00000100381
1.64669	-0.258312	-1.68281	0.259087	2.11911	-4	-4	-3.34577	-4	-4	cntn5_ENSDARG00000021584
1.06676	-0.688698	-0.297119	0.423195	2.31904	-4	-4	-4	-4	-4	si:ch73-215d9.1_ENSDARG00000103001
2.29345	-0.45042	0.331299	-2.64024	0.839535	-4	-2.02554	-4	-0.686049	-1.78226	zgc:114120_ENSDARG00000101812
1.31777	-0.00415563	2.19627	-3.53467	0.00965017	-2.06074	-1.6602	-4	-2.06074	-4	ift80_ENSDARG00000038879
2.46027	-0.355526	0.443334	-4	0.664103	-2.29742	-2.54535	-2.738	-2.22342	-4	tp53rk_ENSDARG00000090821
-0.12843	1.53715	-1.94202	-4	2.37553	-2.89895	-2.89895	-1.70101	-3.07952	-4	CU633978.1_ENSDARG00000097674
1.58305	2.11314	-0.93505	-2.45861	0.374278	-2.99918	-1.96676	-1.90402	-4	-4	wdr47a_ENSDARG00000078136
0.665805	2.7331	-1.28637	-4	0.25616	-4	-4	-2.64	-4	-4	clic6_ENSDARG00000099108
1.90122	0.750656	1.02566	-2.01873	1.02168	-4	-4	-2.30824	-4	-4	ctxn1_ENSDARG00000098284
0.772676	-0.250741	0.72812	-3.39983	2.46535	-4	-4	-3.44714	-4	-4	pcdh2g1_ENSDARG00000103256
2.10254	1.31468	0.224799	-4	0.706541	-4	-4	-4	-4	-1.61908	CU013548.1_ENSDARG00000096837
2.47174	0.266157	0.0109001	-4	0.872621	-3.06883	-2.52826	-4	-4	-3.9433	bloc1s2_ENSDARG00000046081
2.48245	1.33201	-1.04918	-4	0.496469	-4	-4	-4	-4	-4	si:dkey-19a16.16_ENSDARG00000007067
1.14534	-0.461428	-2.18866	-1.93373	2.68925	-4	-2.93373	-4	-4	-4	CU467964.2_ENSDARG00000097443
1.83712	-1.46666	-2.02809	-3.25516	2.45659	-4	-4	-4	-3.39266	-4	si:dkey-226k3.4_ENSDARG00000090634
0.84178	-0.75967	1.30121	-3.03269	2.21524	-2.15822	-2.61765	-4	-4	-4	BX323064.2_ENSDARG00000104365
-0.073657	-0.378512	1.23447	-3.14405	2.42277	-2.88101	-1.65862	-4	-4	-4	glmna_ENSDARG00000058267
-1.73888	-0.040642	1.97182	-2.61973	2.08746	-3.14439	-3.16993	-4	-4	-4	pwwp2a_ENSDARG00000075526
0.392238	-0.936088	2.52625	-2.03562	1.11122	-4	-4	-4	-4	-4	dcun1d2a_ENSDARG00000040838
-1.26303	-1.43296	2.58941	-3.21057	1.55193	-4	-4	-4	-3.43296	-4	FNDC10_ENSDARG00000078657
-0.514573	-1.8365	2.43296	-4	1.80735	-4	-4	-4	-4	-4	CABZ01092282.1_ENSDARG00000100145
-3.07205	1.83794	1.67593	-4	1.32027	-3.32581	-1.8765	-3.07205	-3.27136	-4	zgc:101851_ENSDARG00000037199
-4	0.895936	1.39637	-4	2.46122	-4	-4	-4	-4	-4	CT737129.1_ENSDARG00000101284
1.63846	1.34274	1.64804	-4	-1.01747	-2.55474	-2.0794	-4	-4	-2.0794	trpc3_ENSDARG00000098291
1.58681	1.45792	1.02933	-2.82412	0.814481	-3.28355	-4	-4	-2.28355	-4	CR392036.1_ENSDARG00000069895
0.982513	2.14852	1.26882	-3.05311	-0.420843	-2.20511	-4	-4	-4	-4	CR391986.1_ENSDARG00000078130
1.41871	2.3278	-0.0297473	-2.61471	-0.122857	-2.44478	-4	-4	-4	-4	CABZ01085924.1_ENSDARG00000103290
0.50916	1.65698	2.05305	-2.36026	-1.12996	-1.85124	-4	-4	-1.53713	-4	znf1005_ENSDARG00000099917
0.468648	2.18367	1.46183	-1.21488	-1.55883	-3.25927	-2.79984	-3.67431	-2.17181	-4	zgc:153722_ENSDARG00000071044
0.604771	2.29847	1.27462	-1.73918	-1.98019	-4	-4	-3.2697	-1.04731	-4	elovl7a_ENSDARG00000069279
-0.503876	2.13425	1.47979	-3.59785	0.286671	-4	-4	-0.994511	-2.01289	-4	atad1a_ENSDARG00000023267
-0.721926	2.59465	0.783714	-4	0.389435	-3.60234	-2.06178	-4	-4	-4	si:dkey-20i20.15_ENSDARG00000098898
-0.0565835	2.50413	0.321928	-4	1.03653	-4	-4	-4	-3.96347	-4	aldh3b1_ENSDARG00000013839
-0.649451	2.94122	-1.15424	-2.50572	-0.375012	-3.77873	-4	-4	-2.23441	-4	Mar-04_ENSDARG00000055839
-0.979909	2.88546	0.454187	-3.21257	-1.89064	-2.83406	-3.07507	-4	-4	-4	nicn1_ENSDARG00000069677
0.249676	0.853159	2.42332	-1.5521	-2.17659	-4	-0.807355	-1.63227	-4	-2.67409	eif3eb_ENSDARG00000002549
-0.433459	1.995	2	-2.53107	-1.04564	-4	-1.78261	-2.17493	-4	-4	zgc:63568_ENSDARG00000087262
-1.0259	1.32501	2.56948	-1.51972	-2.61086	-2.27645	-2.09003	-4	-3.13443	-4	hdhd2_ENSDARG00000024728
-0.727463	1.54518	2.49178	-3.36857	-3.006	-2.76089	-1.65236	-4	-4	-3.06045	znhit1_ENSDARG00000054574
0.397448	1.05372	2.35944	-0.439053	-3.1089	-2.8679	-4	-1.17602	-4	-4	si:ch211-241e1.5_ENSDARG00000008906
0.0107264	2.45551	1.13848	-0.744161	-3.42223	-2.28473	-2.93681	-2.04372	-4	-4	smarcd3a_ENSDARG00000038786
-1.29026	0.613884	2.90914	-2.41954	-4	-3.83458	-4	-1.96011	-4	-4	bckdhbl_ENSDARG00000093569
0.618848	2.5073	1.32456	-4	-4	-4	-3.18851	-2.60354	-4	-4	ublcp1_ENSDARG00000044492
-0.239865	2.65281	1.30203	-3.1574	-4	-3.32733	-4	-3.1574	-4	-4	tmem170b_ENSDARG00000071205
1.66936	1.73508	1.70549	-4	-4	-4	-3.03405	-4	-4	-4	FO704873.2_ENSDARG00000104346
1.49043	0.174174	2.59451	-4	-4	-4	-4	-4	-4	-4	SLITRK3_ENSDARG00000078123
1.63115	-0.752479	2.62678	-4	-3.29897	-4	-4	-4	-4	-4	FQ377605.1_ENSDARG00000101927
1.56645	1.51221	-1.99214	0.32979	0.278716	-2.42824	-1.12338	-0.81526	-2.70834	-3.34577	si:ch211-196f5.9_ENSDARG00000096451
1.3972	0.975244	-2.7866	0.0648811	1.53219	-2.40327	-1.95261	-1.00638	-2.06223	-2.91784	lgals2a_ENSDARG00000054942
0.318464	1.86595	-4	1.58381	0.261881	-2.57462	-2.57462	-1.29451	-2.57462	-4	znf1021_ENSDARG00000088861
0.0280144	2.49248	-1.67243	0.0824622	-0.212994	-2.21299	-2.86507	-0.628031	-4	-3.67243	BX914214.2_ENSDARG00000099277
1.32824	1.96882	-1.86711	-0.956373	1.03593	-2.11864	-3.34104	-1.38168	-4	-4	mpz_ENSDARG00000038609
1	2.37485	-2.92283	-1.80735	0.492205	-2.18587	-3.50779	-0.752907	-3.50779	-4	anapc5_ENSDARG00000008461
0.156007	0.0331503	-2.98477	-2.69789	2.52492	-0.448719	-2.54116	-0.541165	-2.23631	-4	si:dkey-16p6.1_ENSDARG00000091746
1.0982	-0.198962	-2.16859	-2.66609	2.49911	-0.89557	-3.58363	-2.16859	-3.16859	-4	nudt6_ENSDARG00000103523
1.46211	0.133483	-3.59234	-2.76922	2.32377	-0.338585	-3.38589	-4	-4	-4	BX571952.1_ENSDARG00000088837
0.703018	2.15116	-3.8413	-0.0687128	1.35509	-4	-4	-4	-1.51937	-4	si:ch211-193l2.5_ENSDARG00000103339
1.365	1.49993	-4	0.646768	1.59946	-4	-4	-4	-4	-4	vstm4b_ENSDARG00000053186
1.15557	2.3432	-4	0.521698	0.15557	-4	-4	-4	-3.33628	-4	irbp_ENSDARG00000059163
-0.661277	2.64453	-4	-2.41616	1.39119	-1.71572	-4	-4	-4	-4	znf987_ENSDARG00000094459
0.563675	1.77488	-4	-2.77131	2.18289	-3.23074	-3.42339	-4	-4	-2.23074	FO834902.2_ENSDARG00000078378
0.796775	1.08761	-4	-2.91839	2.57986	-4	-4	-4	-4	-4	BX663528.1_ENSDARG00000097923
0.486229	2.62008	-4	-4	1.07119	-3.94673	-3.26866	-3.26866	-4	-3.6837	srek1ip1_ENSDARG00000043728
2.61432	-1.25669	-3.91966	-3.50462	1.51775	-3.50462	-4	-3.18269	-2.3347	-4	CT009487.2_ENSDARG00000105183
3.0037	0.110619	-4	-2.47434	-1.2817	-3.2817	-4	-2.69674	-4	-4	cdcp2_ENSDARG00000075866
-1.95964	0.826233	-1.73016	1.15392	2.28041	-2.73016	-3.35819	-3.11718	-4	-2.4957	GRM7_ENSDARG00000100267
-1.16993	1.57032	-1.822	0.277534	2.20985	-4	-2.30743	-4	-4	-2.16993	si:dkey-122a22.2_ENSDARG00000095821
-1.08538	1.73278	-1.8959	1.31055	1.74351	-4	-4	-4	-4	-4	chst2a_ENSDARG00000075007
-1.53066	1.43979	-1.65266	-0.610835	2.57729	-4	-4	-4	-4	-4	dexi_ENSDARG00000055474
-0.846818	1.00236	-4	-0.804998	2.58732	-3.12693	-2.47485	-1.805	-2.0763	-4	si:ch1073-266p11.2_ENSDARG00000100261
-1.29094	0.68634	-3.70598	-0.898623	2.72029	-1.89862	-1.70598	-2.29094	-4	-4	st7l_ENSDARG00000032603
-1.84318	-0.201634	-2.67968	-0.0440926	2.80298	-4	-2.09472	-1.23911	-3.90207	-4	alpl_ENSDARG00000015546
-1.10992	1.26512	-1.93999	-0.887525	2.59283	-4	-4	-2.23545	-4	-4	BX322661.2_ENSDARG00000095041
-1.88101	0.69053	-2.14405	-1.52738	2.84993	-4	-3.46597	-2.05094	-4	-4	otpa_ENSDARG00000014201
1.14492	1.18628	-4	-0.875206	2.19403	-4	-2.49296	-4	-4	-3.18101	si:dkey-71h2.2_ENSDARG00000043394
1.07467	0.331309	-4	-0.0312607	2.41184	-4	-2.42358	-4	-3.42358	-4	srsf9_ENSDARG00000008097
0.894162	-0.696194	-4	0.140956	2.61271	-4	-1.924	-4	-4	-4	kitlgb_ENSDARG00000058042
0.701181	0.00320956	-3.16672	-0.681289	2.67626	-4	-4	-3.02921	-3.02921	-4	eef1a2_ENSDARG00000006838
-0.584963	1.04567	-4	0.296393	2.52466	-3.6105	-3.41785	-4	-3.83289	-4	zgc:153704_ENSDARG00000045979
-0.336744	1.88399	-4	-0.56302	2.27511	-4	-4	-4	-4	-4	CT583672.1_ENSDARG00000098691
-2.3505	0.770518	-4	-0.180572	2.82343	-4	-2.86507	-4	-4	-4	gemin4_ENSDARG00000041252
-1.13557	2.65041	-2.31615	0.504884	0.284758	-4	-4	-1.31615	-4	-4	tfap2a_ENSDARG00000059279
-3.3634	2.75899	-2.30451	0.00582908	0.621488	-4	-4	-1.59082	-4	-4	polr2c_ENSDARG00000033596
-1.40439	3.01197	-4	0.137504	-2.03242	-4	-4	-4	-2.90689	-4	nphs2_ENSDARG00000042850
-3.29646	0.149799	-2.0638	-4	3.00915	-4	-2.33298	-2.81103	-3.81103	-4	zgc:113372_ENSDARG00000053263
-0.596935	0.147226	-4	-4	2.99851	-4	-2.74894	-4	-4	-4	qrsl1_ENSDARG00000032704
-4	2.77823	-4	-4	1.56417	-4	-4	-2.88753	-4	-4	BX005477.1_ENSDARG00000093327
1.26255	-4	2.13592	-0.502985	0.875526	-3.31034	-2.82491	-2.63227	-1.93183	-4	WIPI1_ENSDARG00000037357
2.29272	-4	0.970788	-1.40118	1.34425	-4	-4	-2.16672	-4	-4	sgms2_ENSDARG00000052520
-0.792195	-4	1.90282	-0.368387	2.13797	-3.69032	-1.69032	-3.06228	-4	-4	dusp23b_ENSDARG00000089245
0.326415	-3.83458	1.01231	-0.0976108	2.49932	-4	-4	-4	-4	-4	rnf175_ENSDARG00000037647
-1.15797	-2.70229	2.74892	-1.76369	1.10507	-3.11733	-4	-3.4799	-4	-4	ruvbl2_ENSDARG00000055639
-0.627088	-4	1.7151	-2.556	2.56054	-4	-4	-4	-4	-4	CABZ01072523.1_ENSDARG00000105760
1.45317	-2.58496	0.514573	-1.48543	2.21501	-2.58496	-2.07039	-3.80735	-4	-2.39232	ddx52_ENSDARG00000100505
2.01483	-1.39865	0.85815	-0.388737	1.5661	-4	-4	-4	-4	-4	nanos1_ENSDARG00000078976
1.14457	-3.2817	-1.11177	1.17773	2.2652	-4	-4	-4	-4	-2.69674	SYNGR1_ENSDARG00000103577
1.34312	-4	-0.354315	-1.47631	2.53952	-4	-4	-3.97881	-1.17145	-4	parapinopsinb_ENSDARG00000044672
1.259	-4	-2.03562	-1.8657	2.82546	-4	-4	-4	-4	-4	zgc:123035_ENSDARG00000103797
-0.440573	-4	-0.118644	-2.66297	2.91446	-2.34104	-2.44057	-2.16046	-4	-4	ccdc97_ENSDARG00000074703
-1.40352	-2.86295	0.245577	-4	2.99814	-4	-3.54102	-2.69302	-4	-4	polm_ENSDARG00000103470
0.817136	-4	-4	-4	2.974	-3.58496	-4	-2.14439	-4	-4	zgc:152986_ENSDARG00000079957
1.11505	-2.54157	-4	0.488177	2.35997	-4	-2.06764	-1.21964	-4	-1.6671	nup35_ENSDARG00000012222
-0.267651	-1.16074	-3.96809	1.47485	2.36283	-1.96809	-4	-1.38313	-3.38313	-4	gtf2h4_ENSDARG00000036071
-0.11527	-0.075377	-4	1.11481	2.40771	-4	-4	-1.21288	-4	-2.46442	ndel1a_ENSDARG00000010953
-0.528928	-0.461814	-4	2.61791	1.16622	-4	-3.33628	-4	-3.33628	-4	ftr42_ENSDARG00000099940
0.858179	-2.19018	-4	2.80571	-0.190184	-4	-4	-3.32769	-4	-4	kcnk12l_ENSDARG00000057037
-0.418468	-2.07382	-4	0.570036	2.84027	-3.81079	-4	-4	-3.58839	-2.69531	trpm1b_ENSDARG00000103476
-0.536053	-4	-4	2.2713	2.1078	-4	-4	-2.53605	-4	-4	CR318589.2_ENSDARG00000104351
-2.66297	-4	-4	1.05585	2.927	-4	-4	-2.66297	-4	-4	si:dkey-33c3.1_ENSDARG00000096870
-1.51937	-4	-4	0.274175	3.06559	-4	-4	-4	-3.8413	-4	adra1aa_ENSDARG00000028725
-4	-4	-4	3.08605	-0.0969596	-3.91929	-4	-2.23725	-4	-2.80885	ins_ENSDARG00000035350
